# Supplementary material for: Wet deposition of inorganic ions in 320 cities across China: spatio-temporal variation, source apportionment, and dominant factors
Source: Copernicus journal article supplement (doi:10.5194/acp-19-11043-2019), 2019-09-02

**Fig. S7** The precipitation and wet deposition fluxes of secondary ions in Arksu

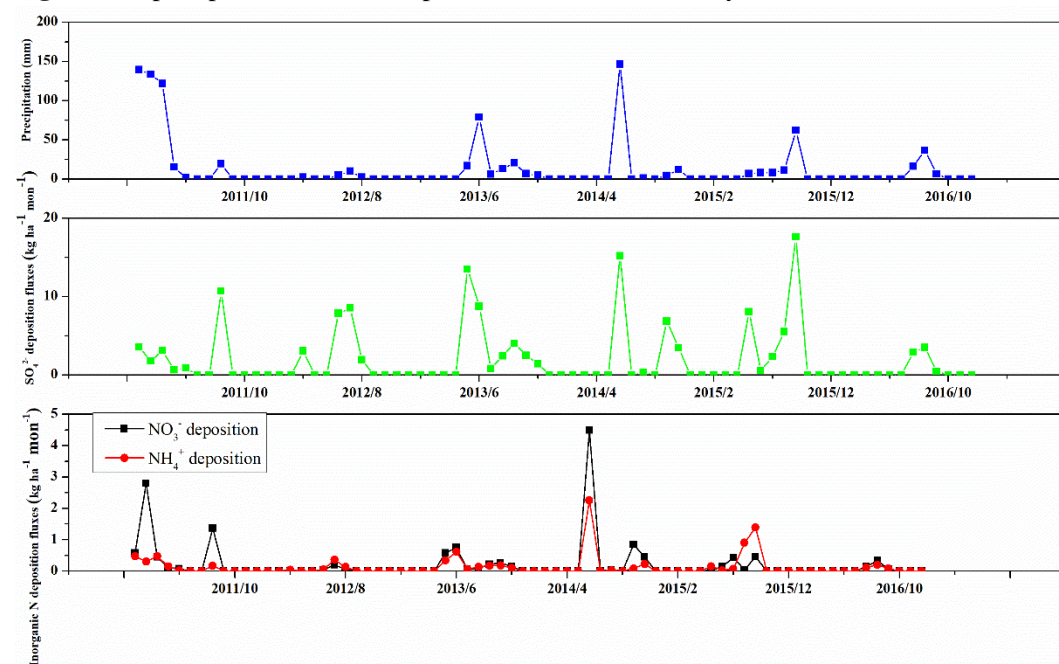

**Fig. S8** The precipitation and wet deposition fluxes of secondary ions in Anqing

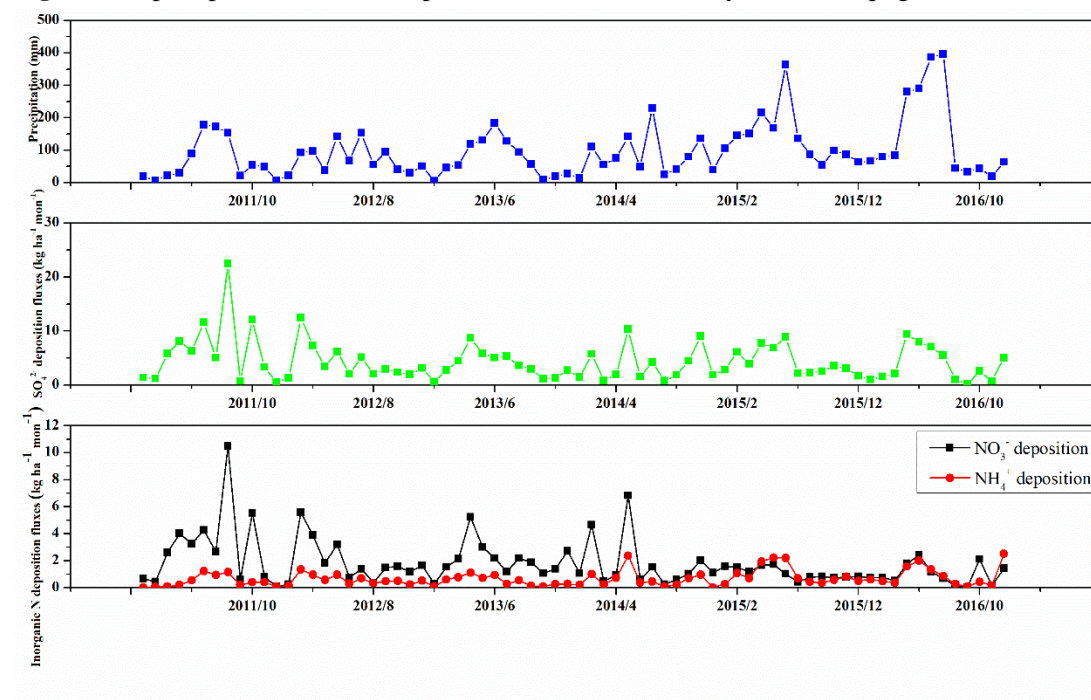

**Fig. S9** The precipitation and wet deposition fluxes of secondary ions in Anshan

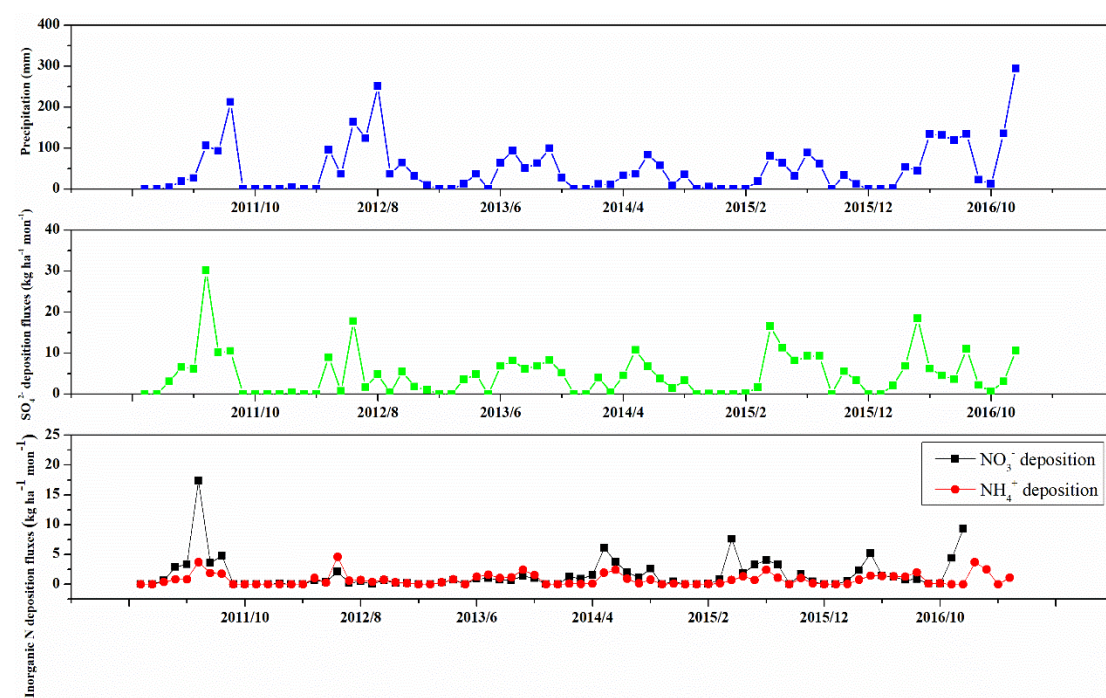

**Fig. S10** The precipitation and wet deposition fluxes of secondary ions in Baishan

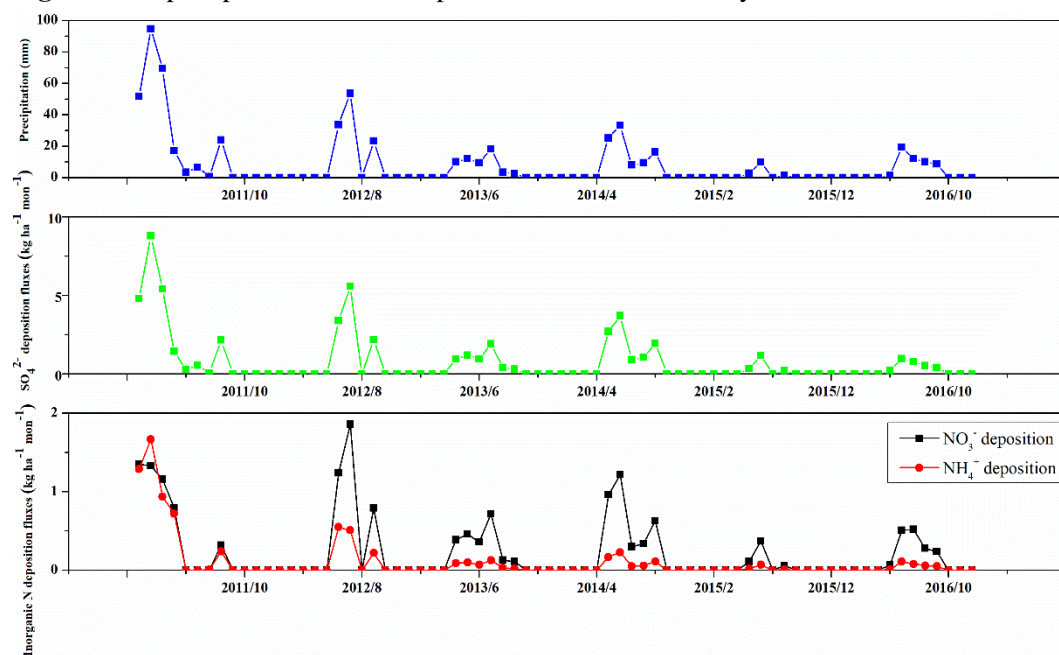



**Fig. S11** The precipitation and wet deposition fluxes of secondary ions in Bengbu

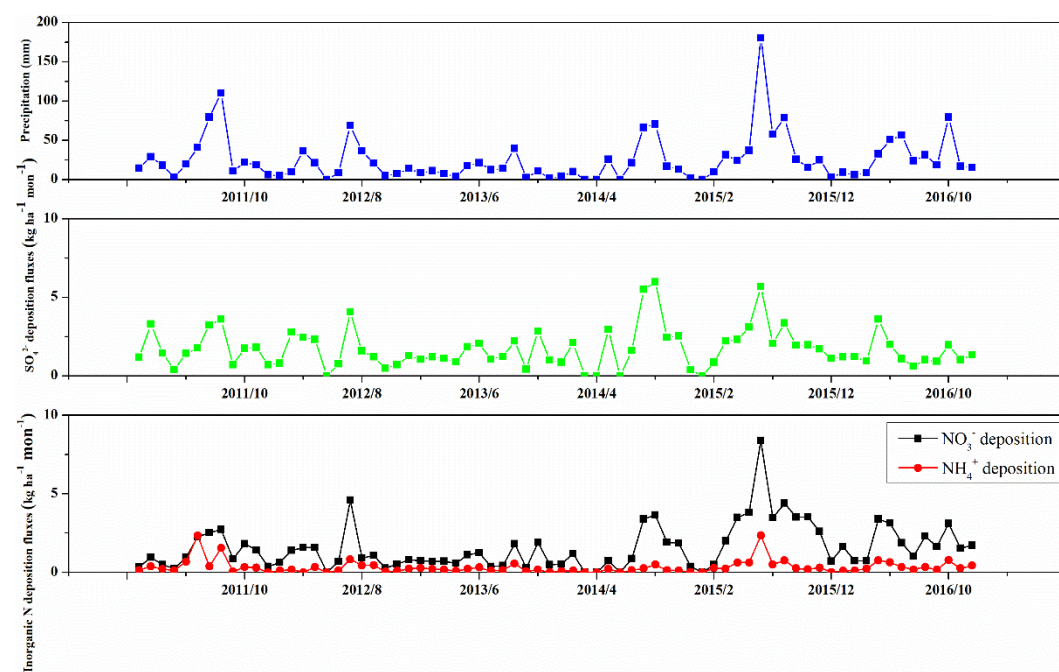

**Fig. S12** The precipitation and wet deposition fluxes of secondary ions in Beijing

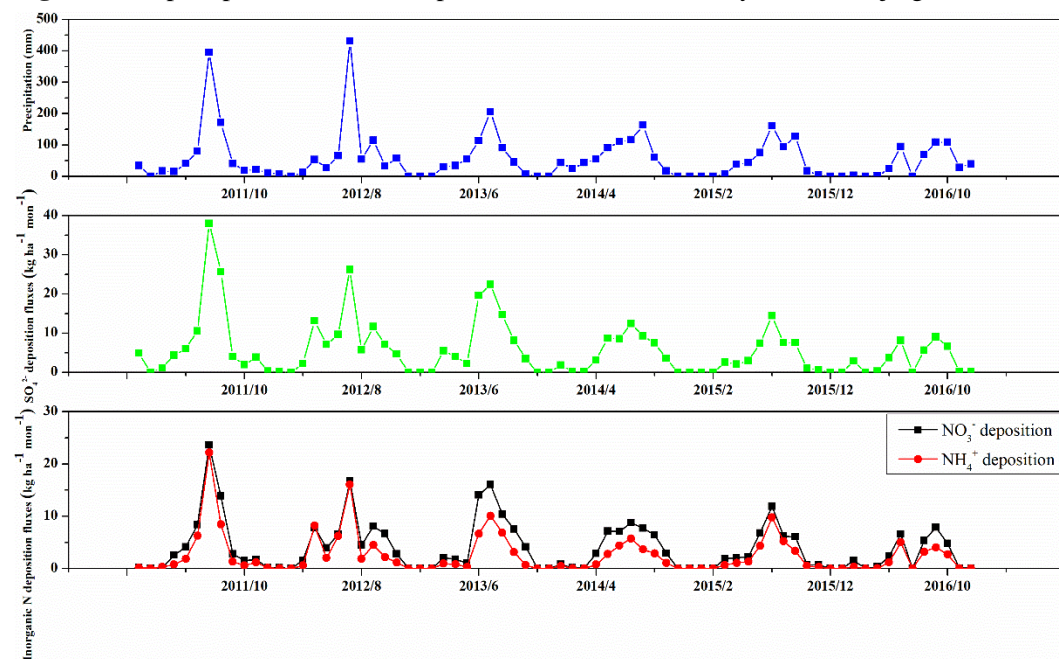

**Fig. S13** The precipitation and wet deposition fluxes of secondary ions in Benxi

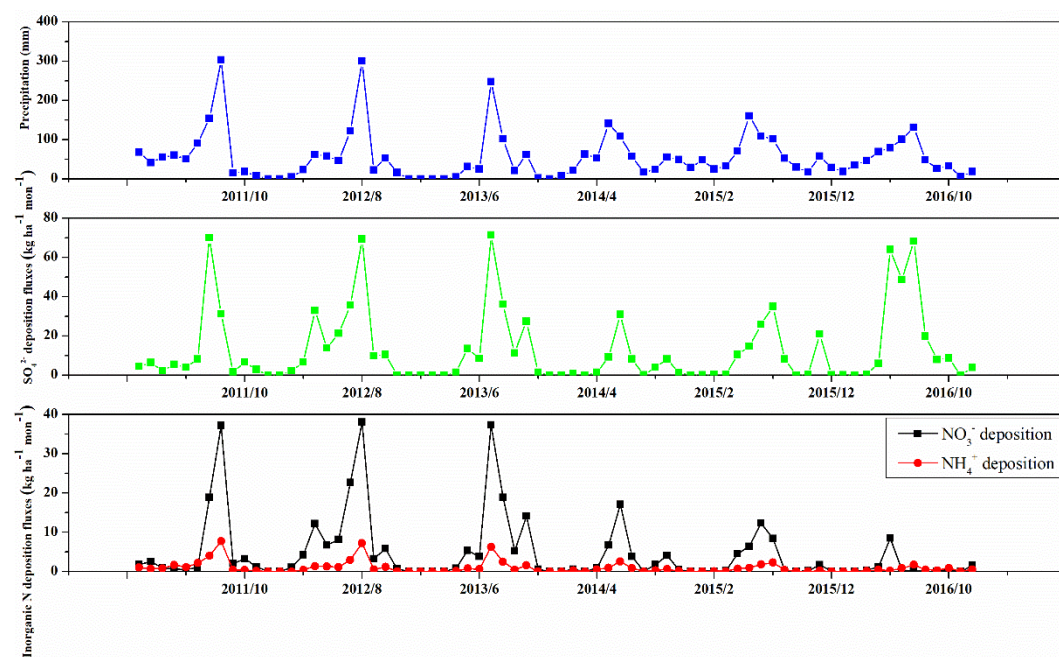

**Fig. S14** The precipitation and wet deposition fluxes of secondary ions in Binzhou

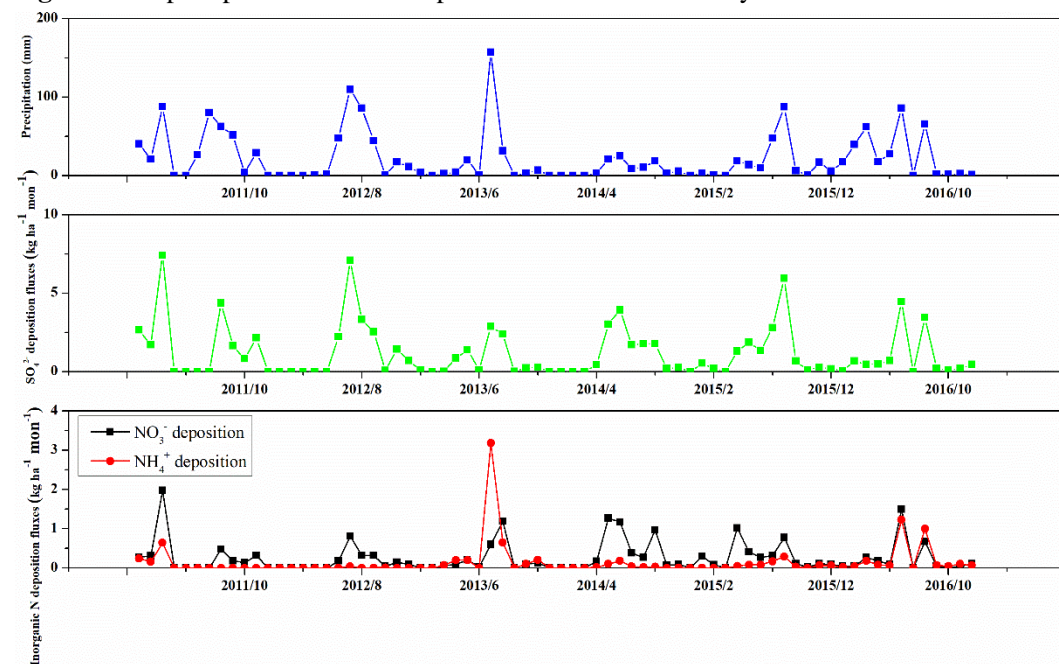

**Fig. S15** The precipitation and wet deposition fluxes of secondary ions in Cangzhou

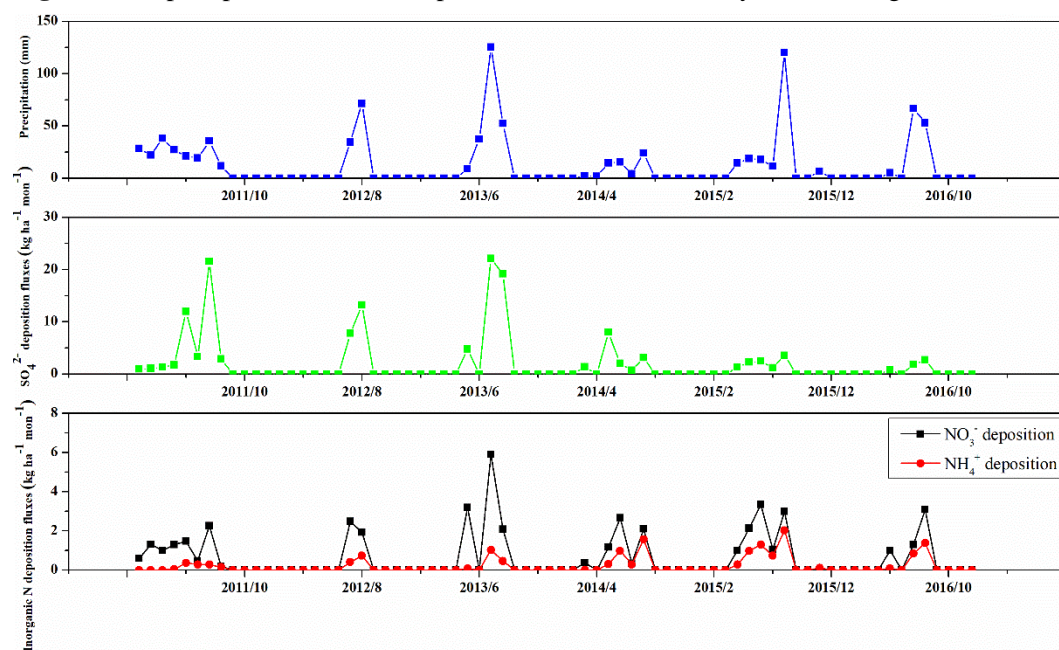

**Fig. S16** The precipitation and wet deposition fluxes of secondary ions in Changji

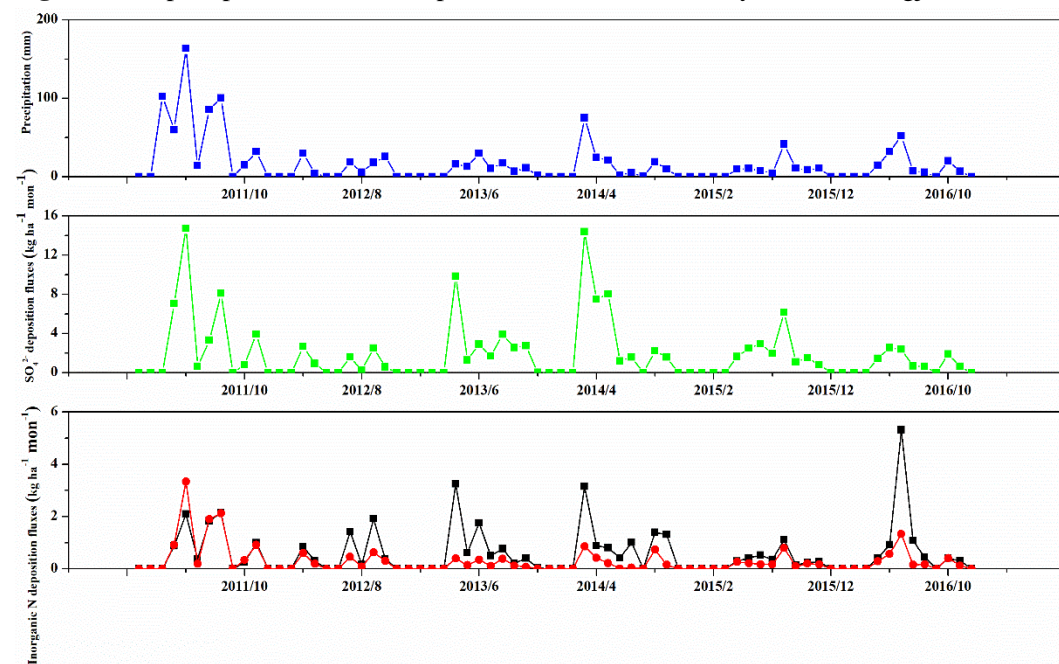



**Fig. S17** The precipitation and wet deposition fluxes of secondary ions in Changzhou

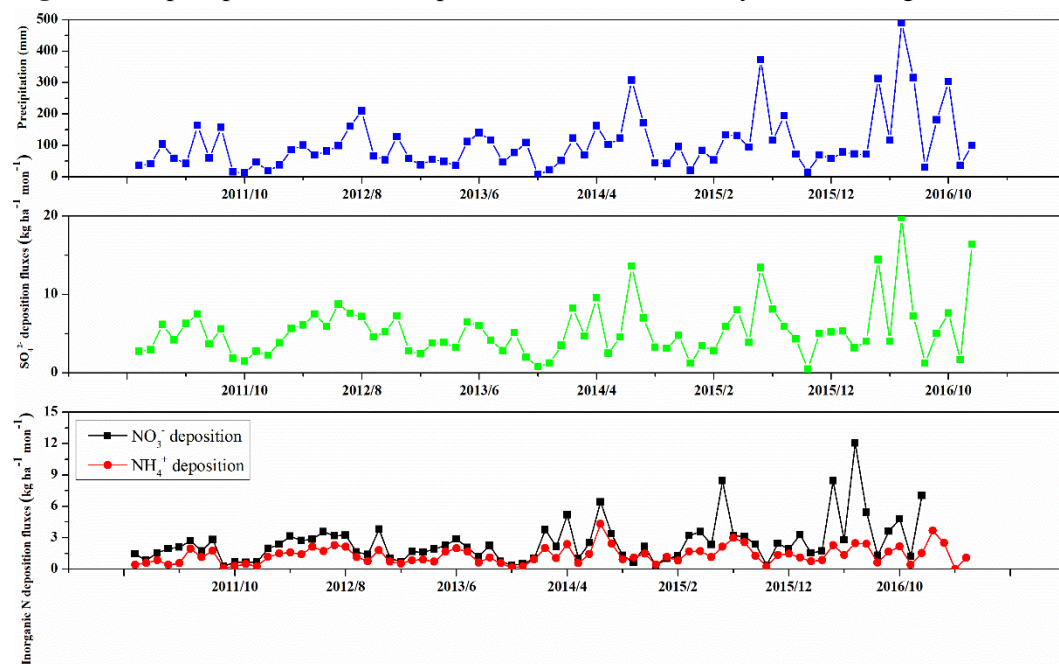

**Fig. S18** The precipitation and wet deposition fluxes of secondary ions in Chizhou

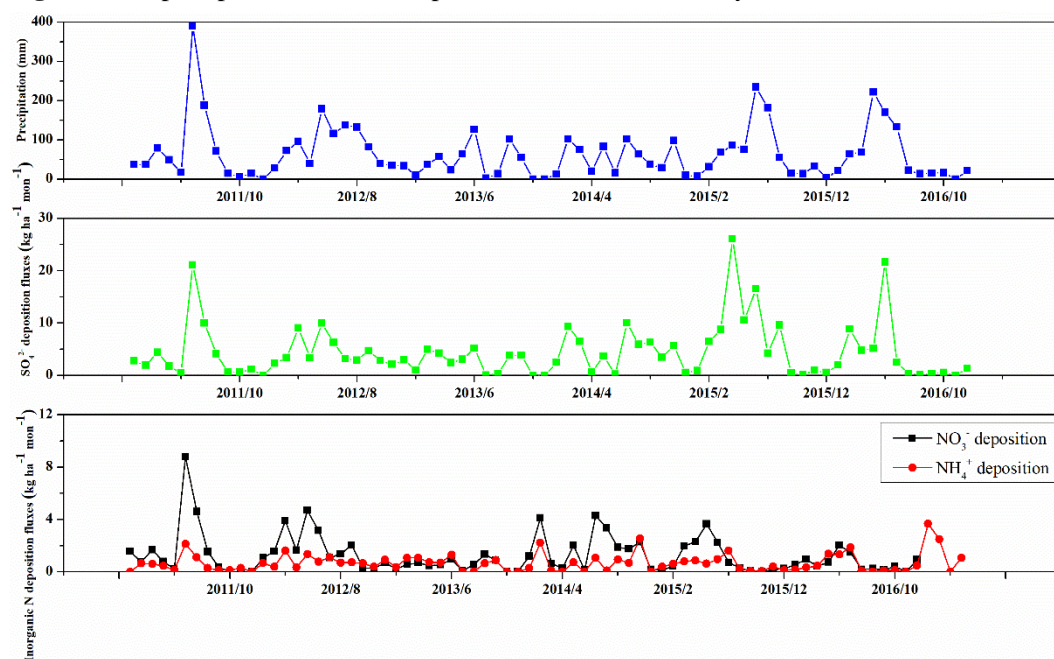

**Fig. S19** The precipitation and wet deposition fluxes of secondary ions in Chifeng

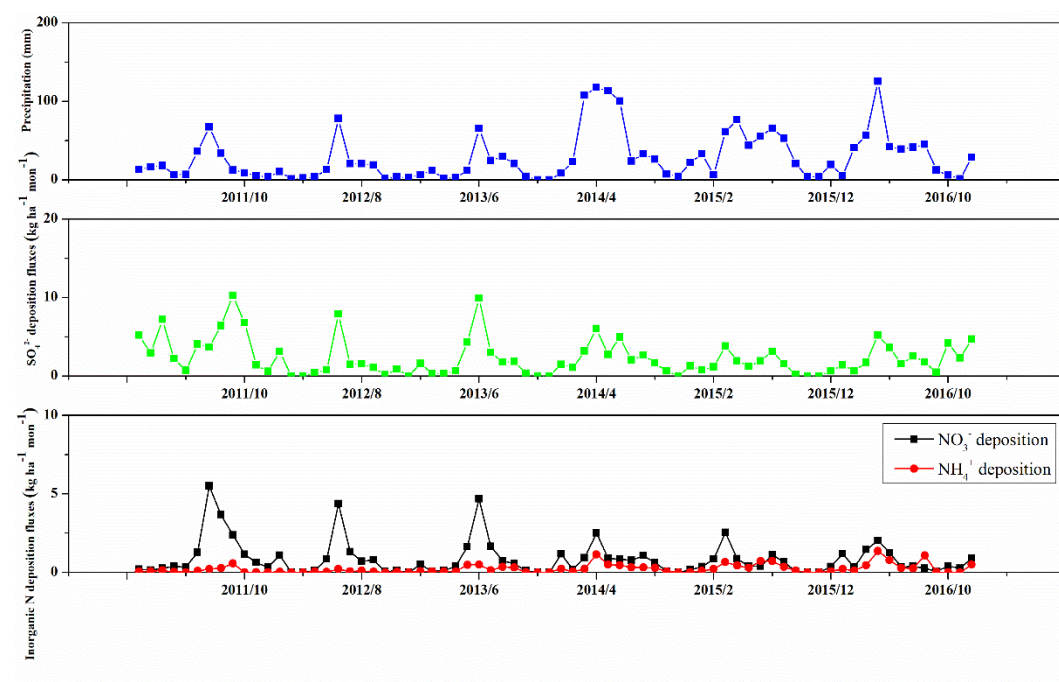

**Fig. S20** The precipitation and wet deposition fluxes of secondary ions in Chuxiong

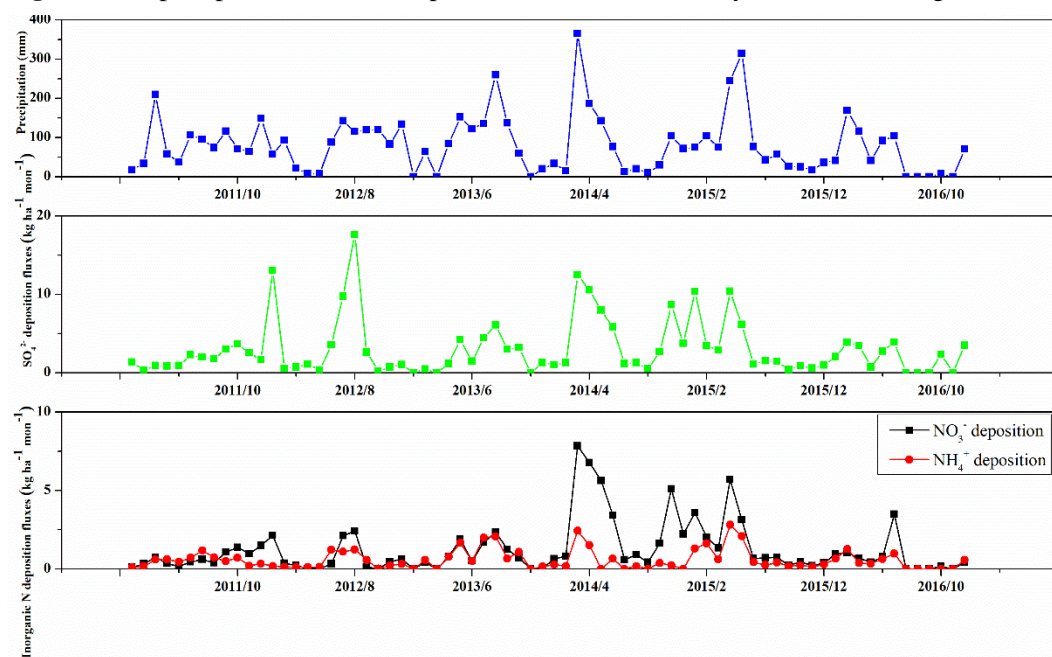

**Fig. S21** The precipitation and wet deposition fluxes of secondary ions in Dazhou

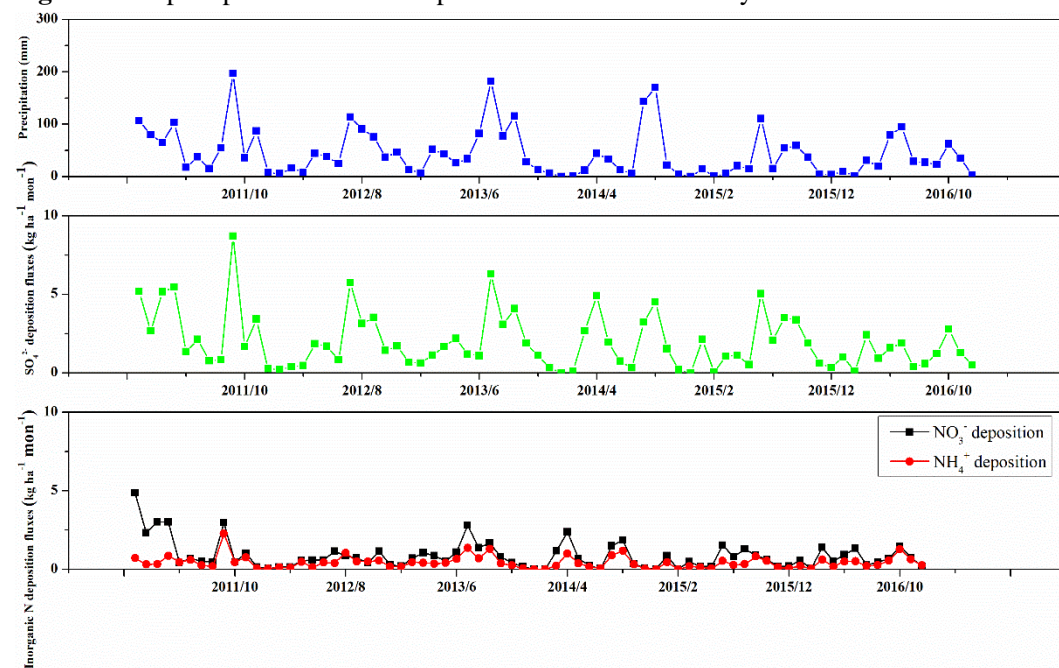

**Fig. S22** The precipitation and wet deposition fluxes of secondary ions in Dalian

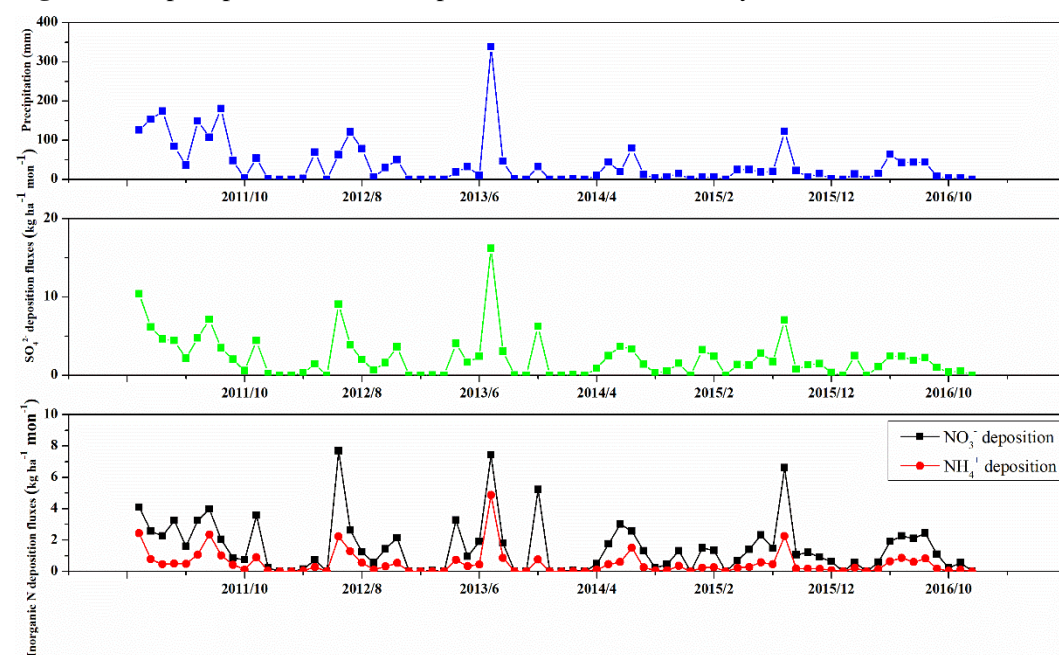



**Fig. S23** The precipitation and wet deposition fluxes of secondary ions in Daqing

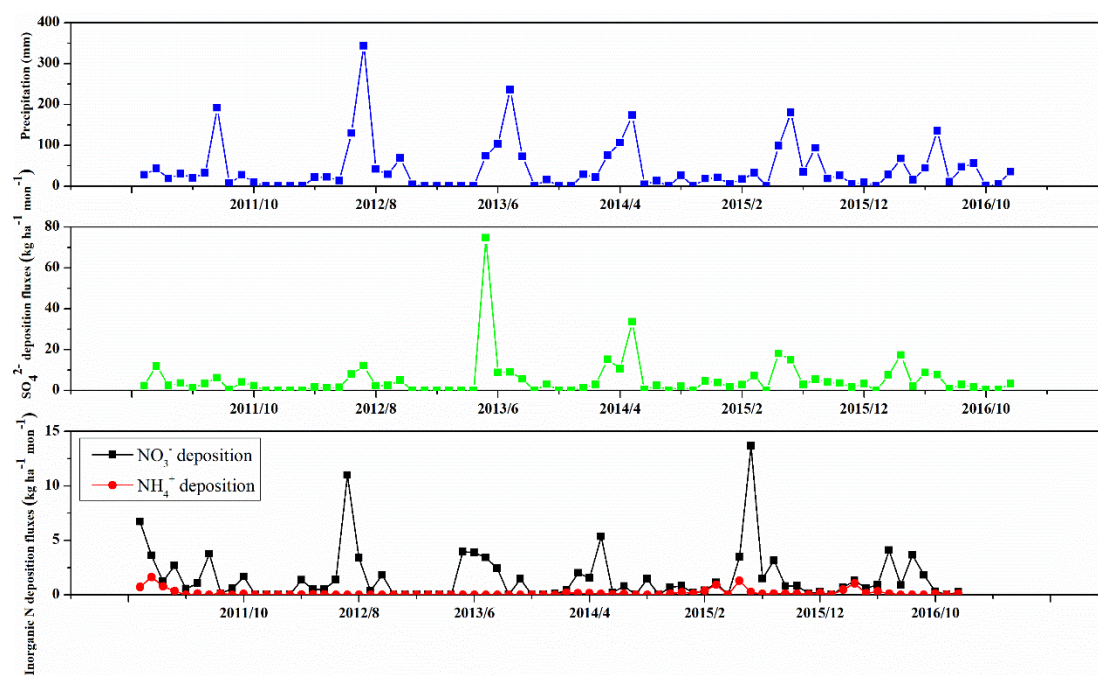

**Fig. S24** The precipitation and wet deposition fluxes of secondary ions in Dandong.

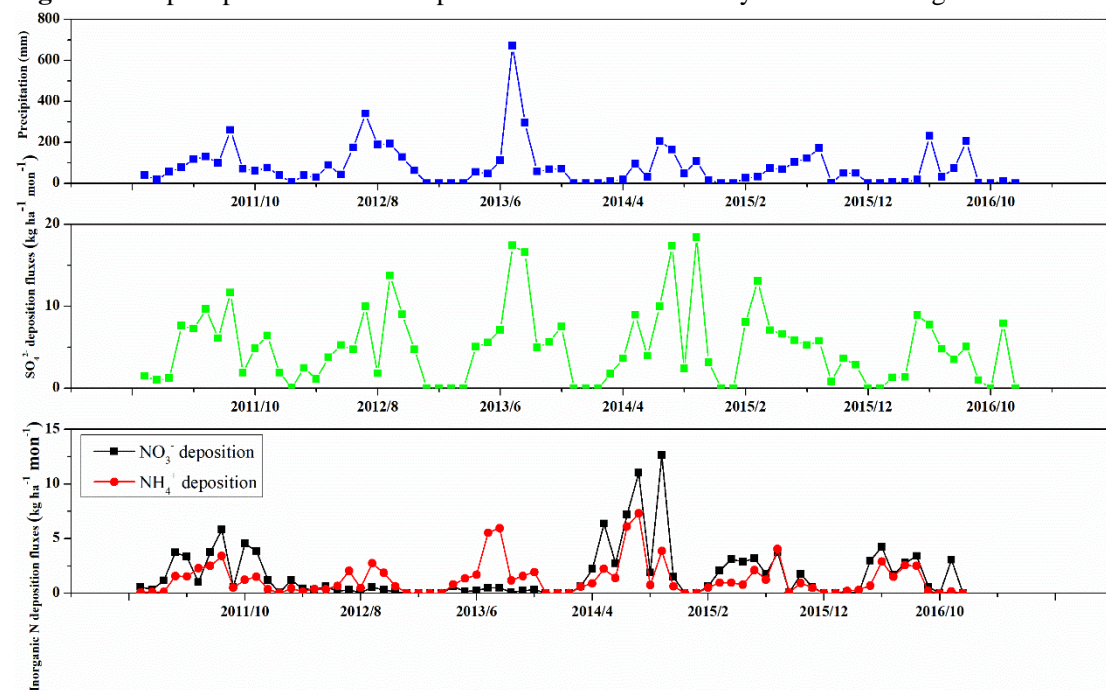

**Fig. S25** The precipitation and wet deposition fluxes of secondary ions in Dehong

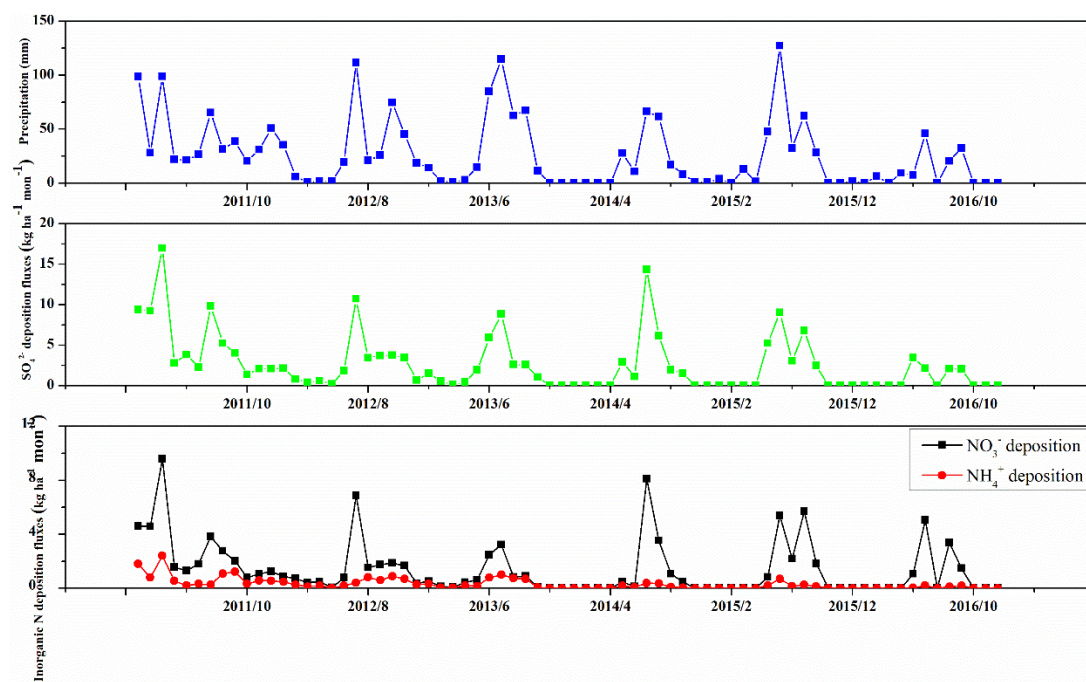

**Fig. S26** The precipitation and wet deposition fluxes of secondary ions in Erdos

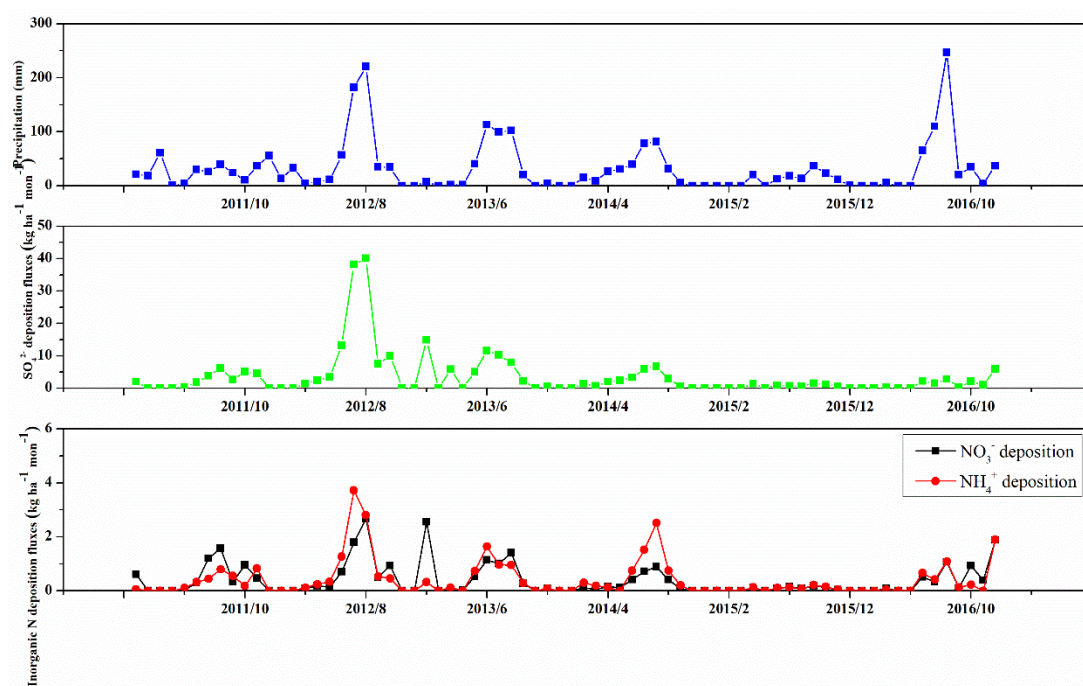

**Fig. S27** The precipitation and wet deposition fluxes of secondary ions in Foshan

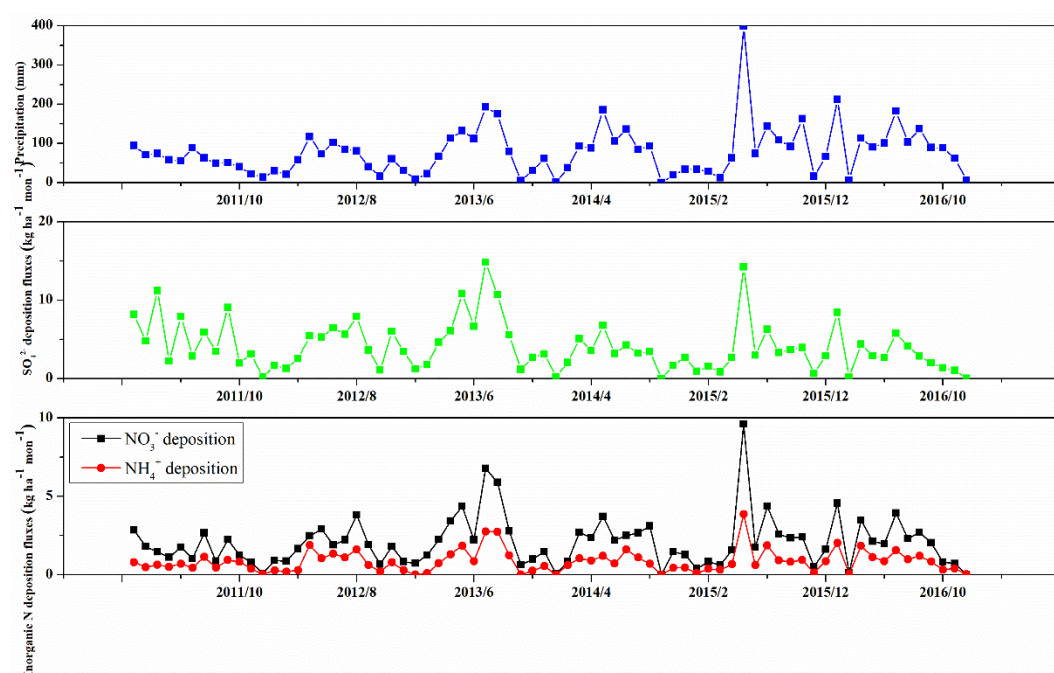

**Fig. S28** The precipitation and wet deposition fluxes of secondary ions in Fuzhou

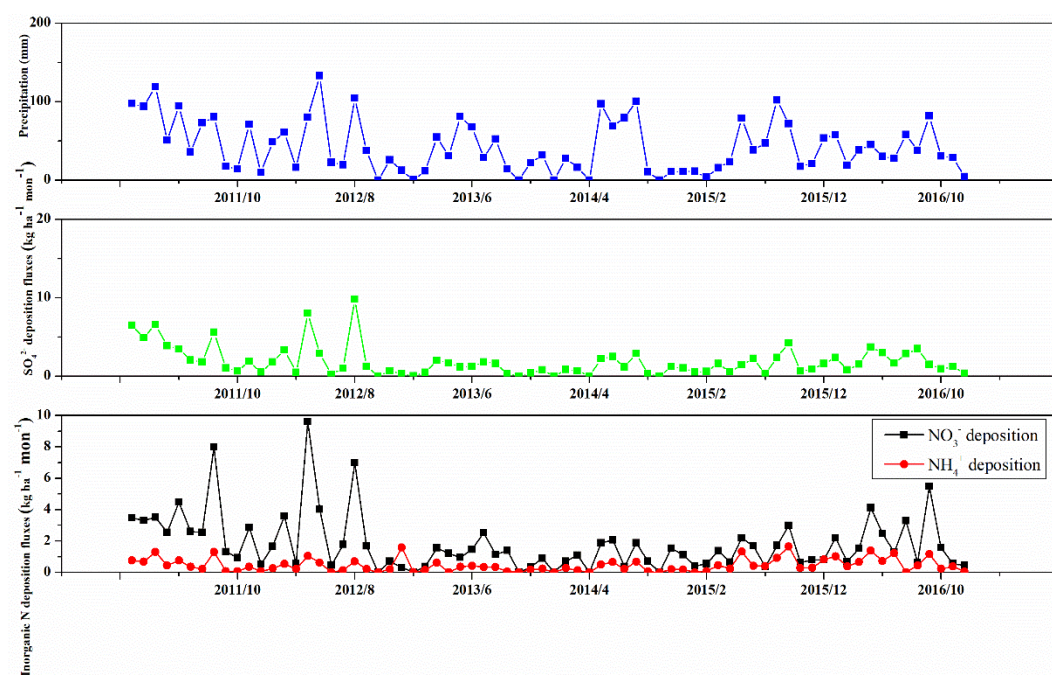



**Fig. S29** The precipitation and wet deposition fluxes of secondary ions in Fushun

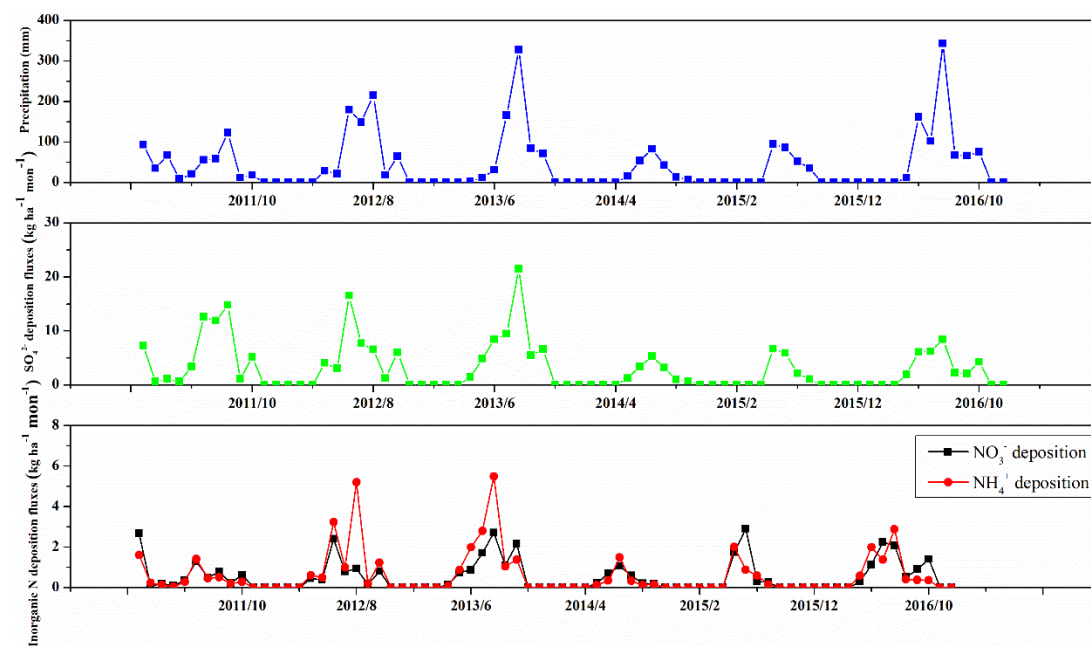

**Fig. S30** The precipitation and wet deposition fluxes of secondary ions in Fuzhou

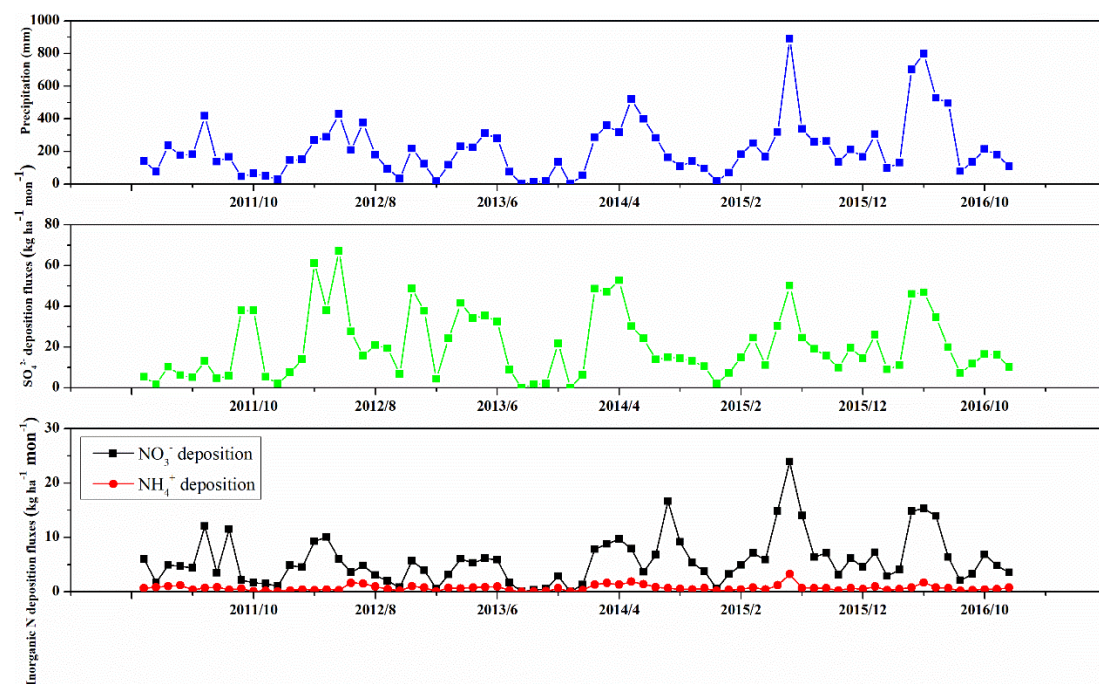

**Fig. S31** The precipitation and wet deposition fluxes of secondary ions in Fuxin

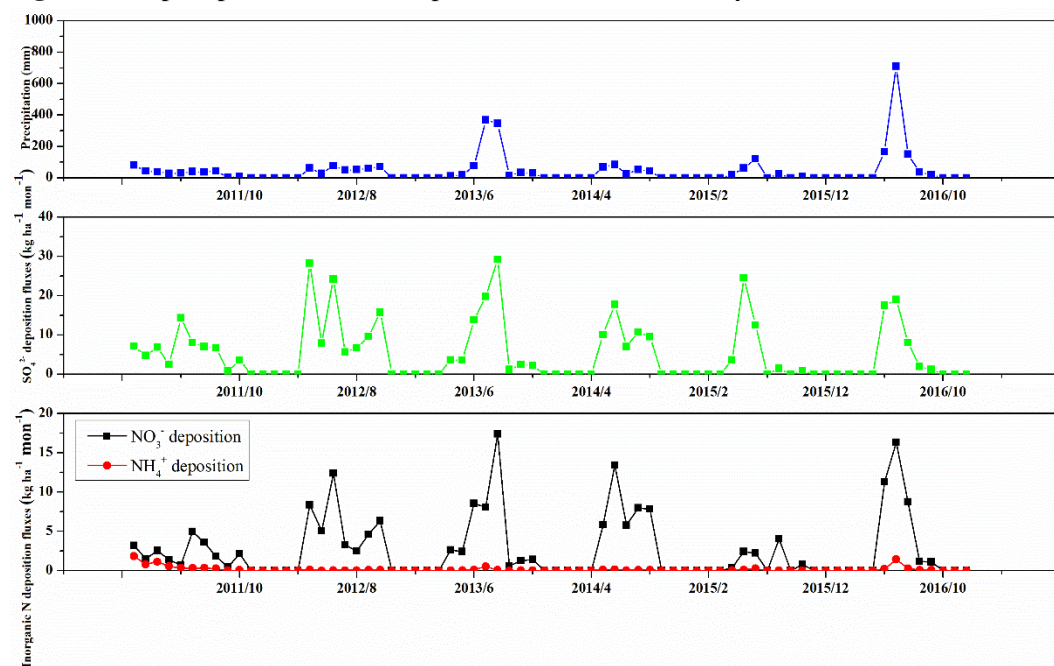

**Fig. S32** The precipitation and wet deposition fluxes of secondary ions in Fuyang

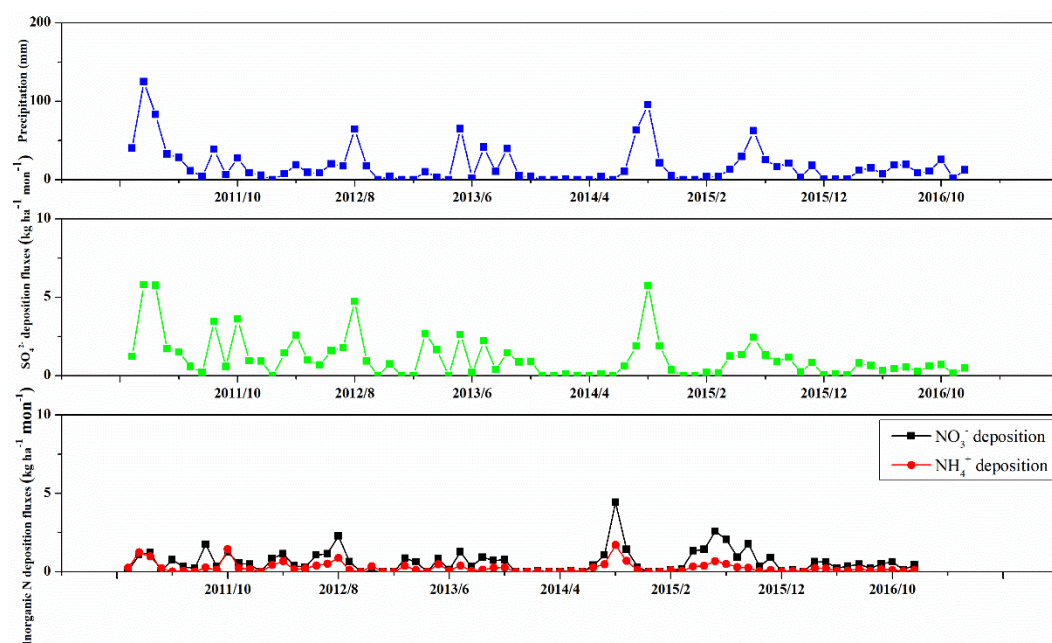

**Fig. S33** The precipitation and wet deposition fluxes of secondary ions in Ganzhou

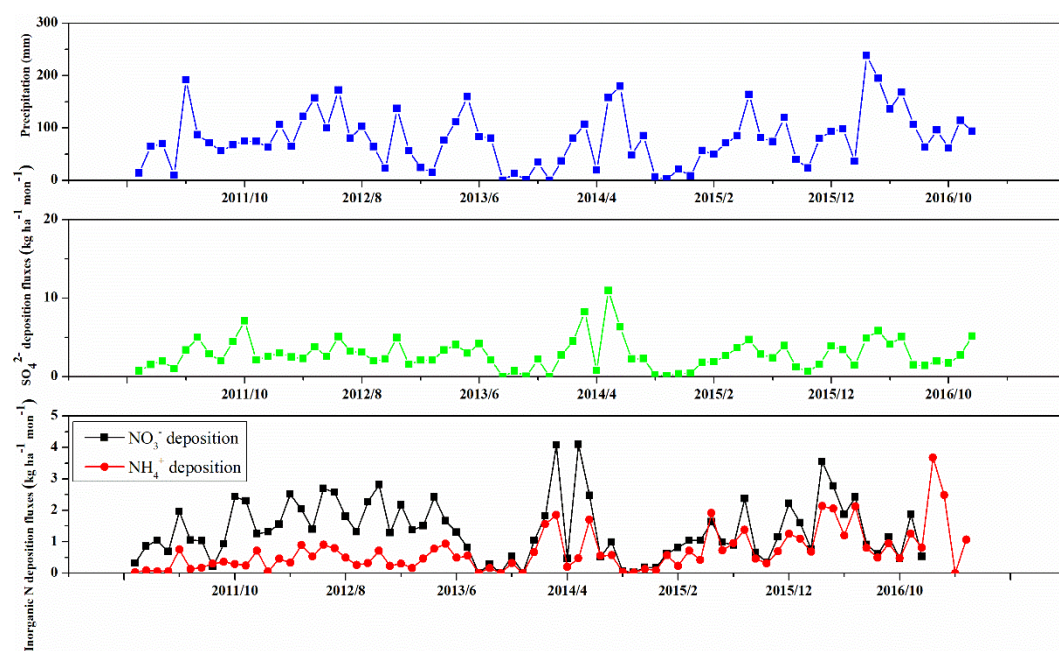

**Fig. S34** The precipitation and wet deposition fluxes of secondary ions in Guyuan

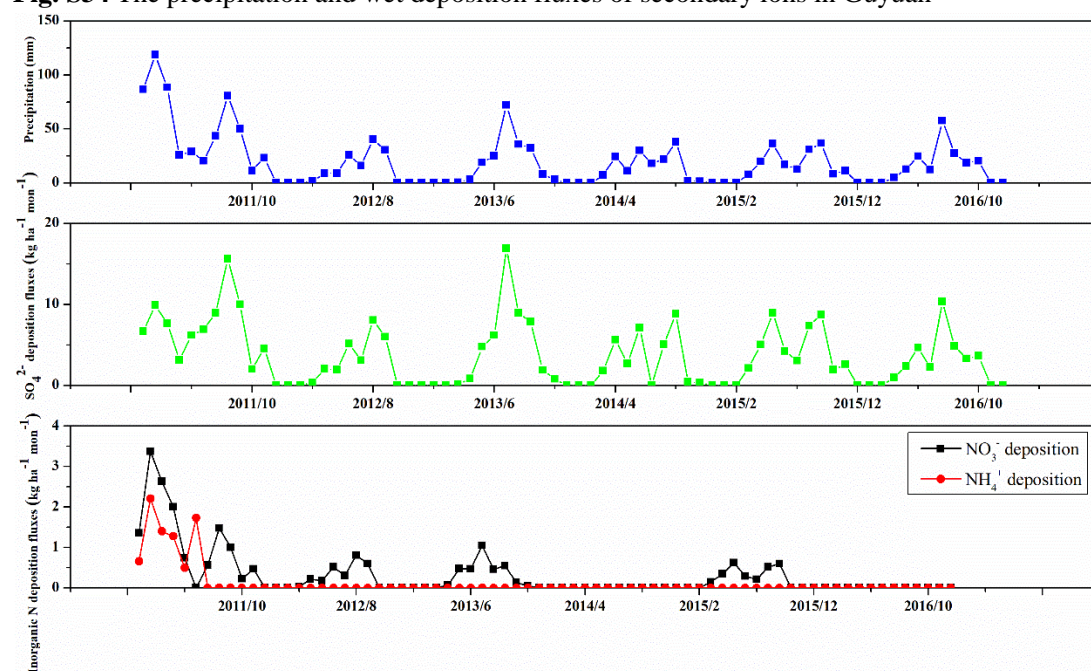



**Fig. S35** The precipitation and wet deposition fluxes of secondary ions in Guangyuan

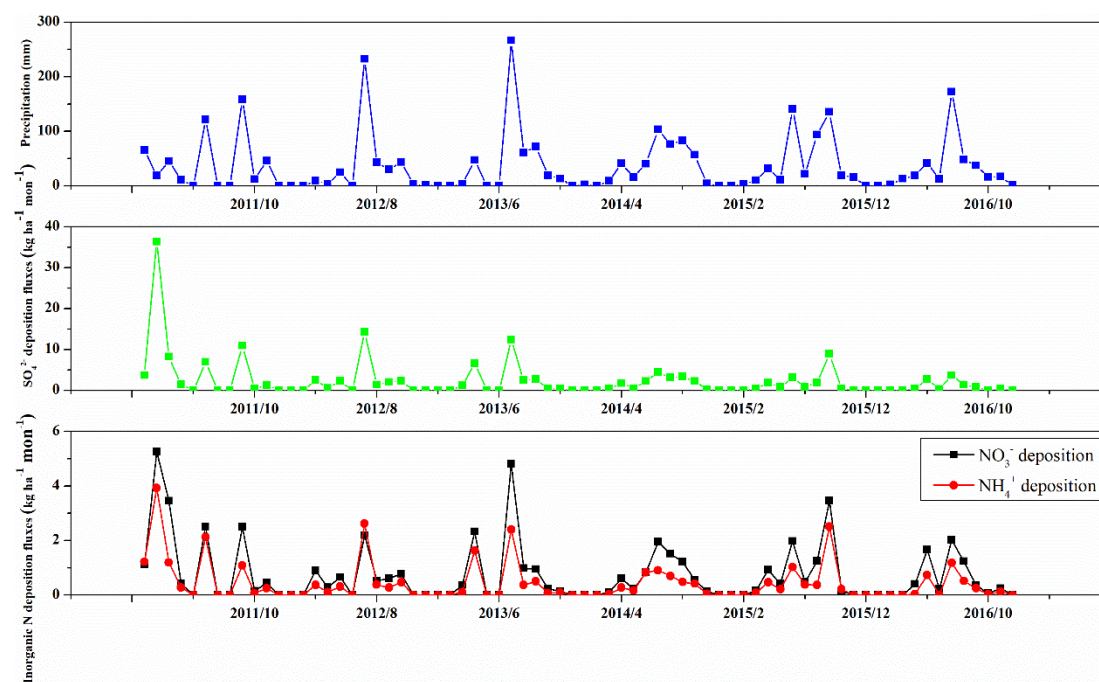

**Fig. S36** The precipitation and wet deposition fluxes of secondary ions in Guangzhou

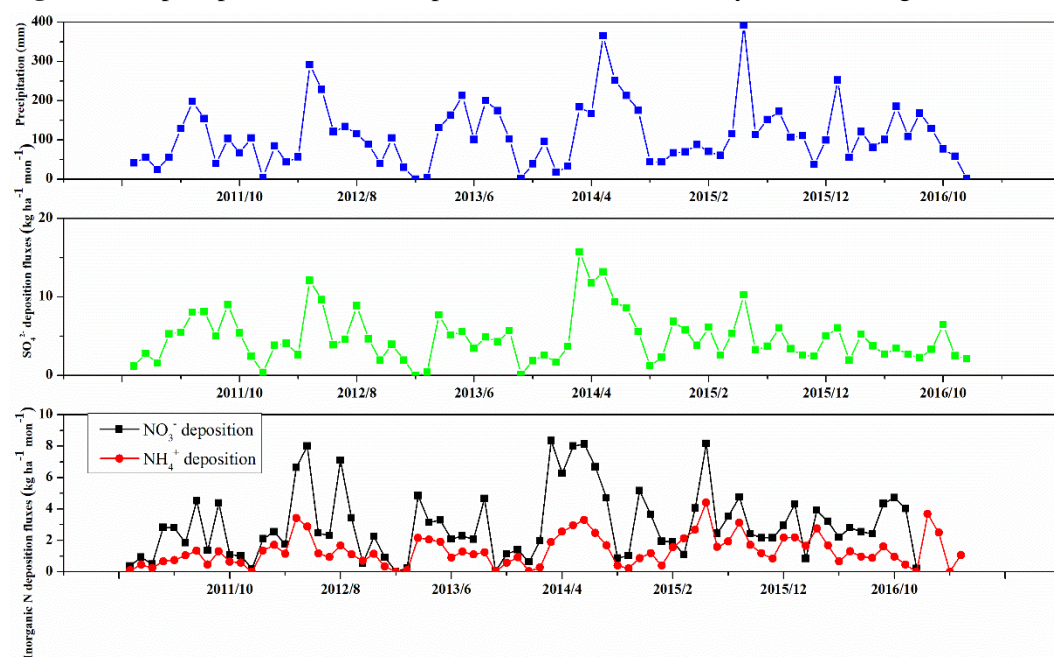

**Fig. S37** The precipitation and wet deposition fluxes of secondary ions in Harbin

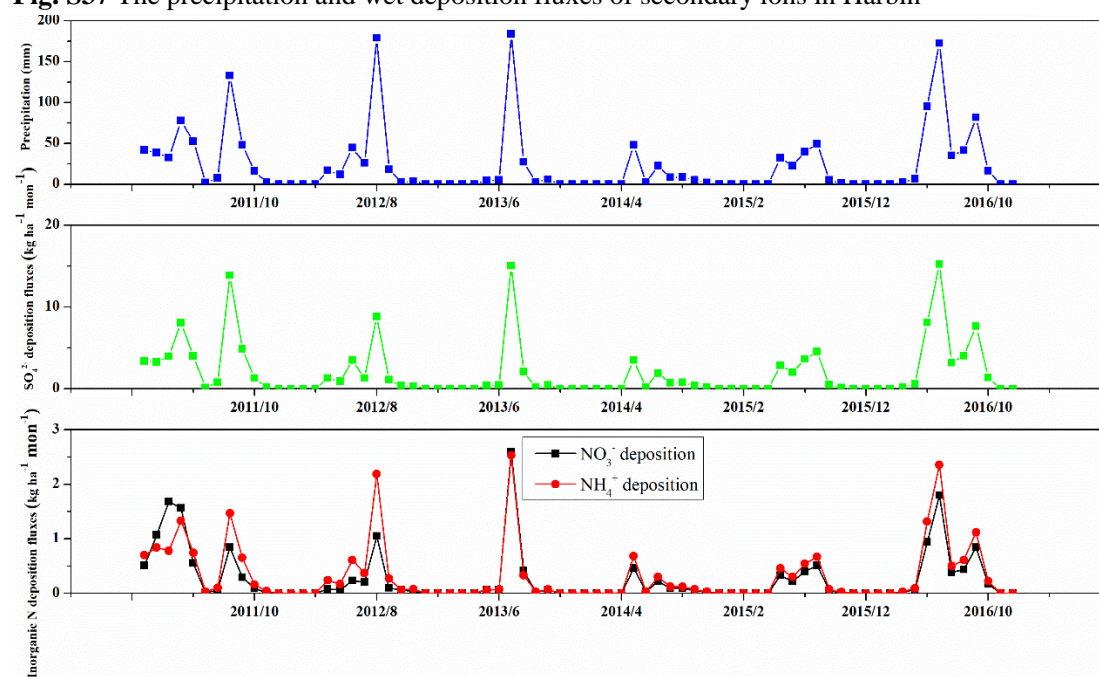

**Fig. S38** The precipitation and wet deposition fluxes of secondary ions in Haikou

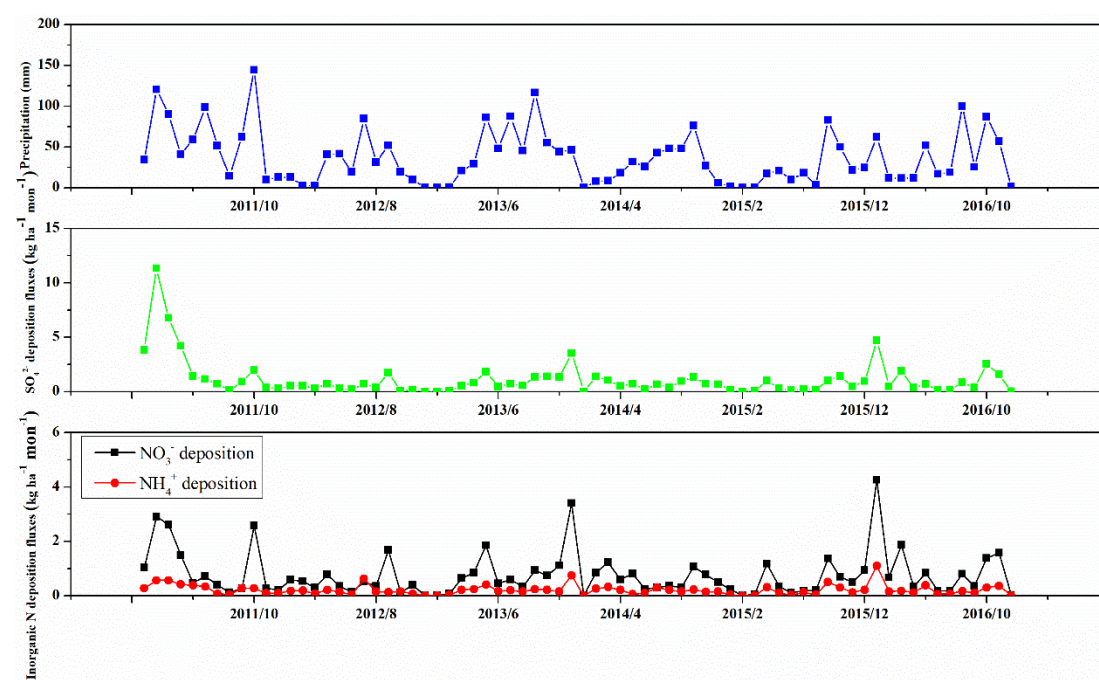

**Fig. S39** The precipitation and wet deposition fluxes of secondary ions in Hefei

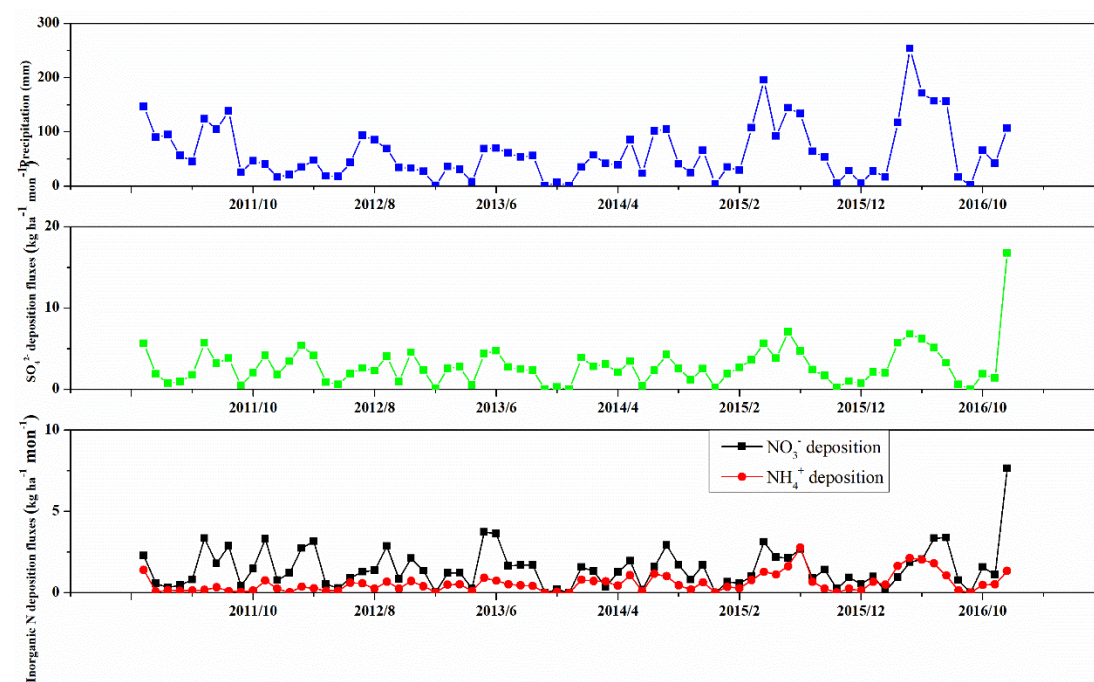

**Fig. S40** The precipitation and wet deposition fluxes of secondary ions in Heze

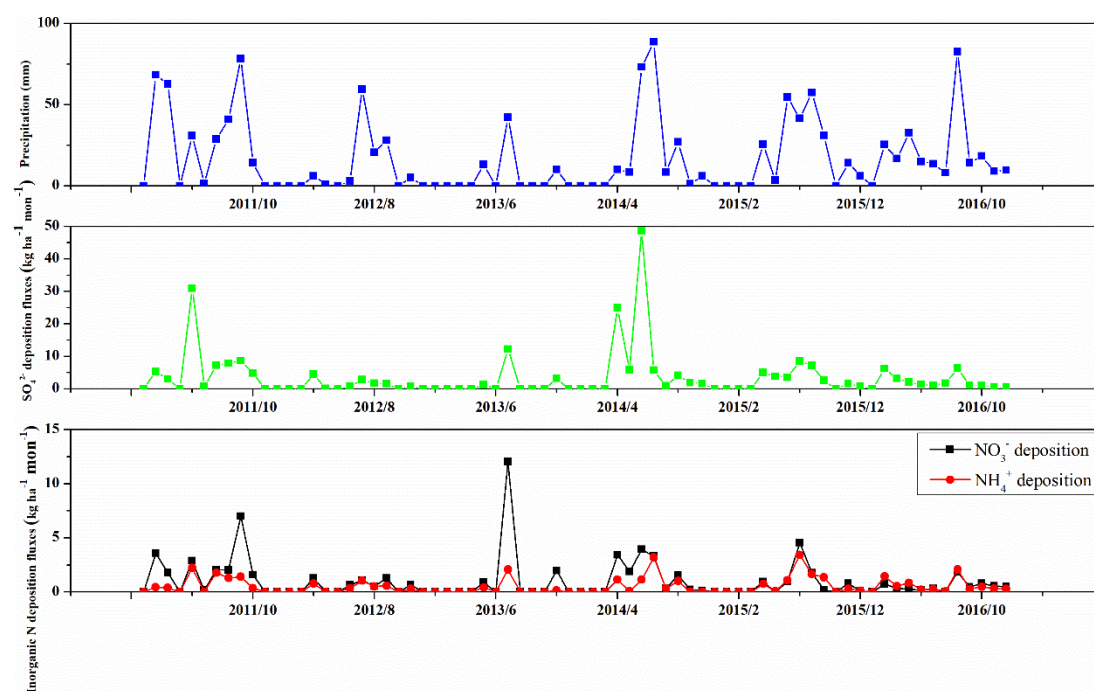



**Fig. S41** The precipitation and wet deposition fluxes of secondary ions in Hengshui

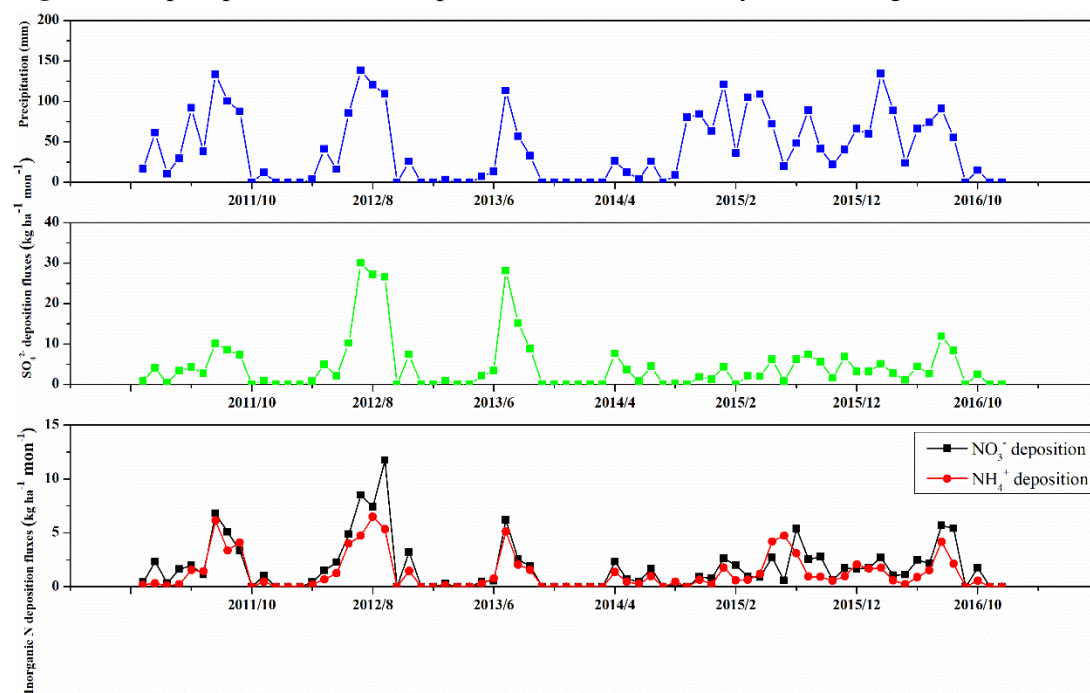

**Fig. S42** The precipitation and wet deposition fluxes of secondary ions in Hohehot

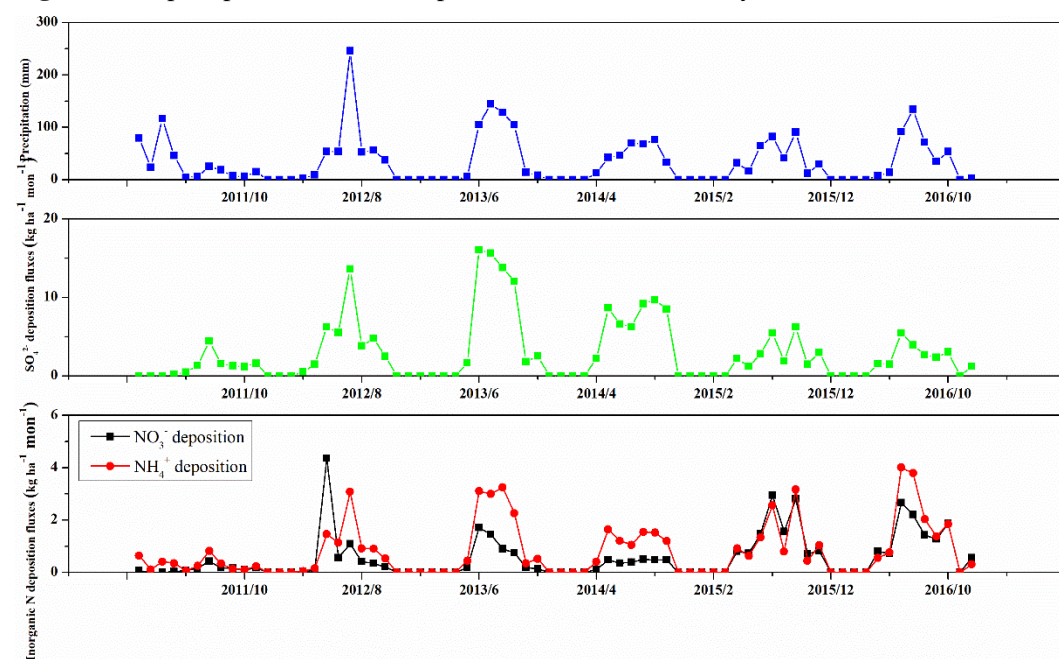

**Fig. S43** The precipitation and wet deposition fluxes of secondary ions in Huaian

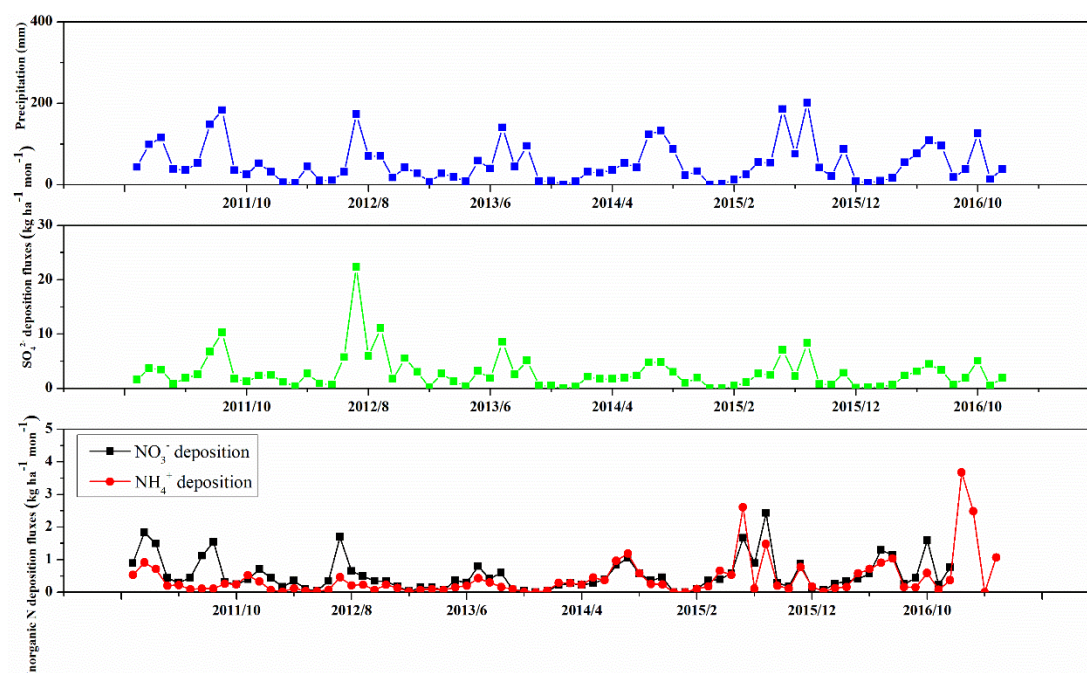

**Fig. S44** The precipitation and wet deposition fluxes of secondary ions in Huangshan

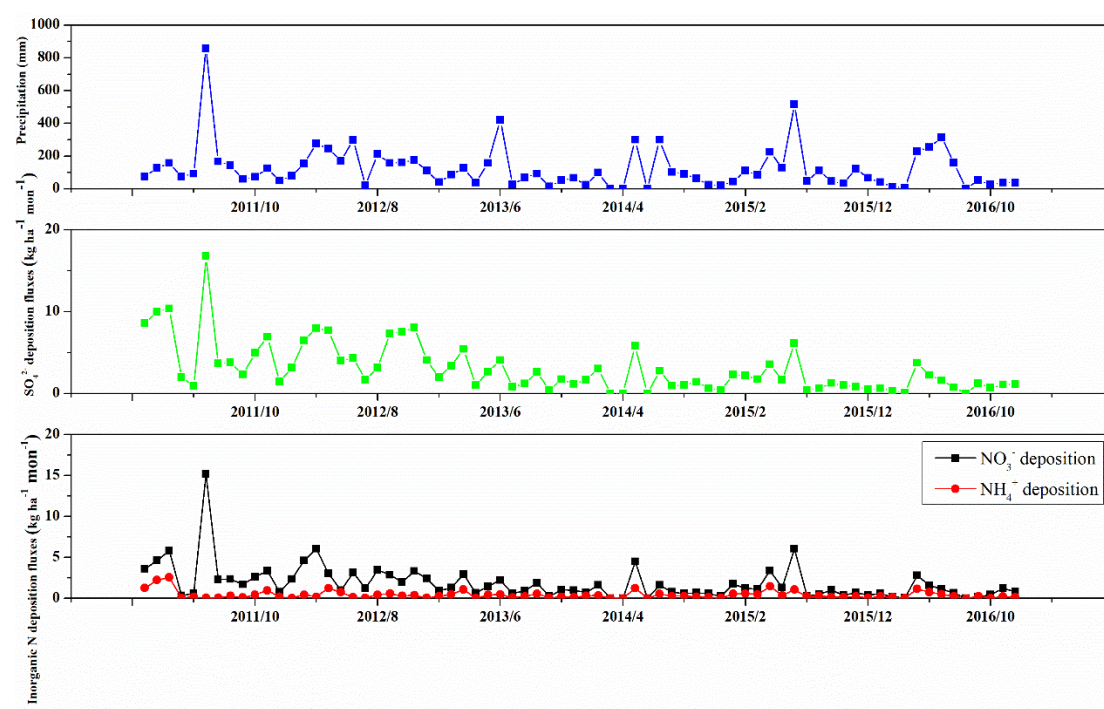

**Fig. S45** The precipitation and wet deposition fluxes of secondary ions in Huizhou

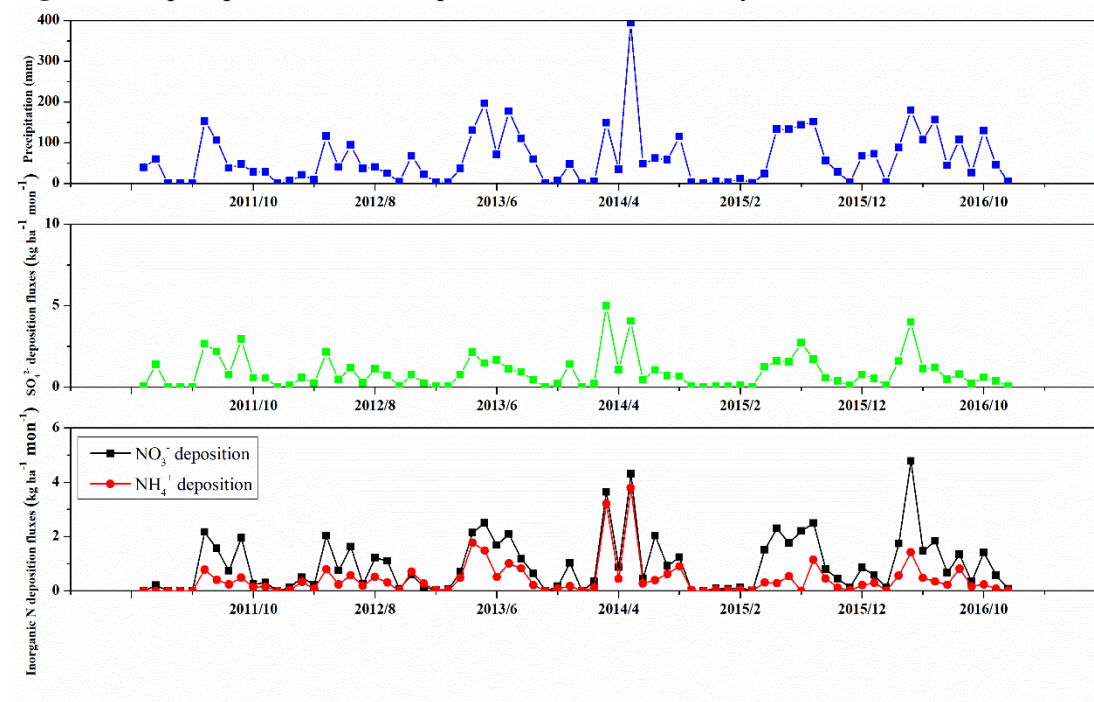



**Fig. S46** The precipitation and wet deposition fluxes of secondary ions in Jixi

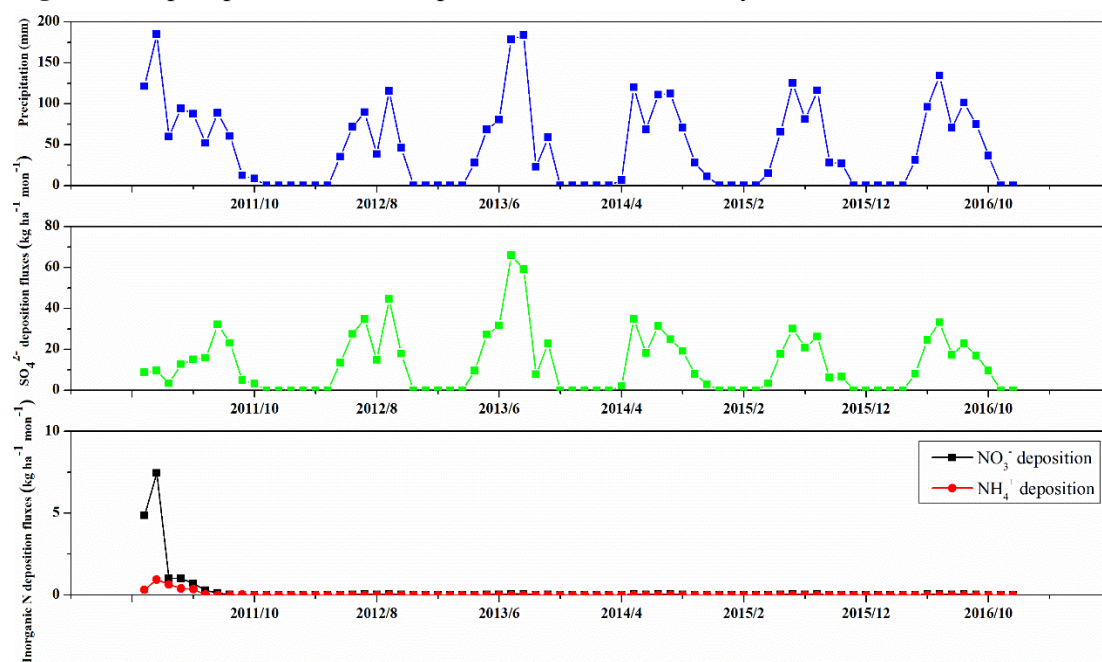



**Fig. S47** The precipitation and wet deposition fluxes of secondary ions in Ji'an

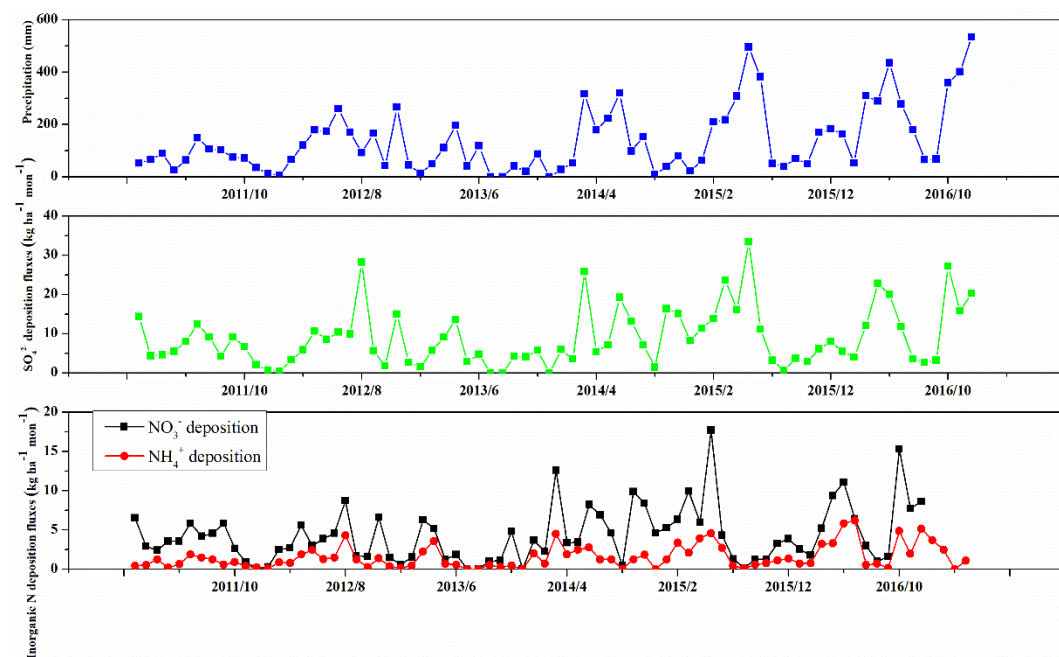

**Fig. S48** The precipitation and wet deposition fluxes of secondary ions in Jilin

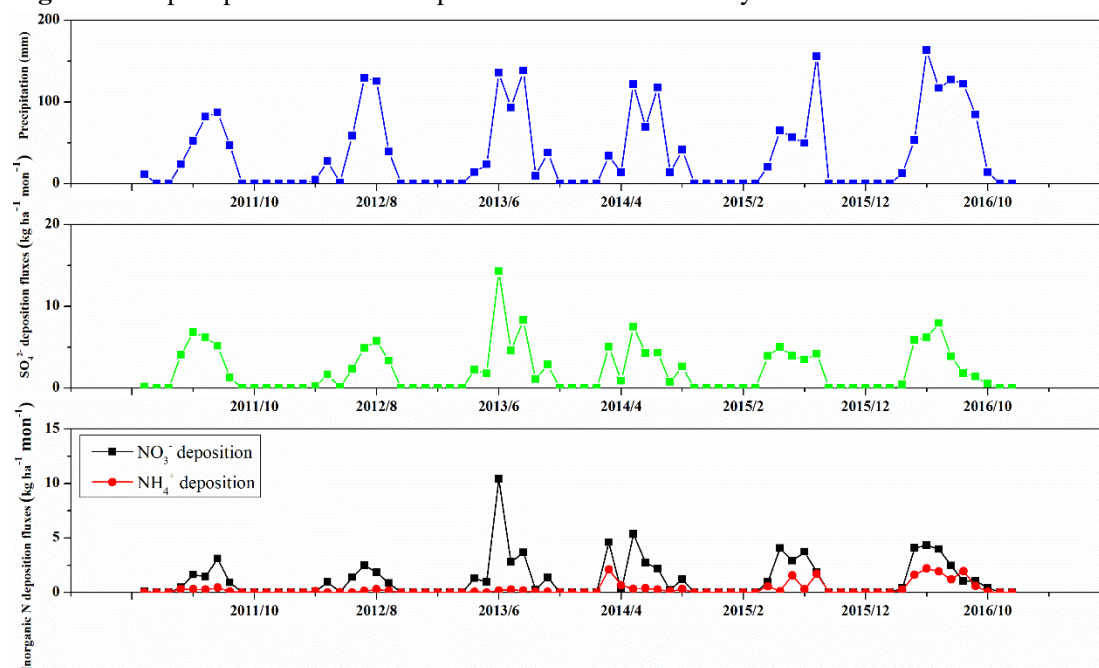

**Fig. S49** The precipitation and wet deposition fluxes of secondary ions in Jining

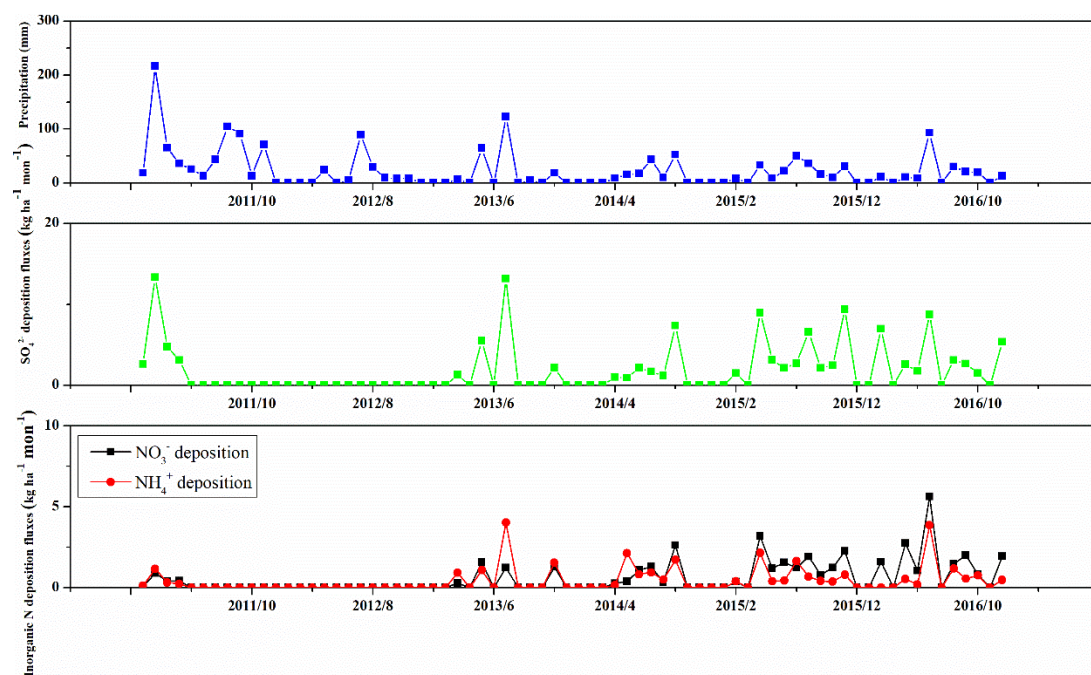

**Fig. S50** The precipitation and wet deposition fluxes of secondary ions in Jiamusi

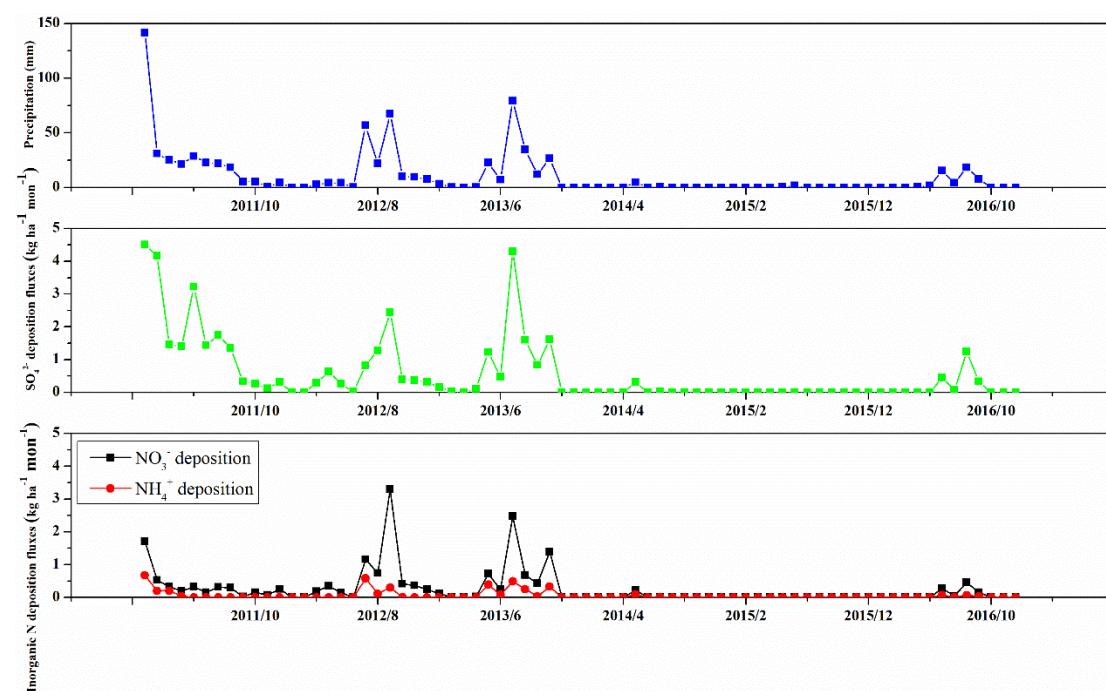

**Fig. S51** The precipitation and wet deposition fluxes of secondary ions in Jiaozuo

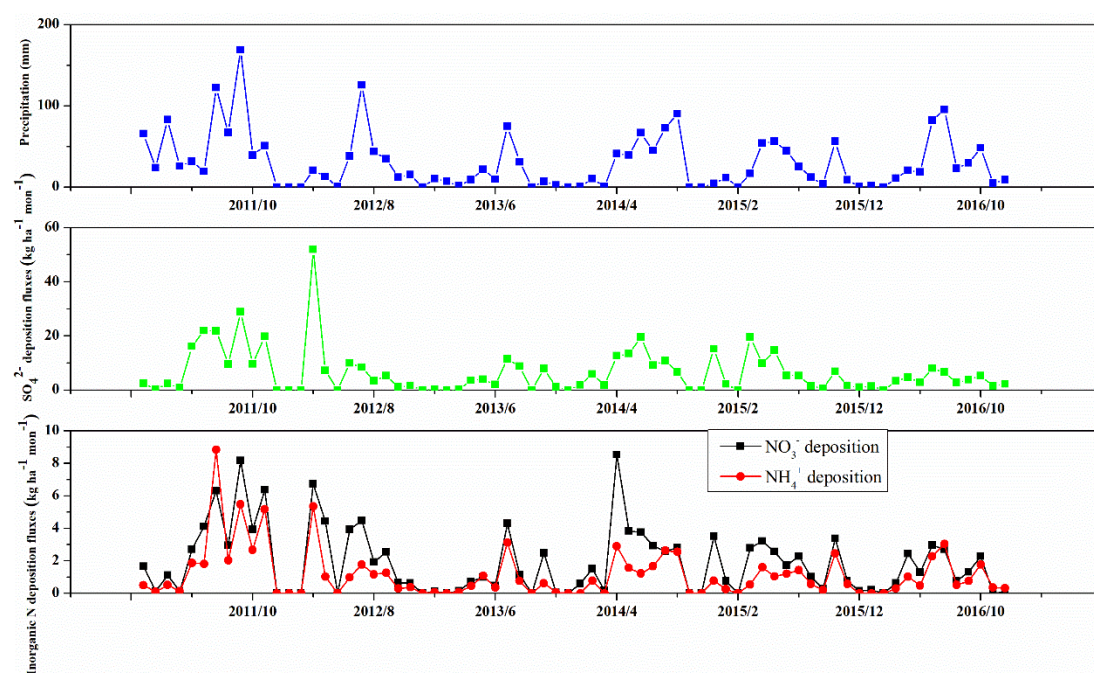



**Fig. S52** The precipitation and wet deposition fluxes of secondary ions in Jinzhou

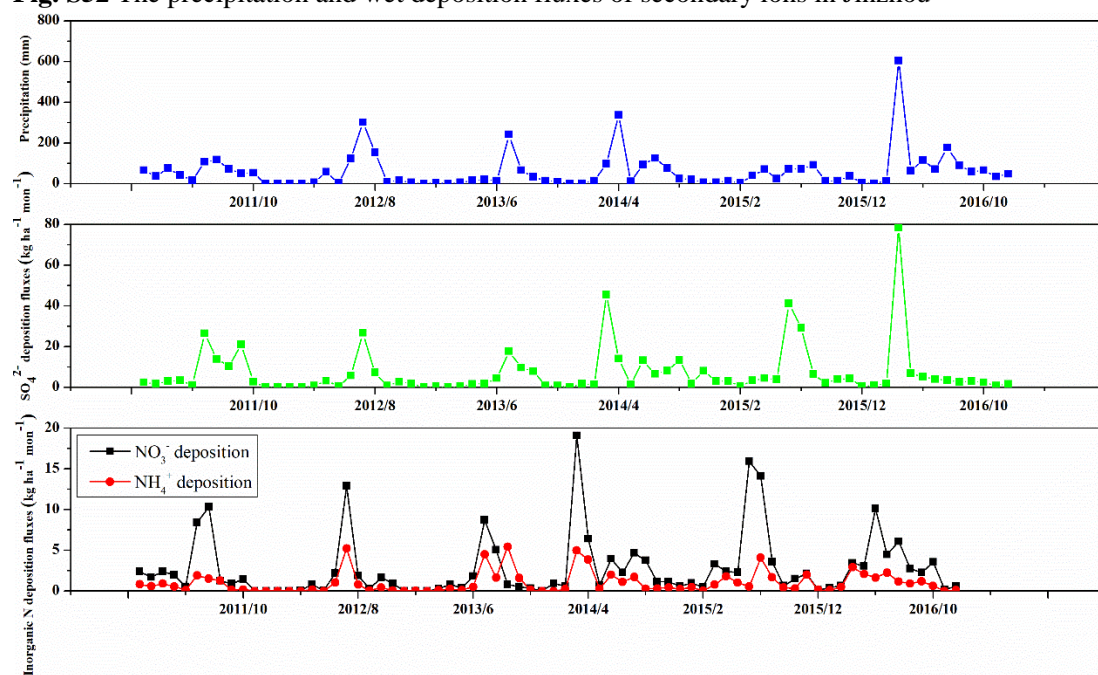



**Fig. S53** The precipitation and wet deposition fluxes of secondary ions in Jingdezhen

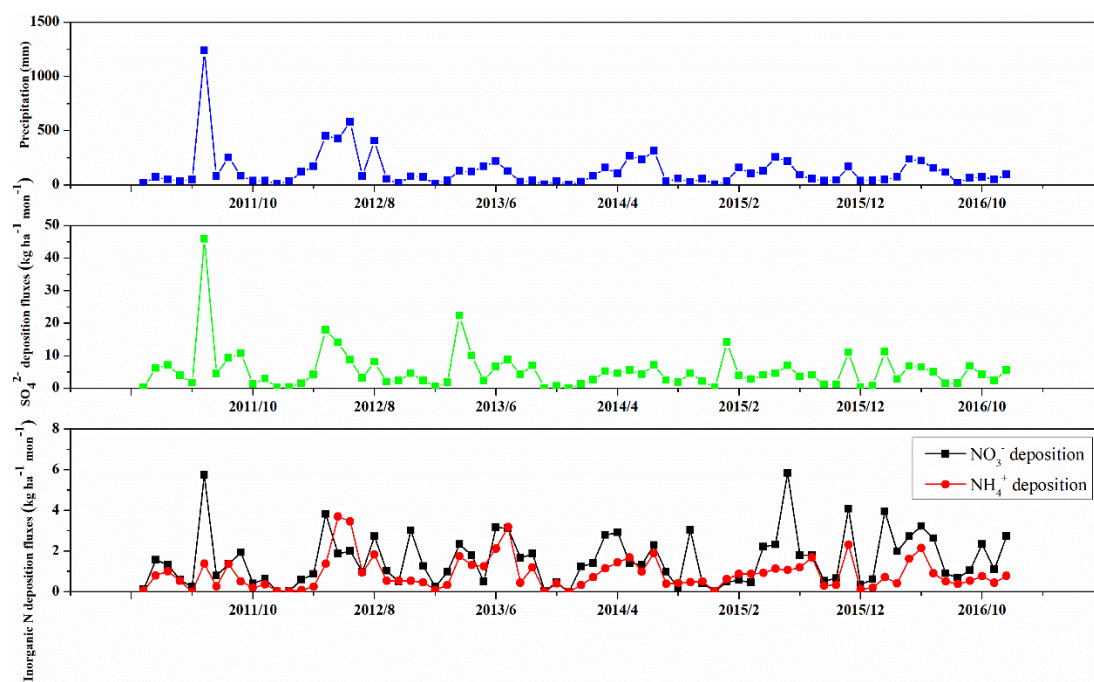

**Fig. S54** The precipitation and wet deposition fluxes of secondary ions in Jiujiang

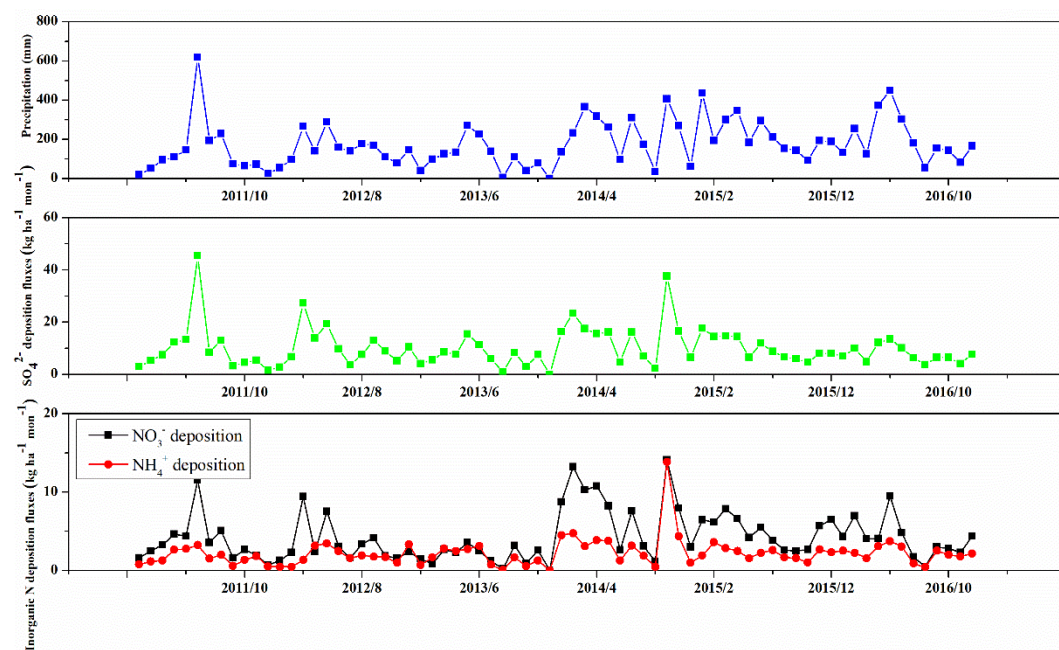

**Fig. S55** The precipitation and wet deposition fluxes of secondary ions in Kaifeng

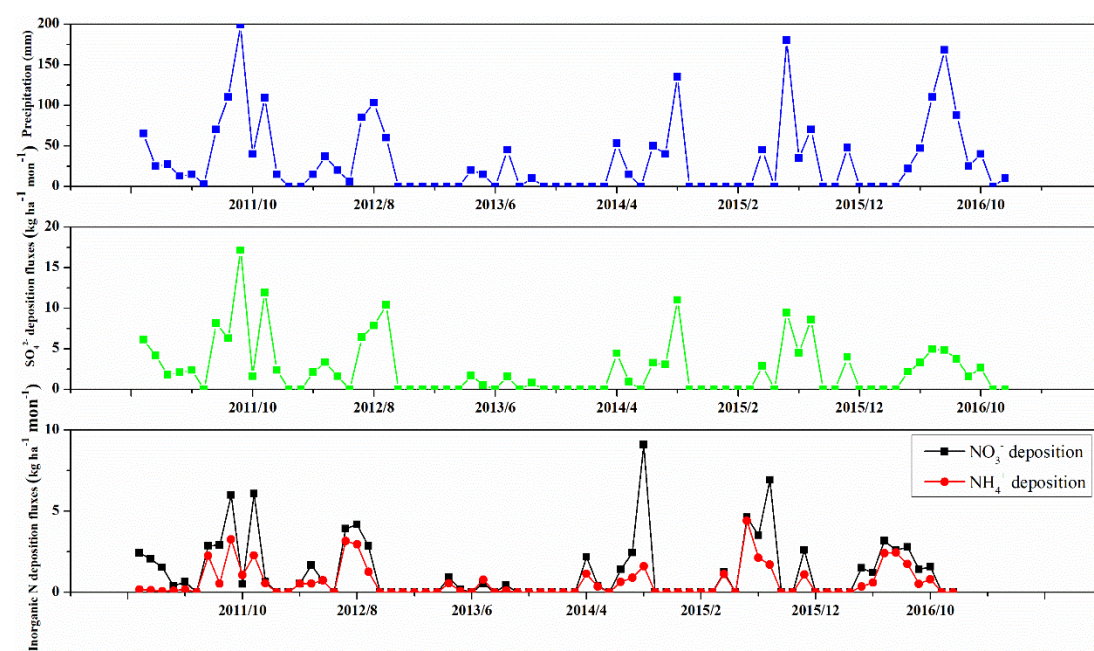

**Fig. S56** The precipitation and wet deposition fluxes of secondary ions in Lijiang

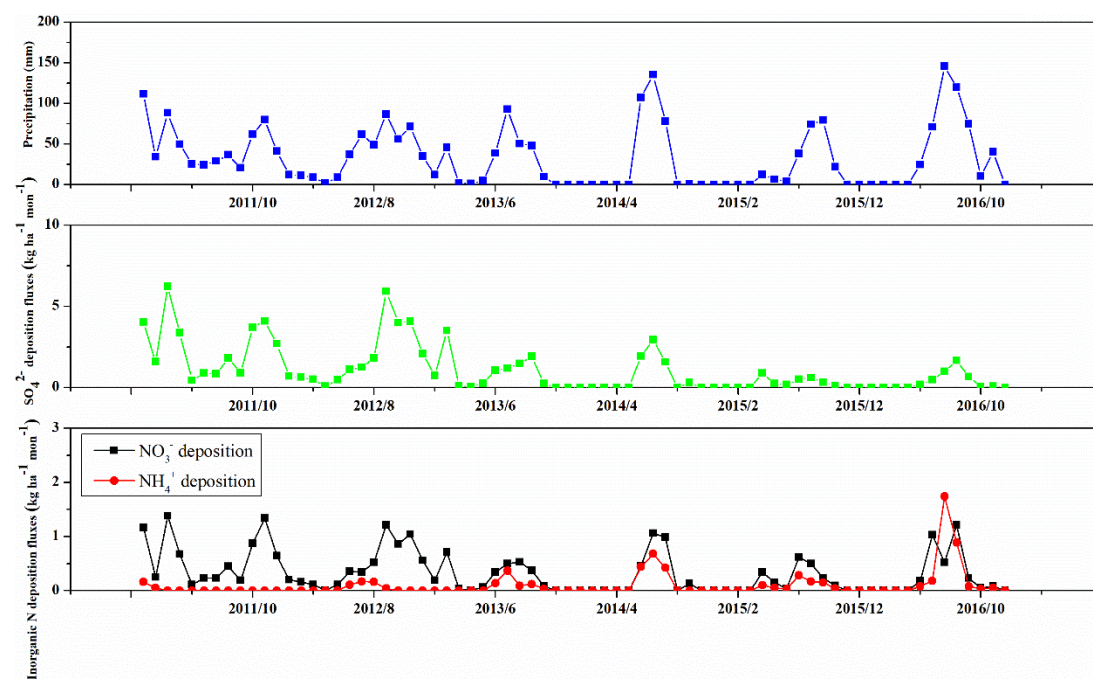

**Fig. S57** The precipitation and wet deposition fluxes of secondary ions in Lianyungang

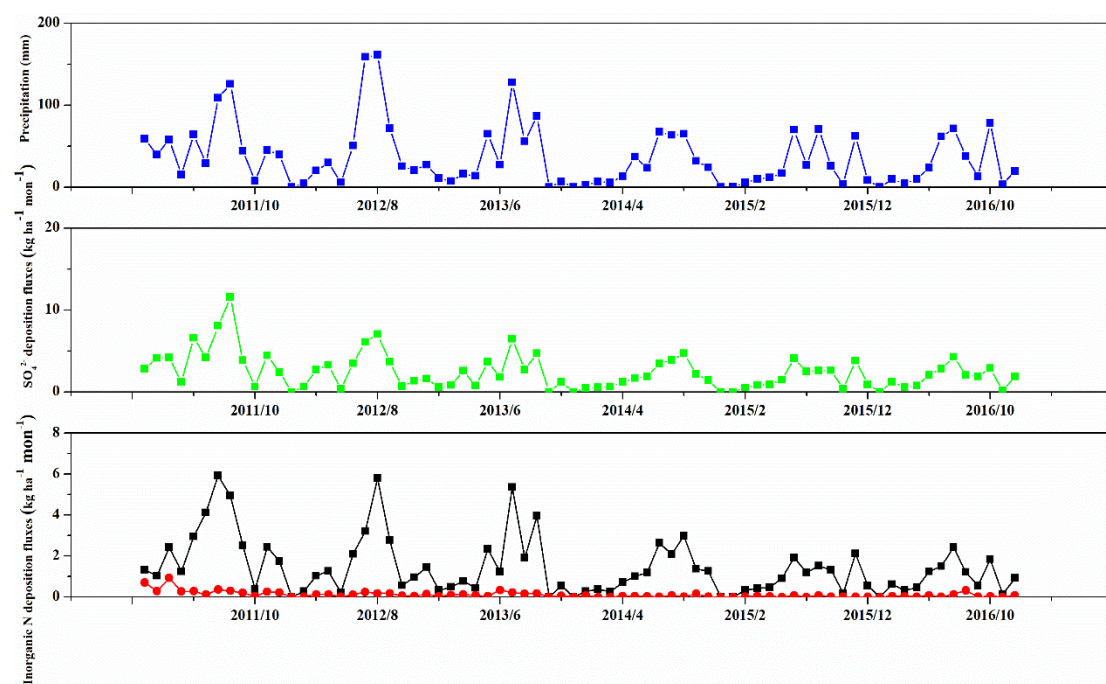

**Fig. S58** The precipitation and wet deposition fluxes of secondary ions in Liangshan

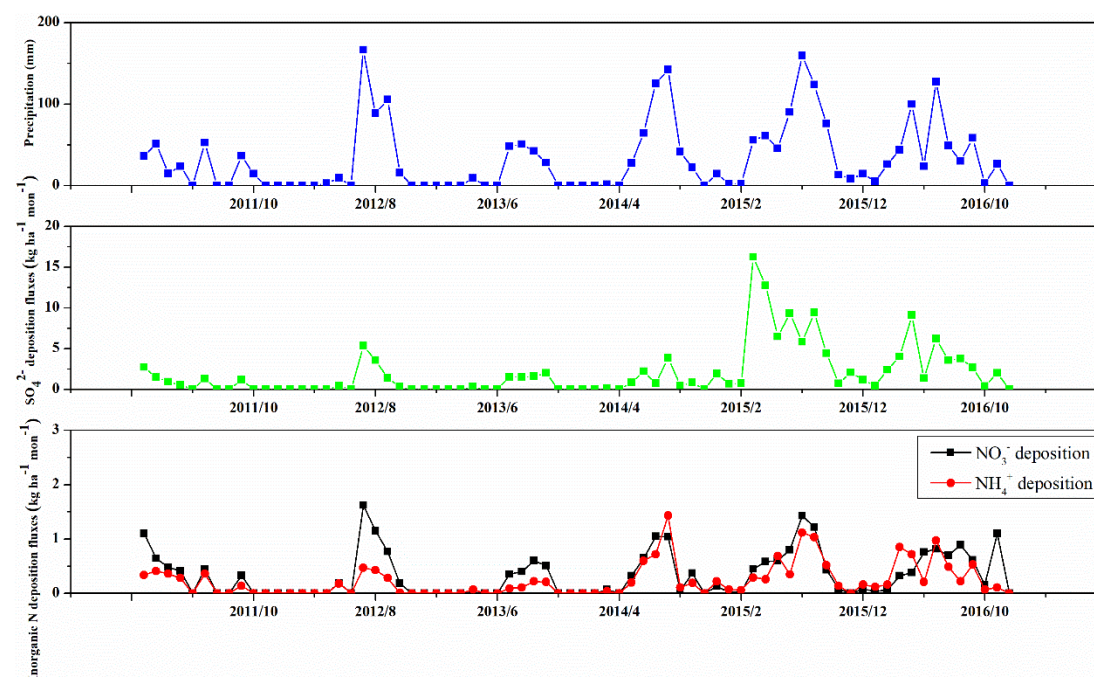



**Fig. S59** The precipitation and wet deposition fluxes of secondary ions in Liaoyuan

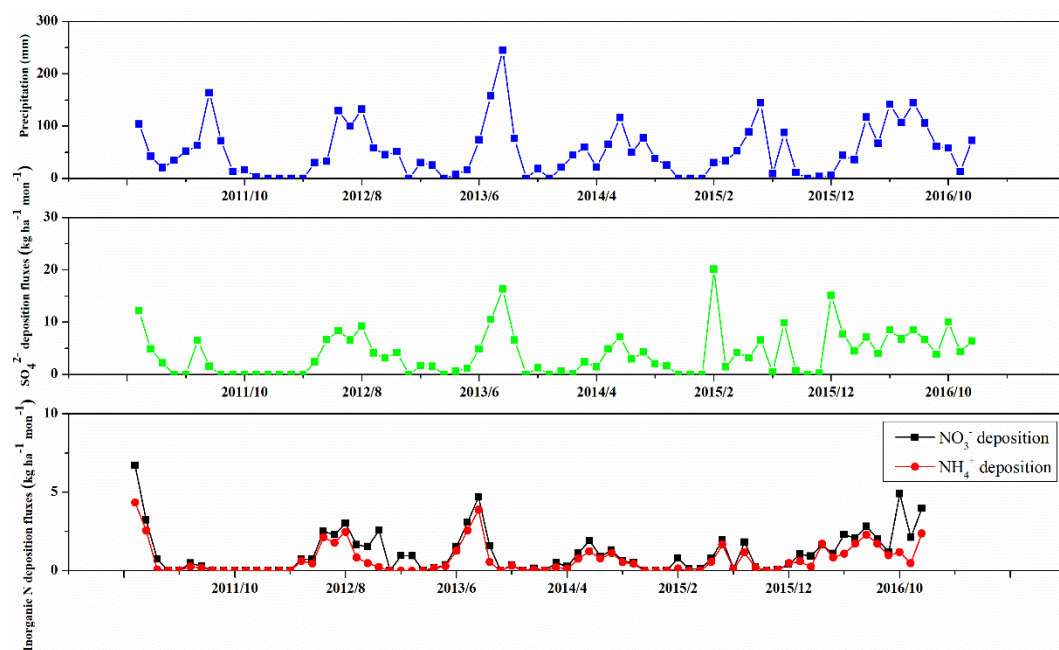

**Fig. S60** The precipitation and wet deposition fluxes of secondary ions in Liaocheng

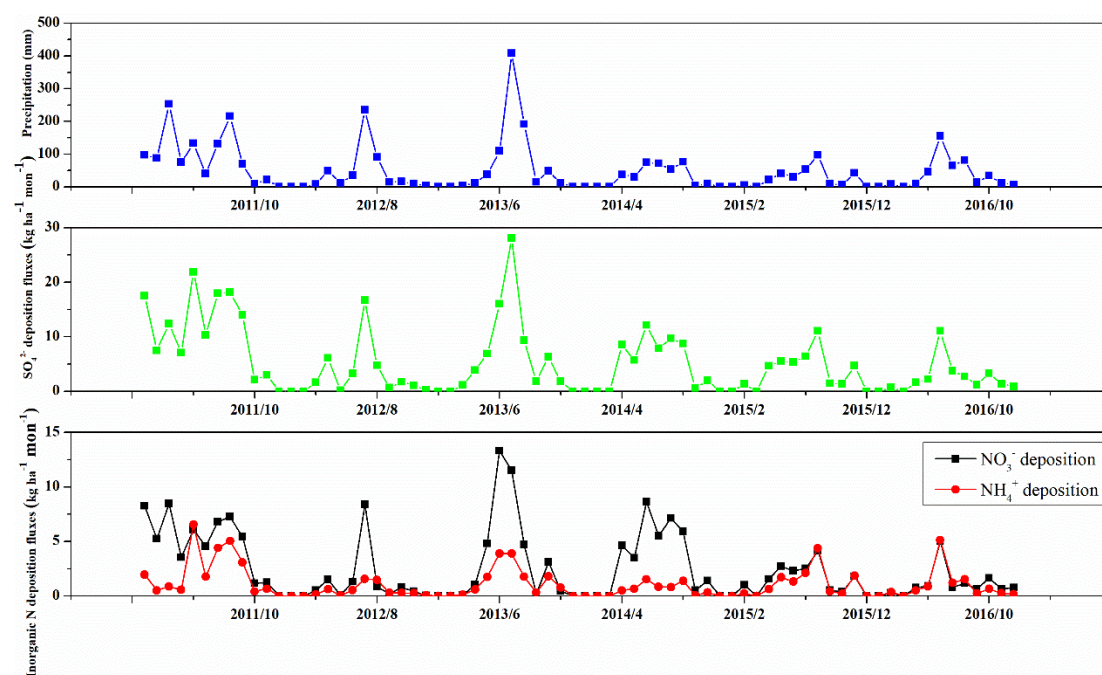

**Fig. S61** The precipitation and wet deposition fluxes of secondary ions in Linyi

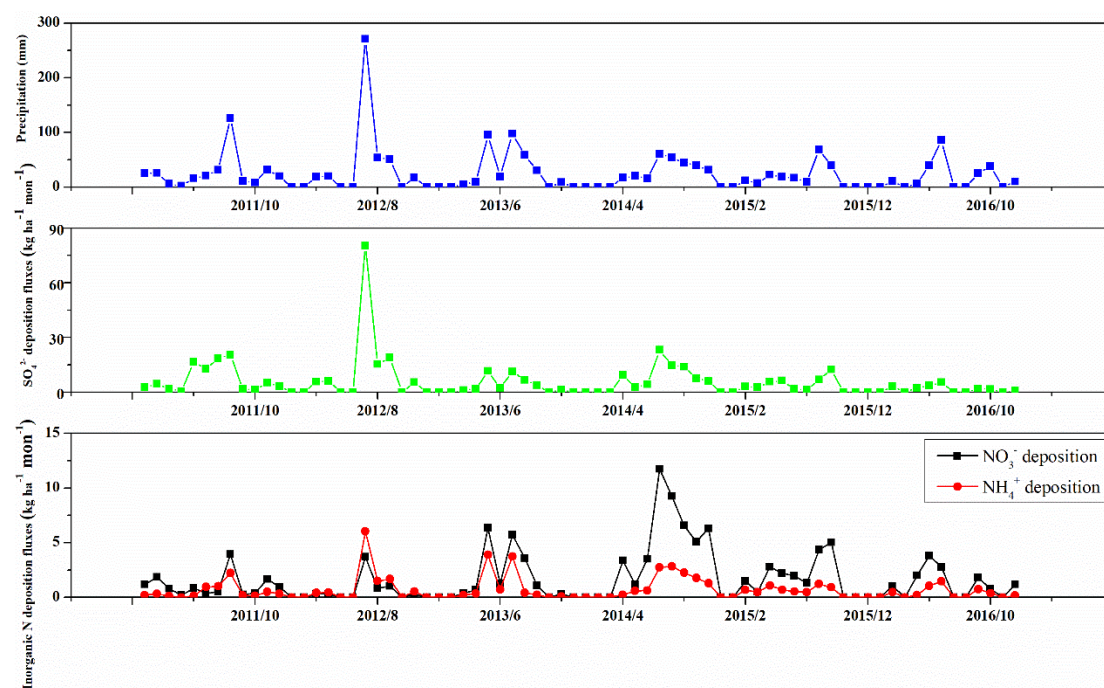

**Fig. S62** The precipitation and wet deposition fluxes of secondary ions in Lu'an

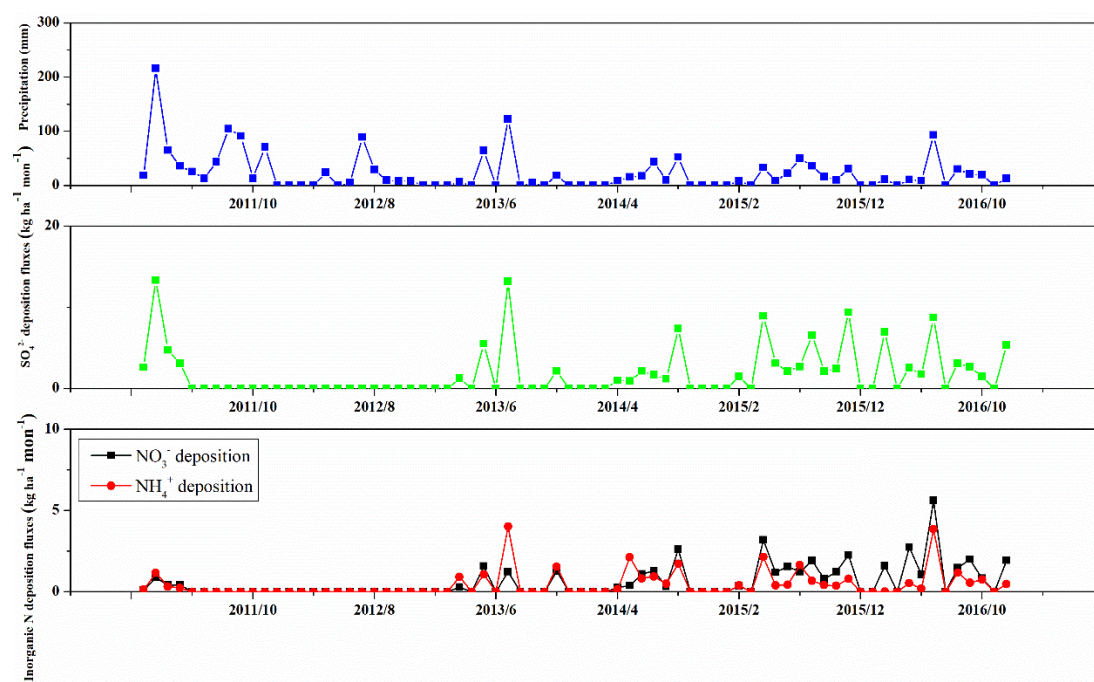

**Fig. S63** The precipitation and wet deposition fluxes of secondary ions in Luzhou

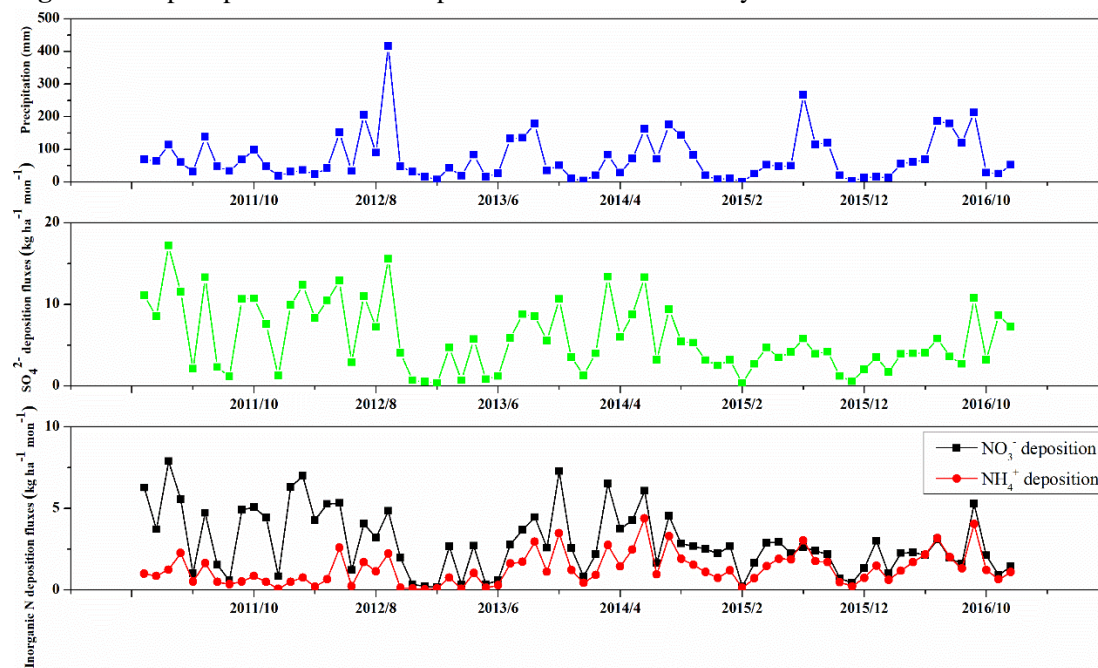

**Fig. S64** The precipitation and wet deposition fluxes of secondary ions in Lvliang

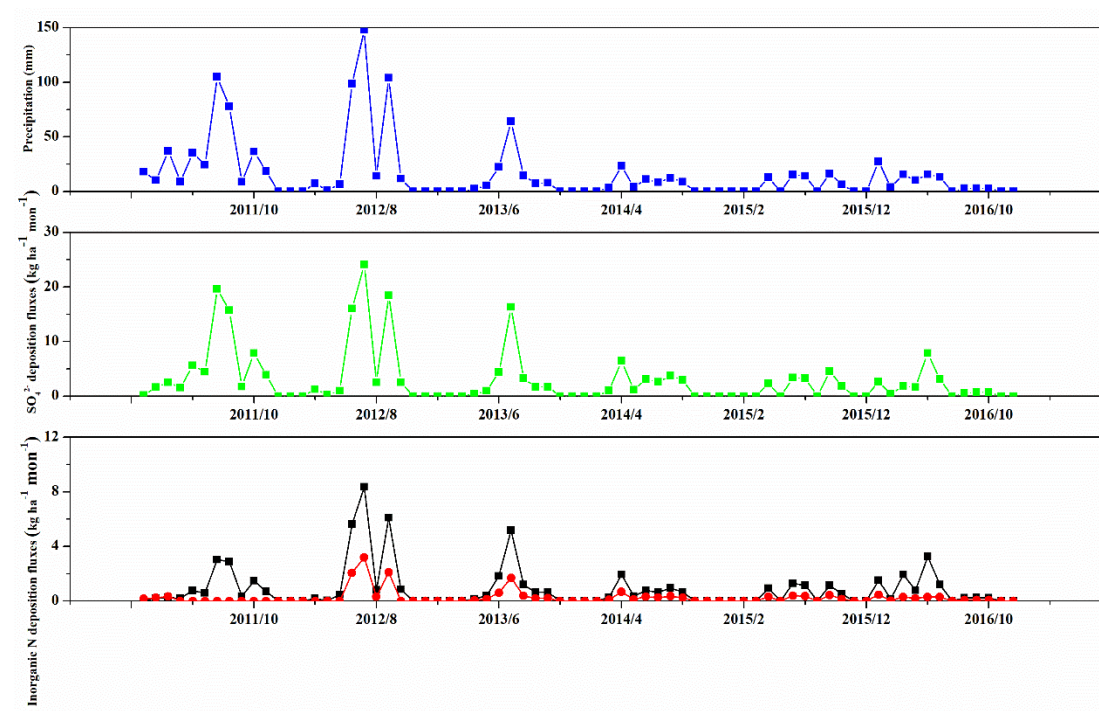



**Fig. S65** The precipitation and wet deposition fluxes of secondary ions in Mudanjiang

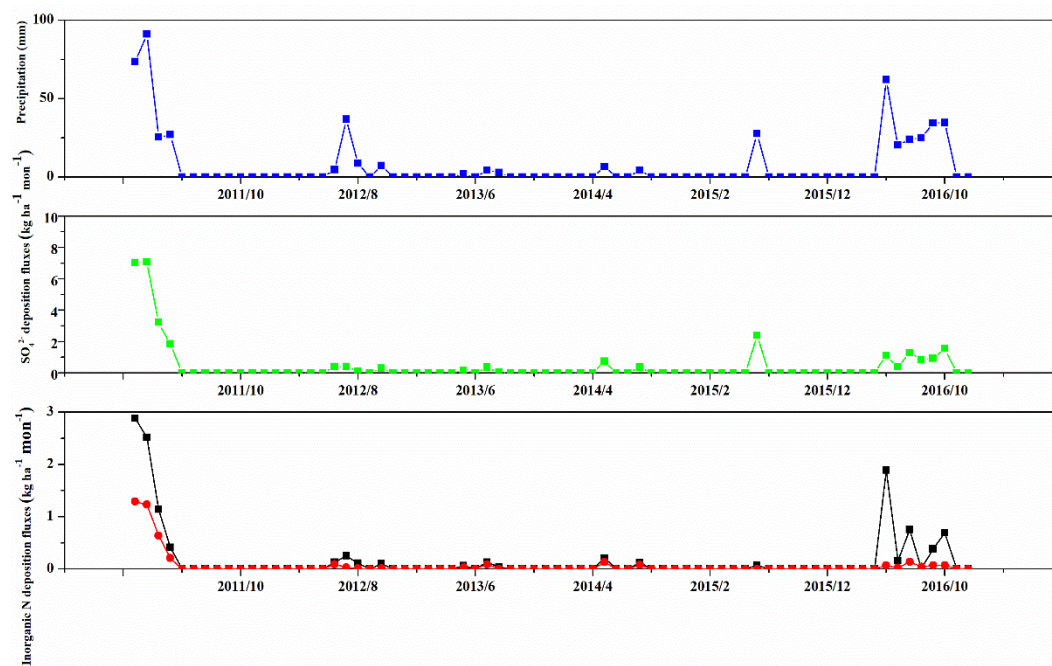

**Fig. S66** The precipitation and wet deposition fluxes of secondary ions in Nanjing

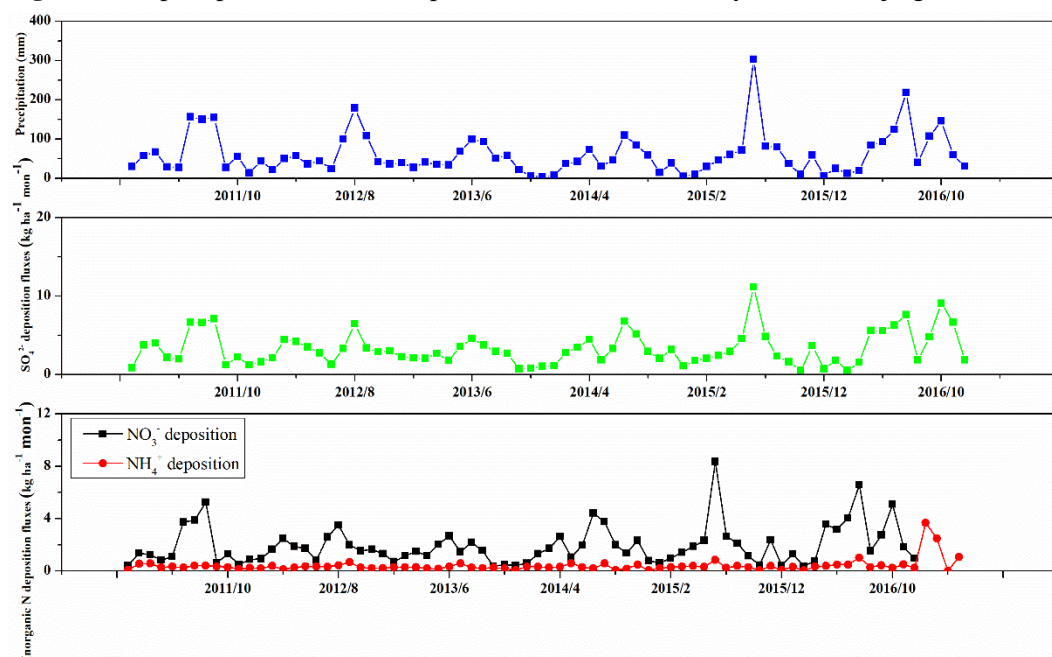

**Fig. S67** The precipitation and wet deposition fluxes of secondary ions in Nantong

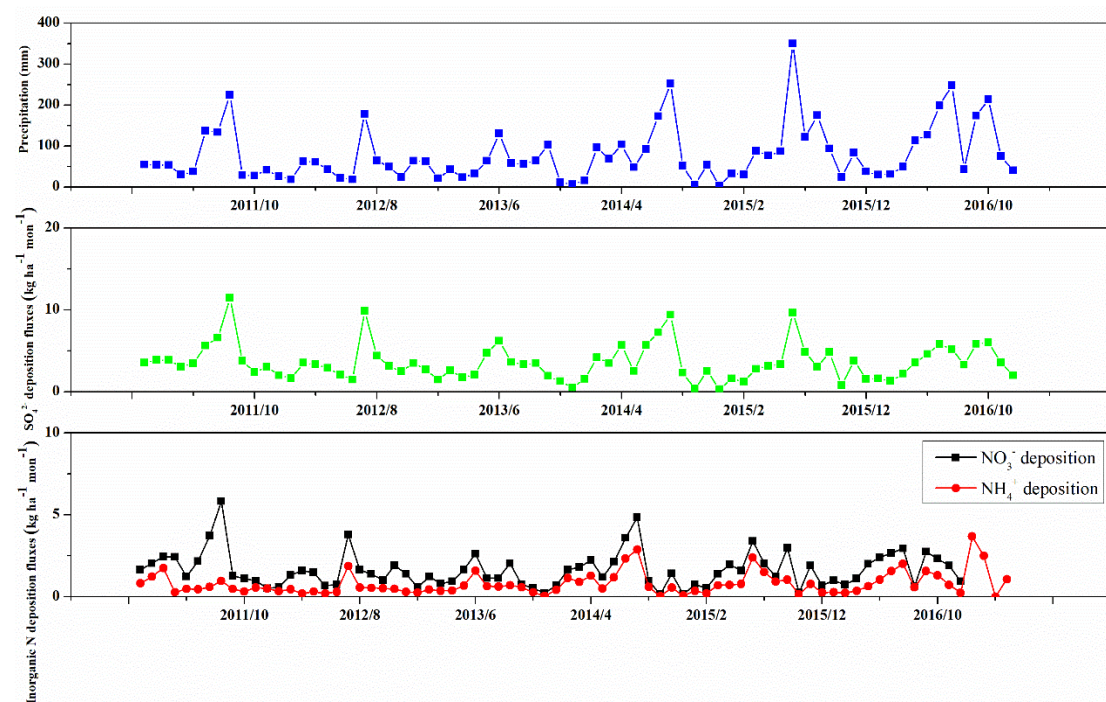

**Fig. S68** The precipitation and wet deposition fluxes of secondary ions in Nanyang

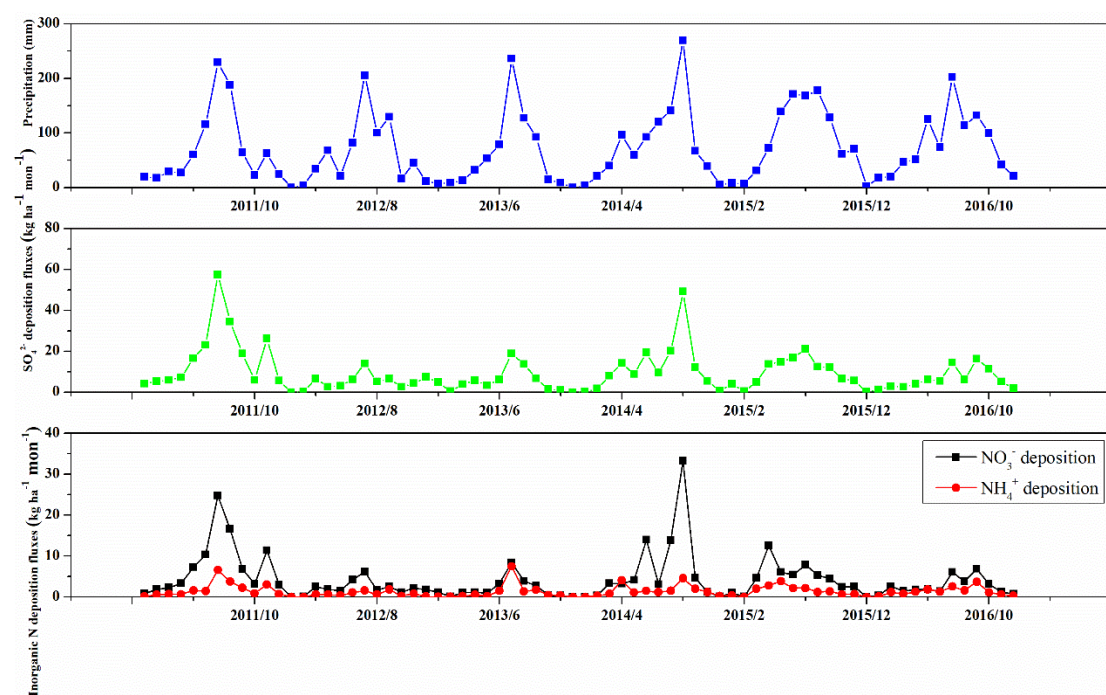

**Fig. S69** The precipitation and wet deposition fluxes of secondary ions in Panzhihua

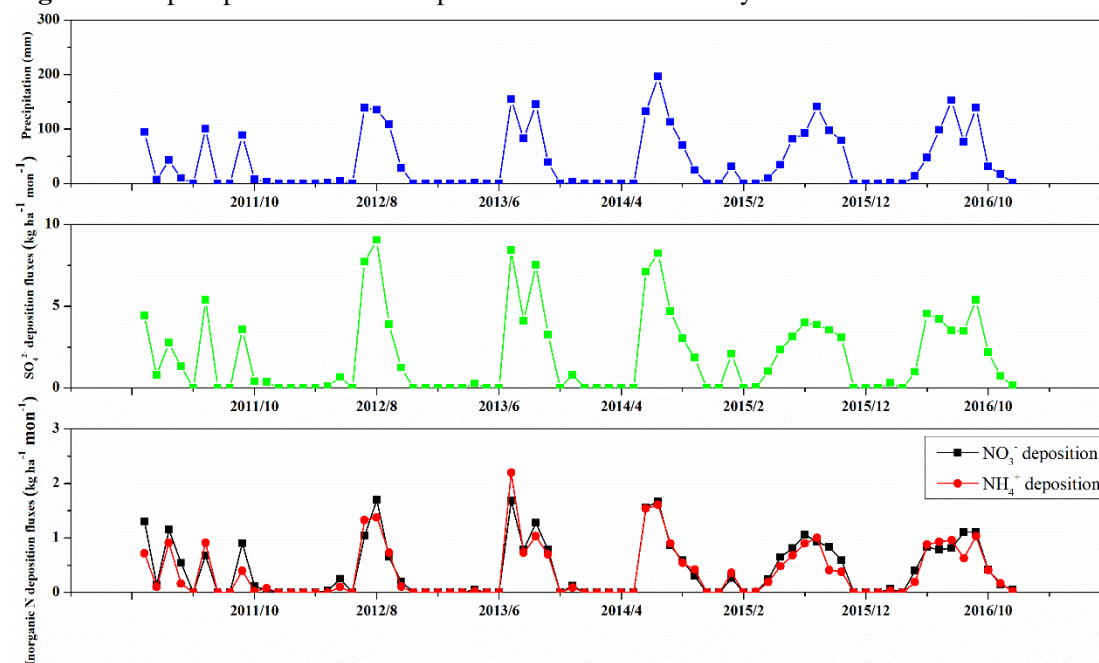

**Fig. S70** The precipitation and wet deposition fluxes of secondary ions in Pingdingshan

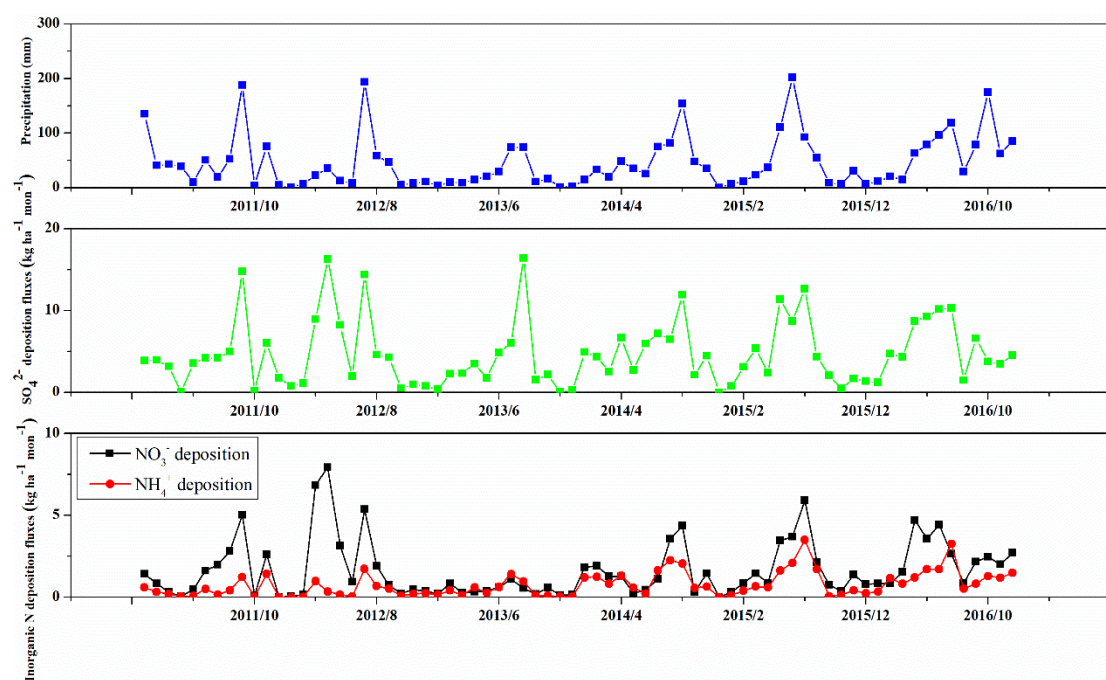



**Fig. S71** The precipitation and wet deposition fluxes of secondary ions in Pingxiang

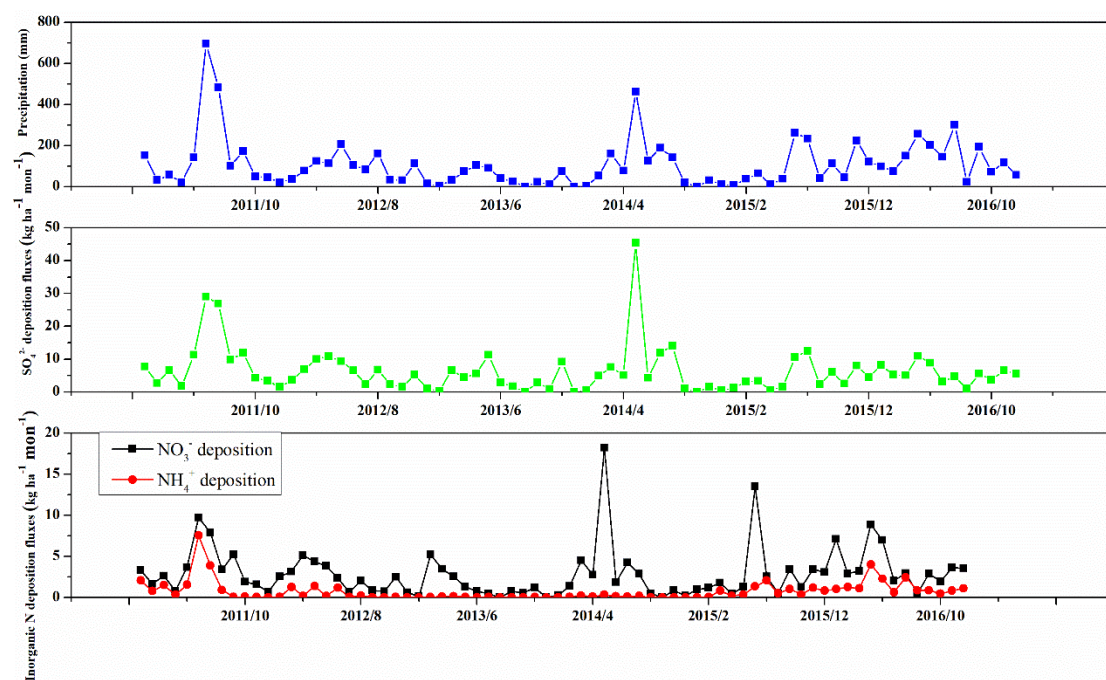

**Fig. S72** The precipitation and wet deposition fluxes of secondary ions in Qitaihe

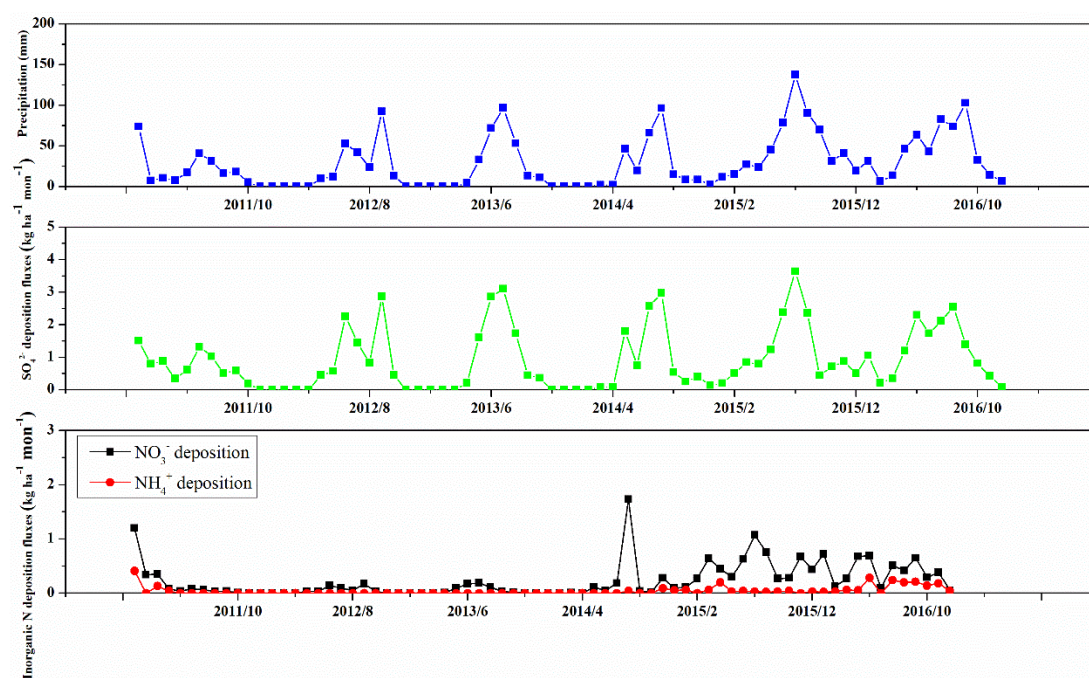

**Fig. S73** The precipitation and wet deposition fluxes of secondary ions in Qiqihaer

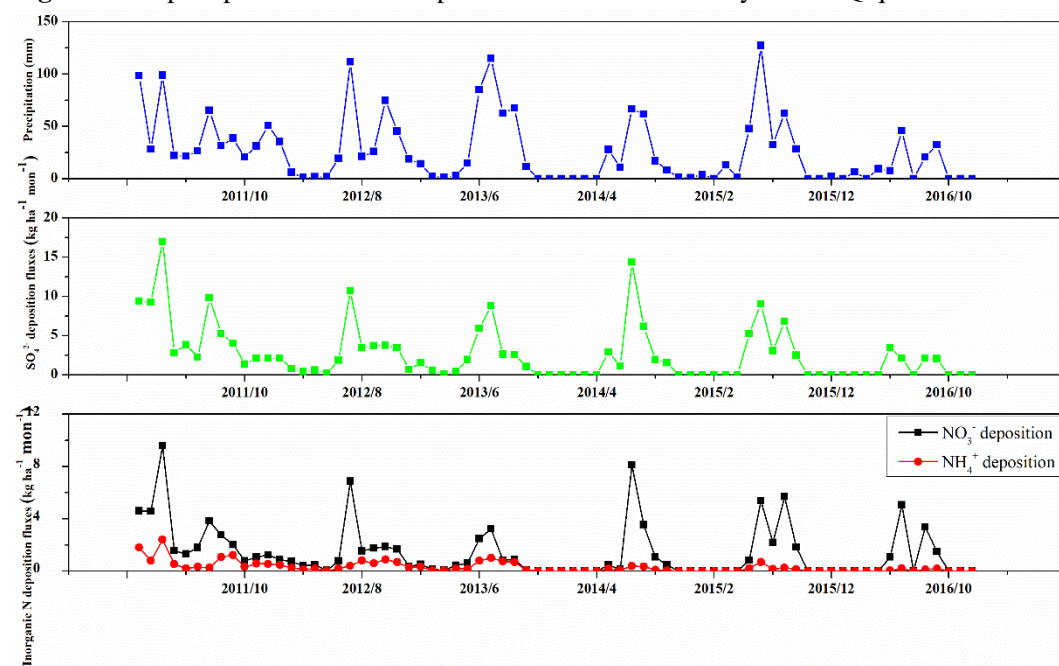

**Fig. S74** The precipitation and wet deposition fluxes of secondary ions in Shanghai

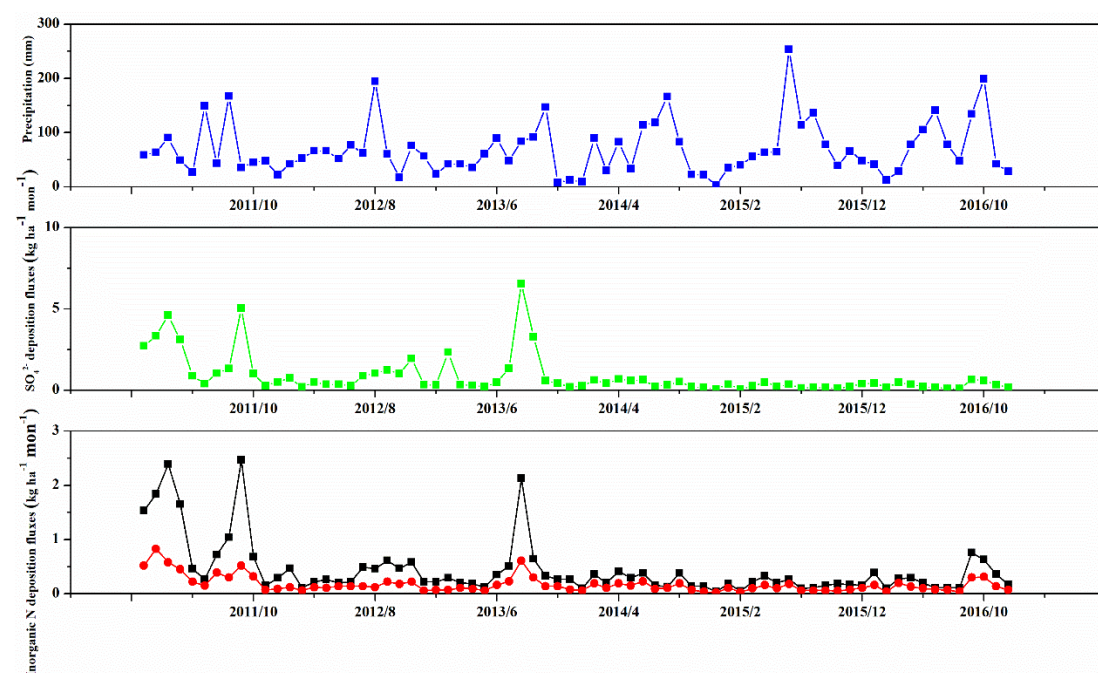

**Fig. S75** The precipitation and wet deposition fluxes of secondary ions in Shizuishan

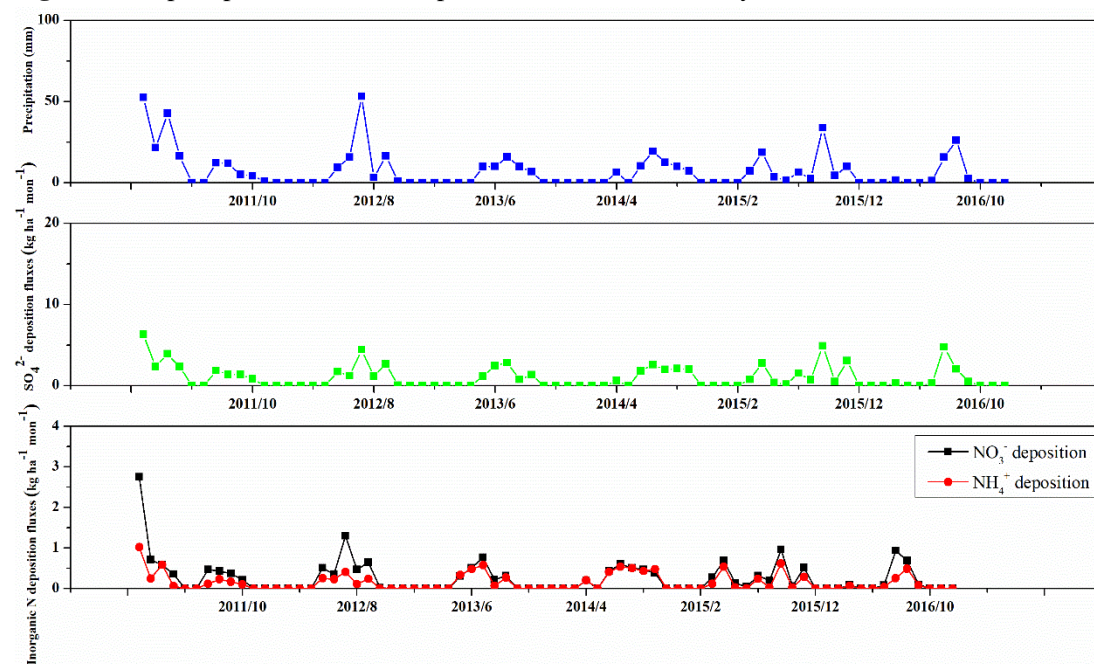

**Fig. S76** The precipitation and wet deposition fluxes of secondary ions in Shuozhou

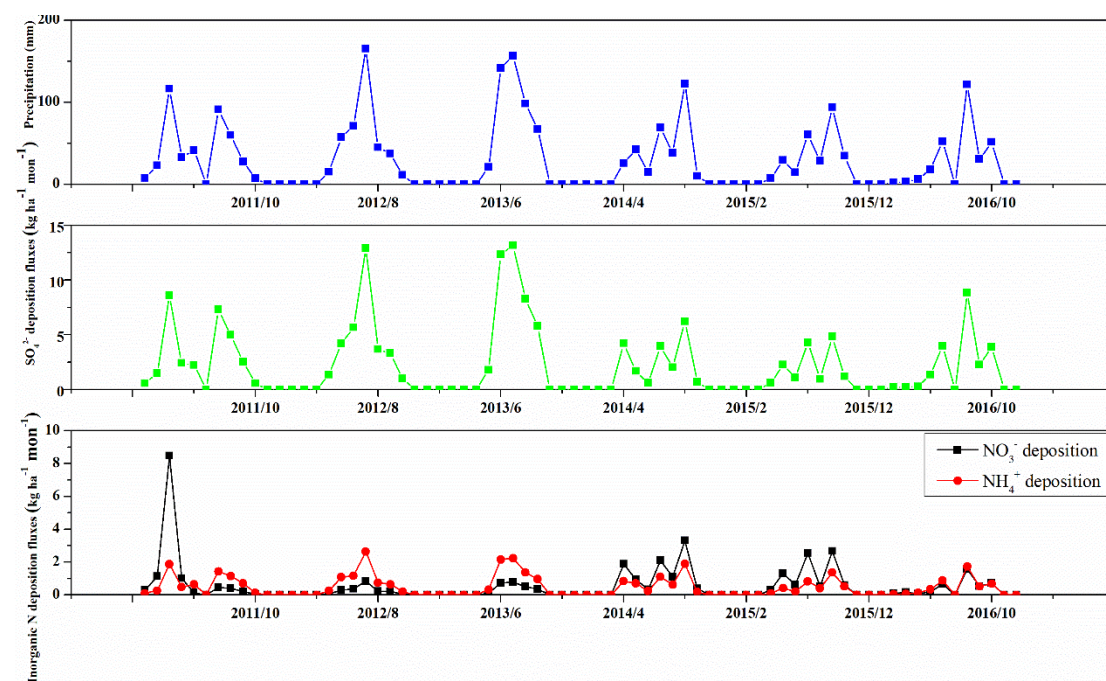



**Fig. S77** The precipitation and wet deposition fluxes of secondary ions in Siping

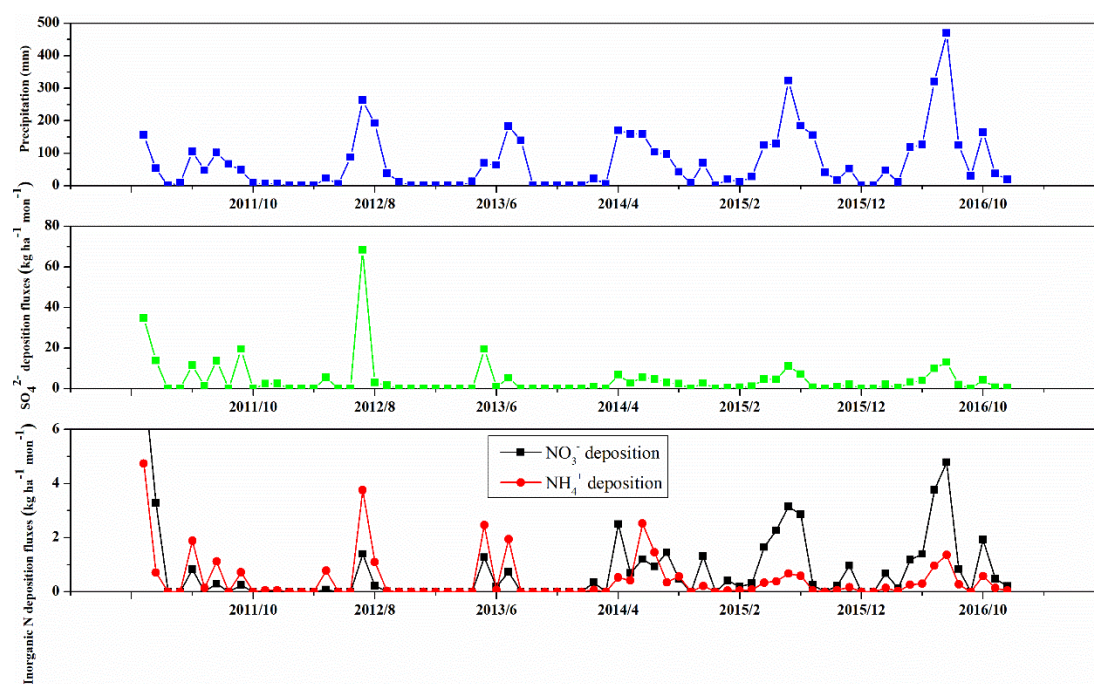

**Fig. S78** The precipitation and wet deposition fluxes of secondary ions in Songyuan

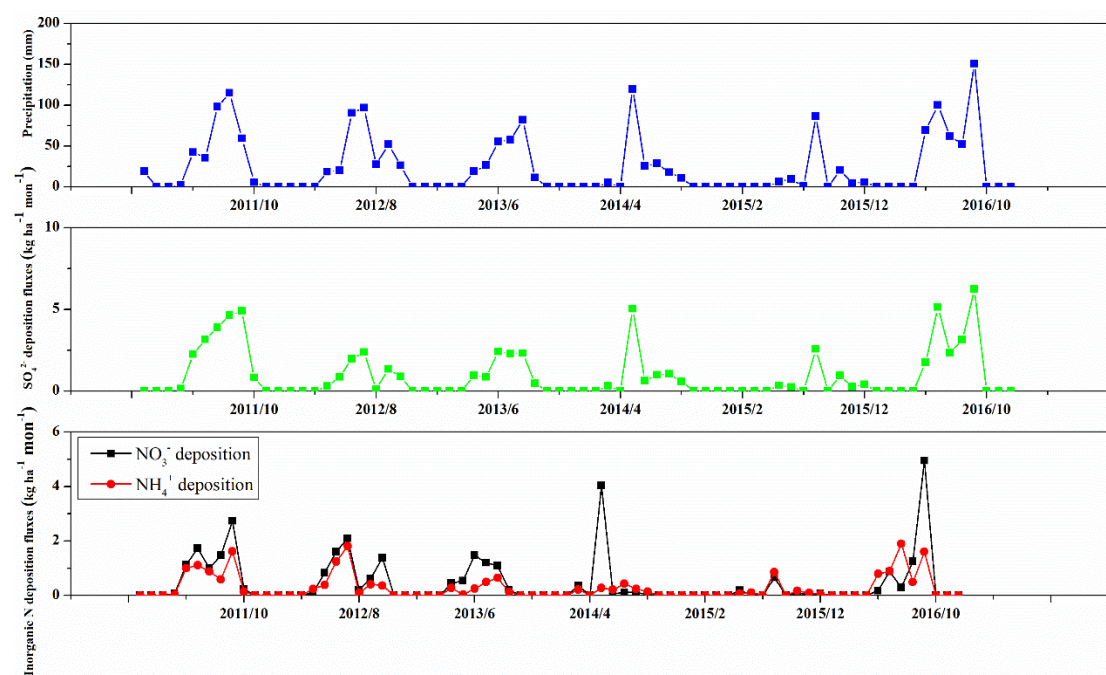

**Fig. S79** The precipitation and wet deposition fluxes of secondary ions in Tacheng

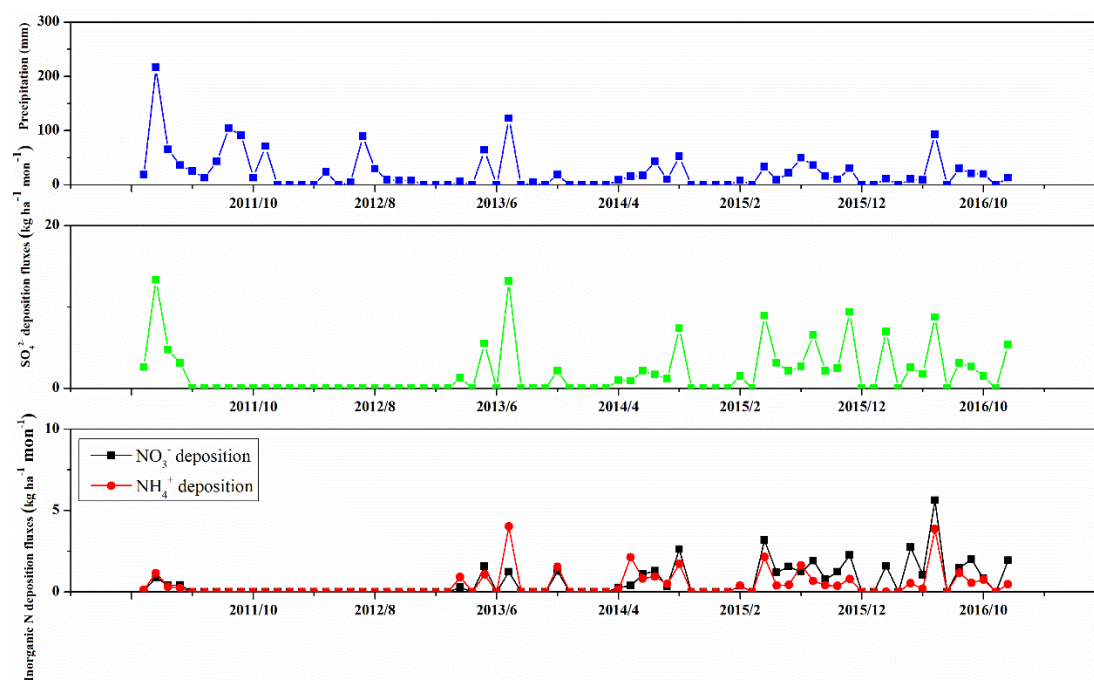

**Fig. S80** The precipitation and wet deposition fluxes of secondary ions in Tangshan

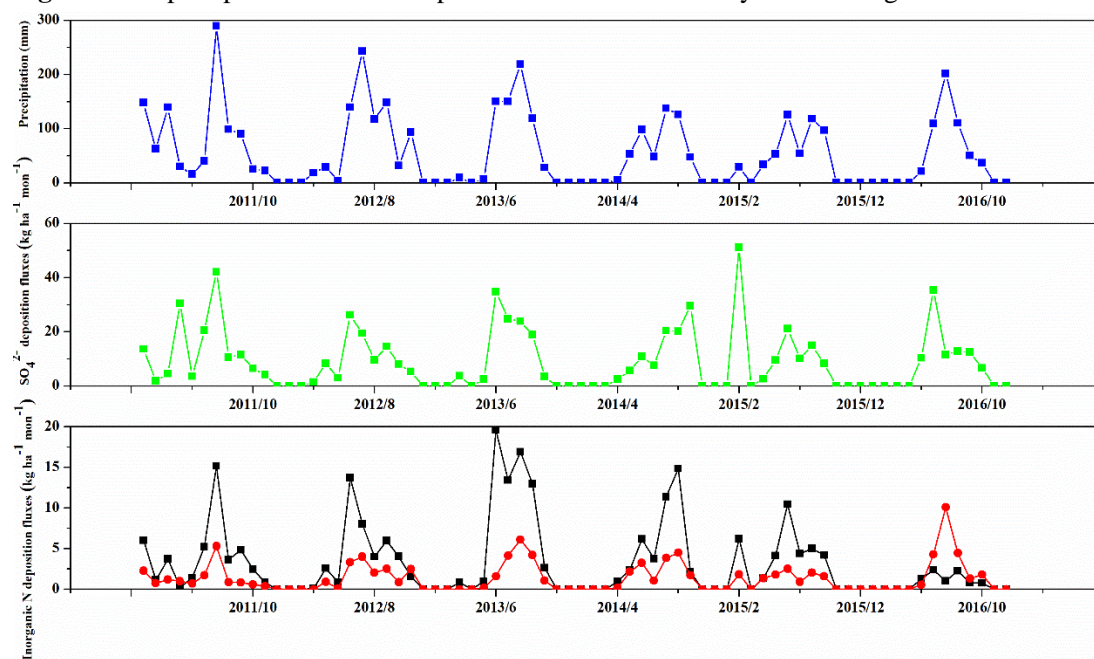

**Fig. S81** The precipitation and wet deposition fluxes of secondary ions in Tonghua

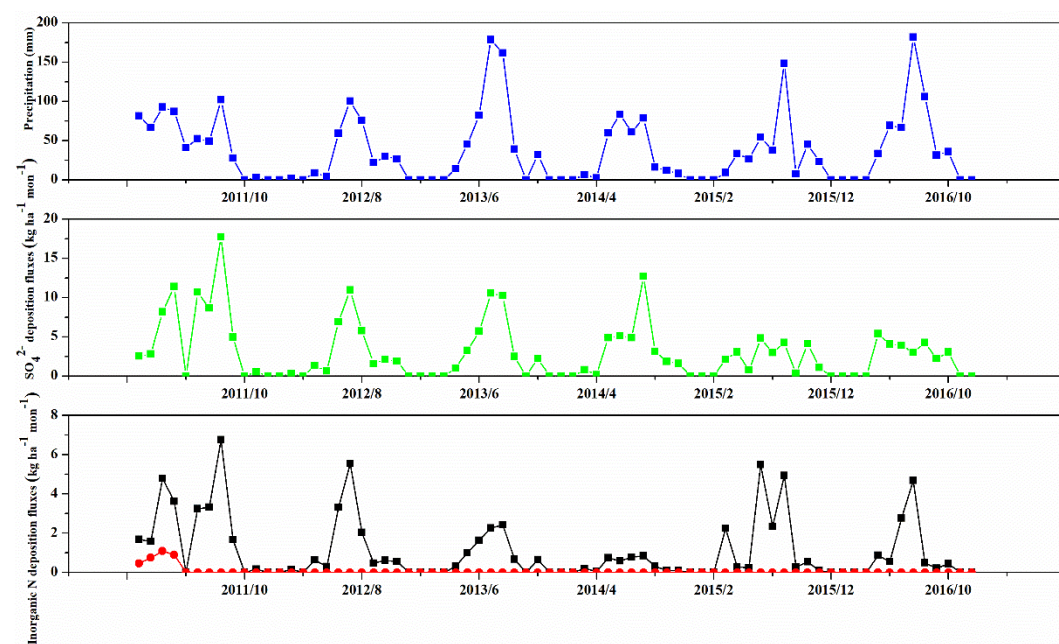

**Fig. S82** The precipitation and wet deposition fluxes of secondary ions in Weifang

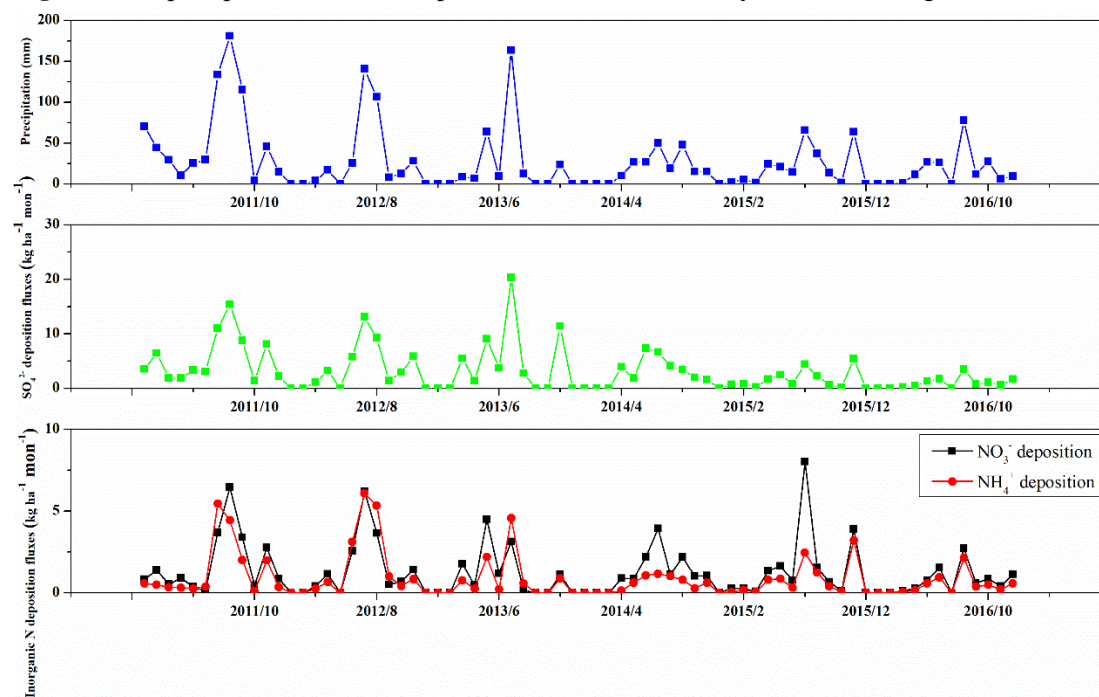



**Fig. S83** The precipitation and wet deposition fluxes of secondary ions in Wuhai

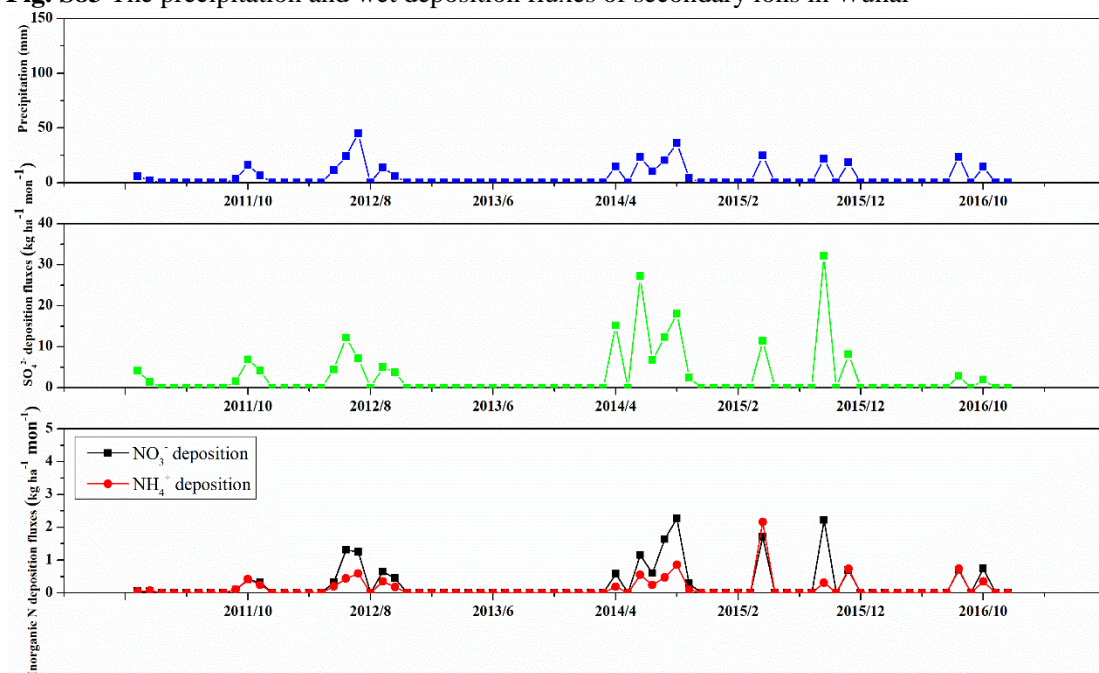

**Fig. S84** The precipitation and wet deposition fluxes of secondary ions in Ulanqab

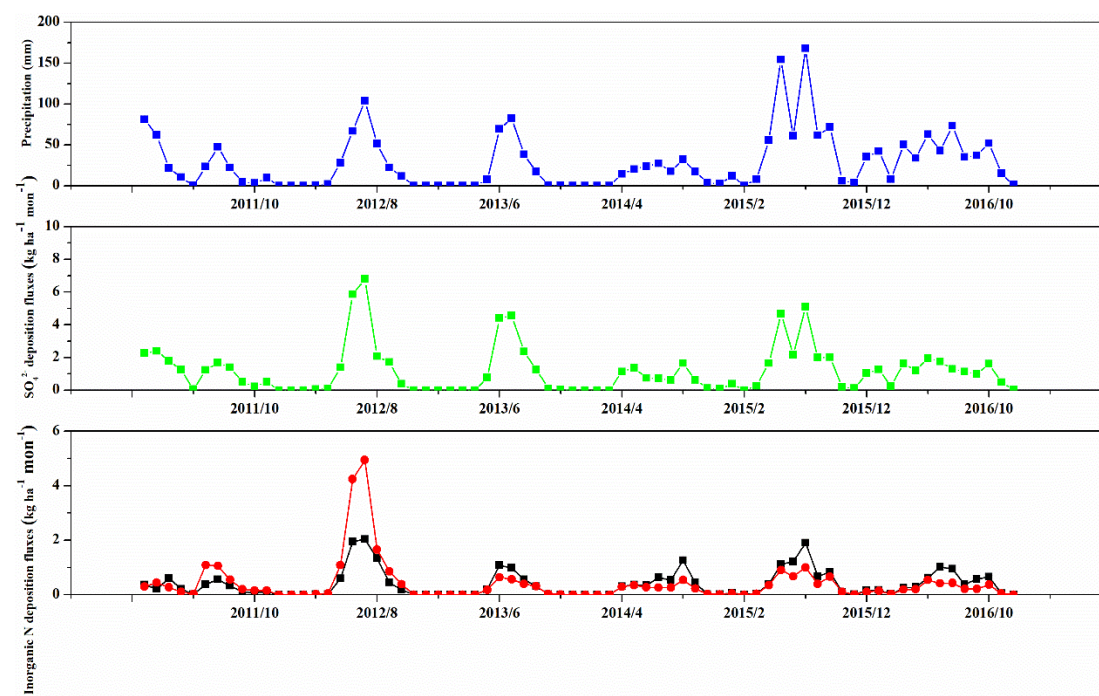

**Fig. S85** The precipitation and wet deposition fluxes of secondary ions in Wuhu

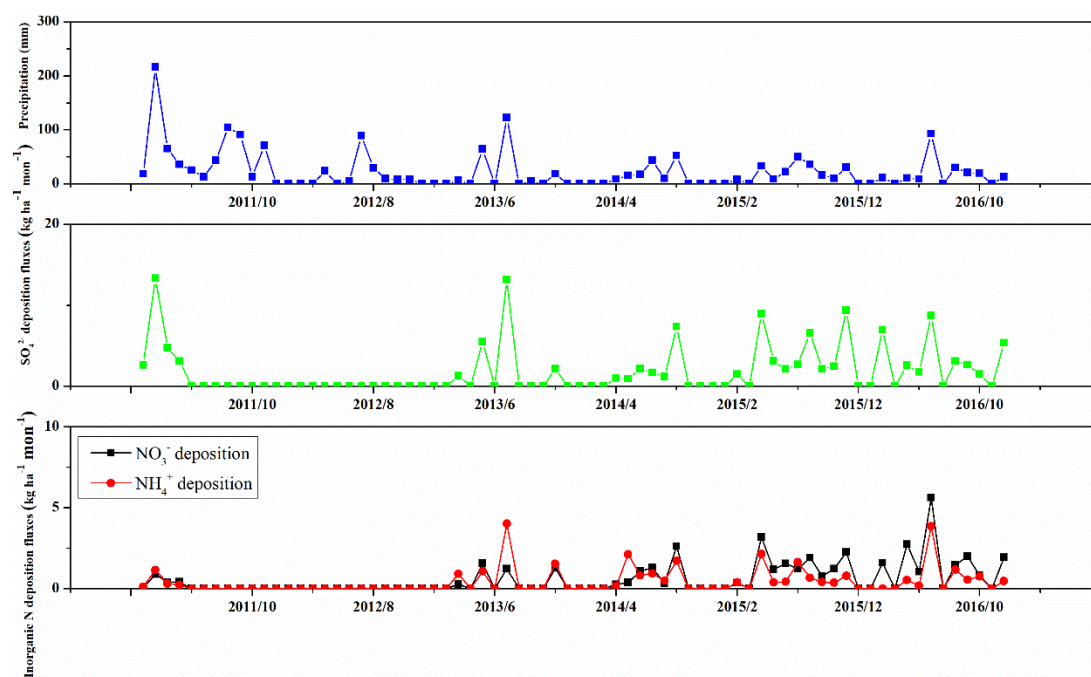

**Fig. S86** The precipitation and wet deposition fluxes of secondary ions in Xining

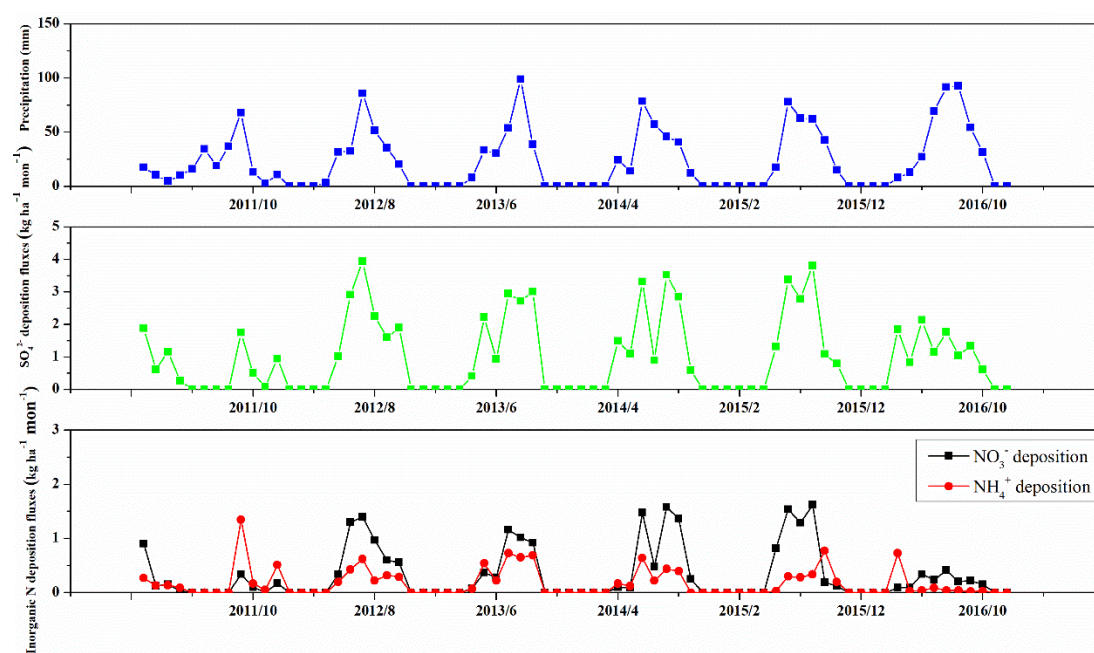

**Fig. S87** The precipitation and wet deposition fluxes of secondary ions in Xishuangbanna

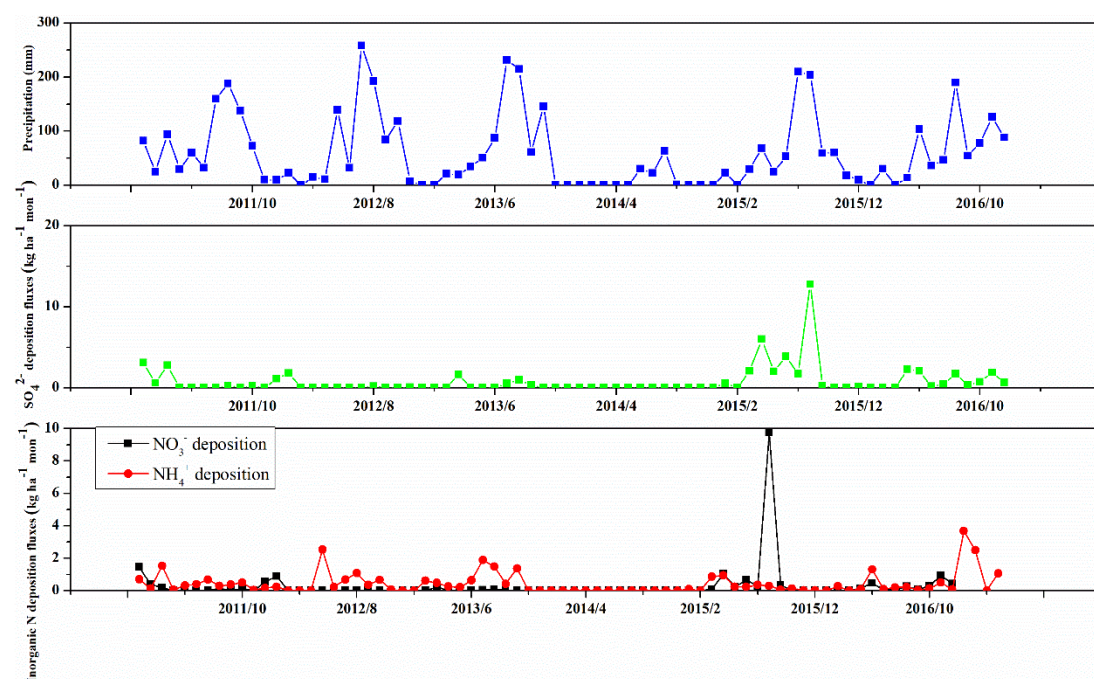

**Fig. S88** The precipitation and wet deposition fluxes of secondary ions in Xinxiang

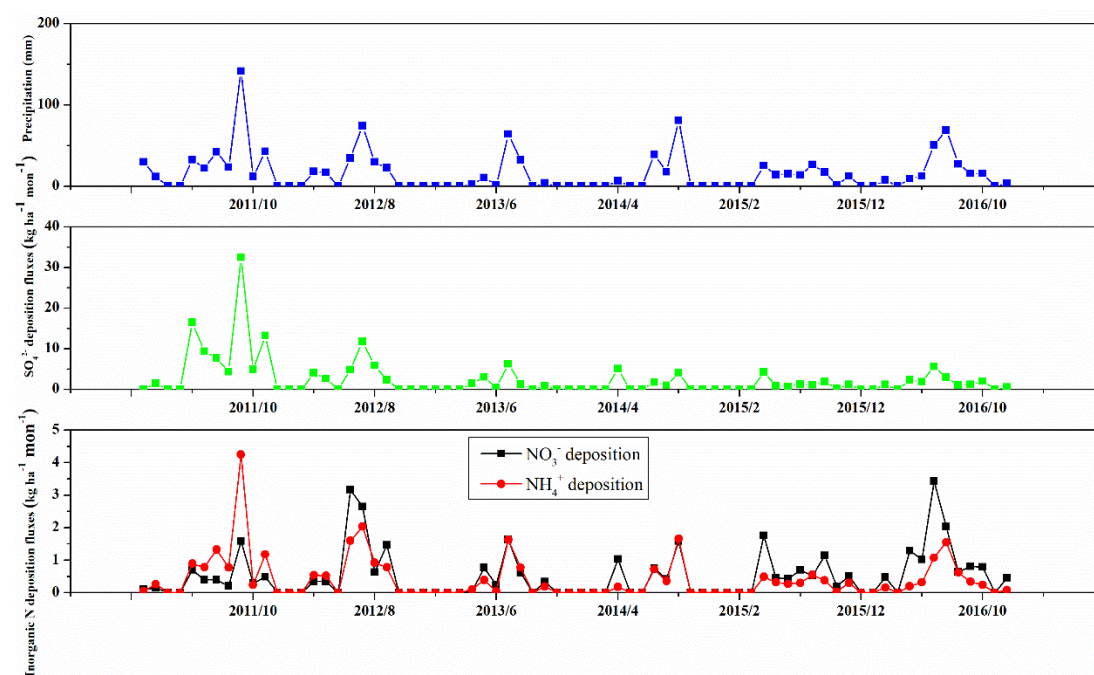



**Fig. S89** The precipitation and wet deposition fluxes of secondary ions in Xinyu

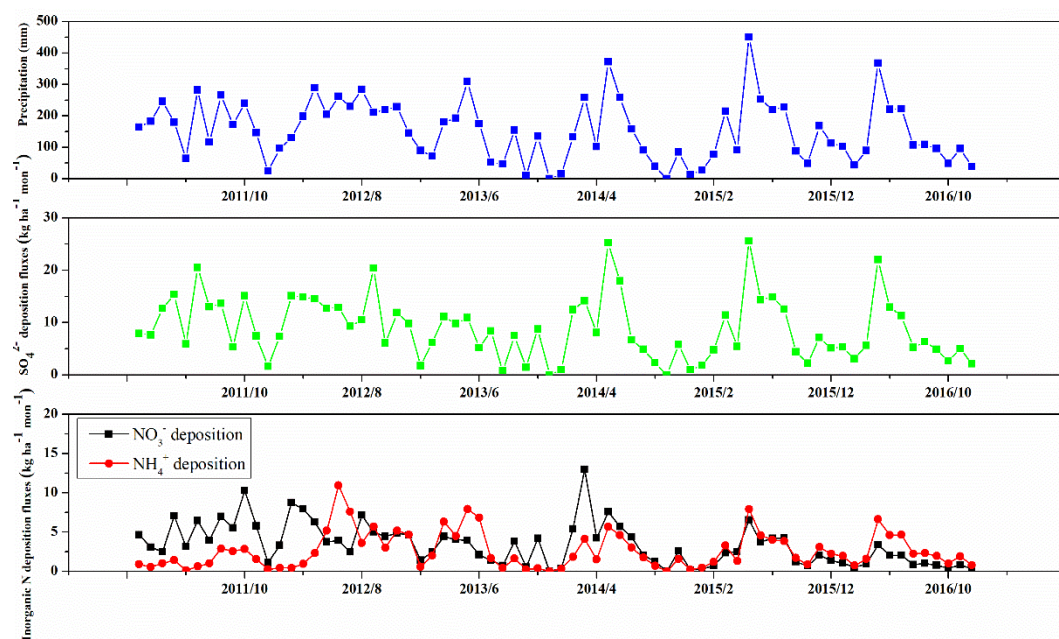

**Fig. S90** The precipitation and wet deposition fluxes of secondary ions in Suqian

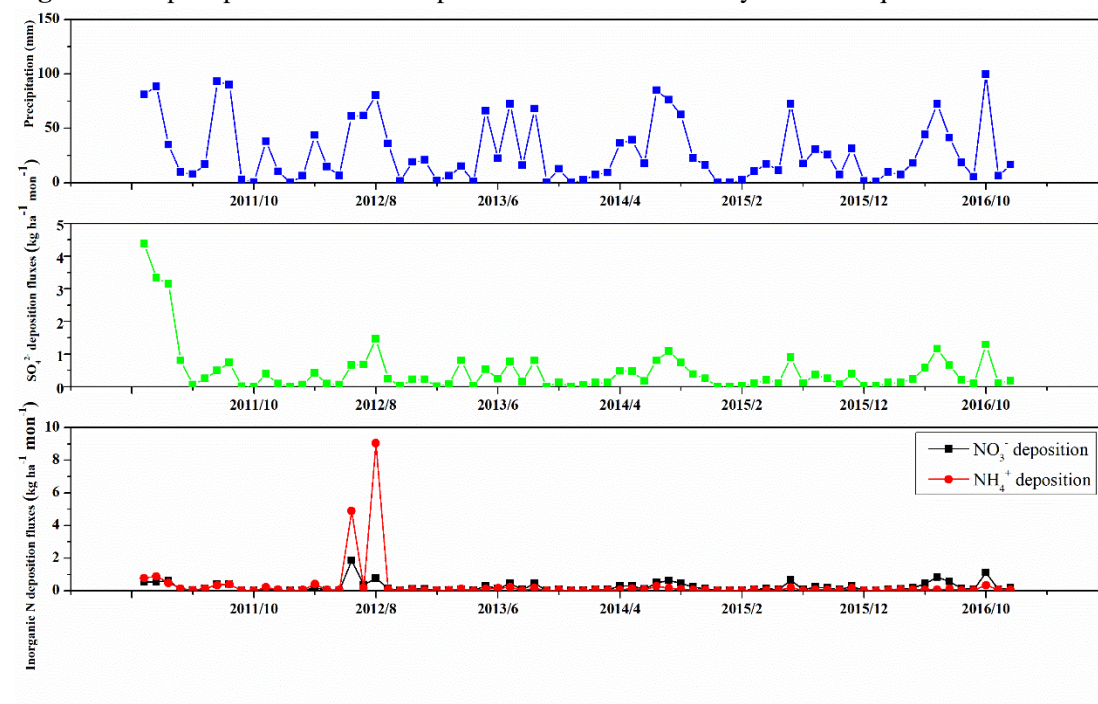

**Fig. S91** The precipitation and wet deposition fluxes of secondary ions in Suzhou

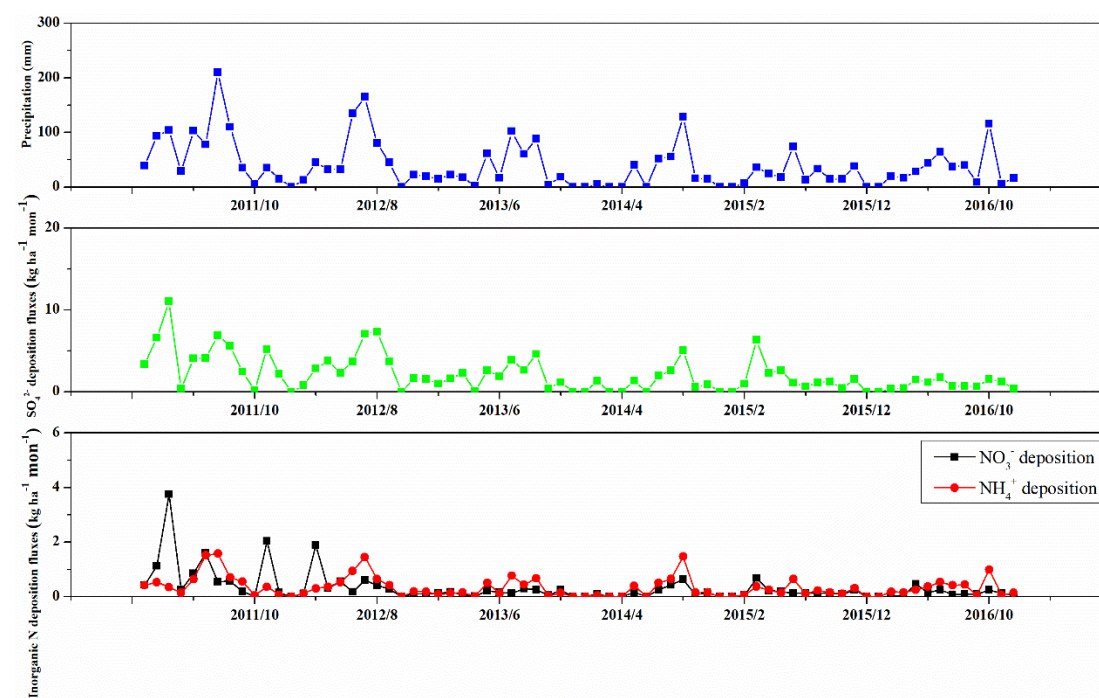

**Fig. S92** The precipitation and wet deposition fluxes of secondary ions in Yanbian

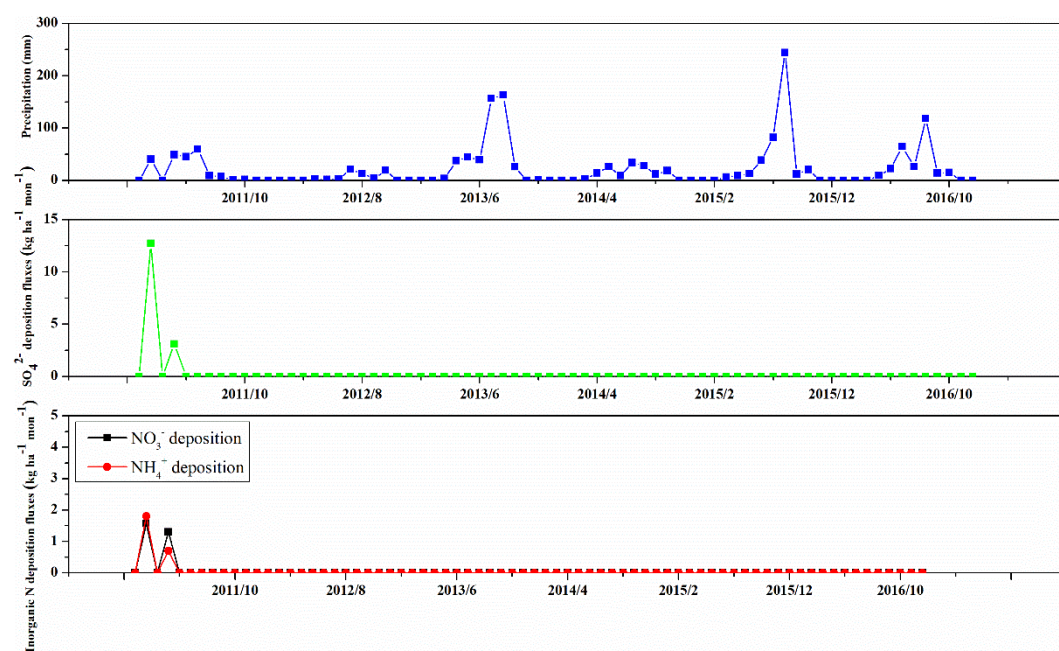

**Fig. S93** The precipitation and wet deposition fluxes of secondary ions in Yingtan

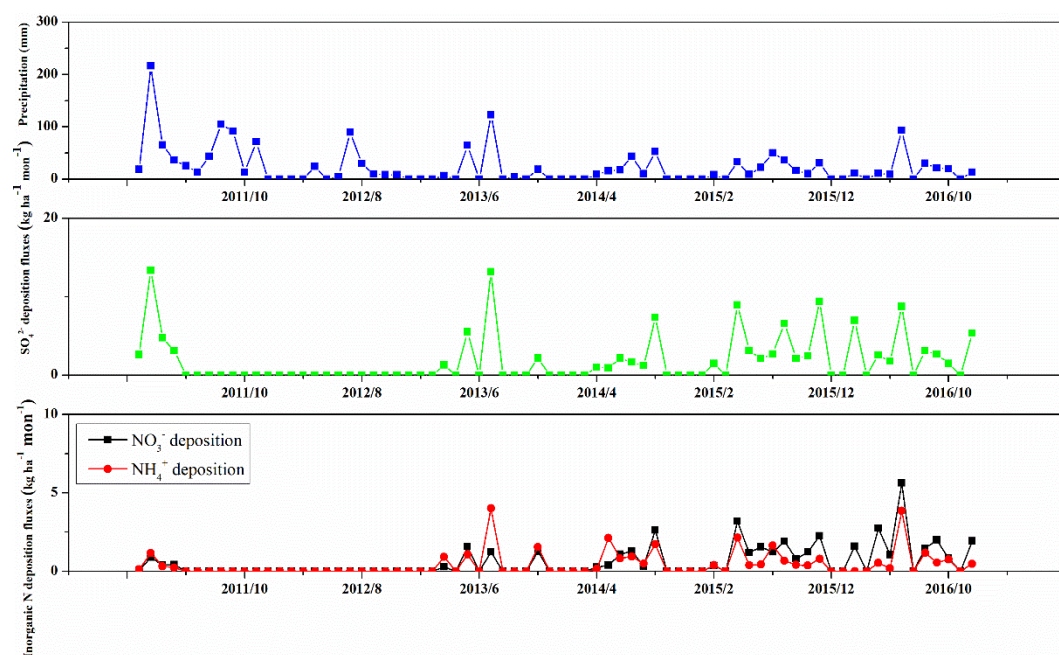

**Fig. S94** The precipitation and wet deposition fluxes of secondary ions in Zhenjiang

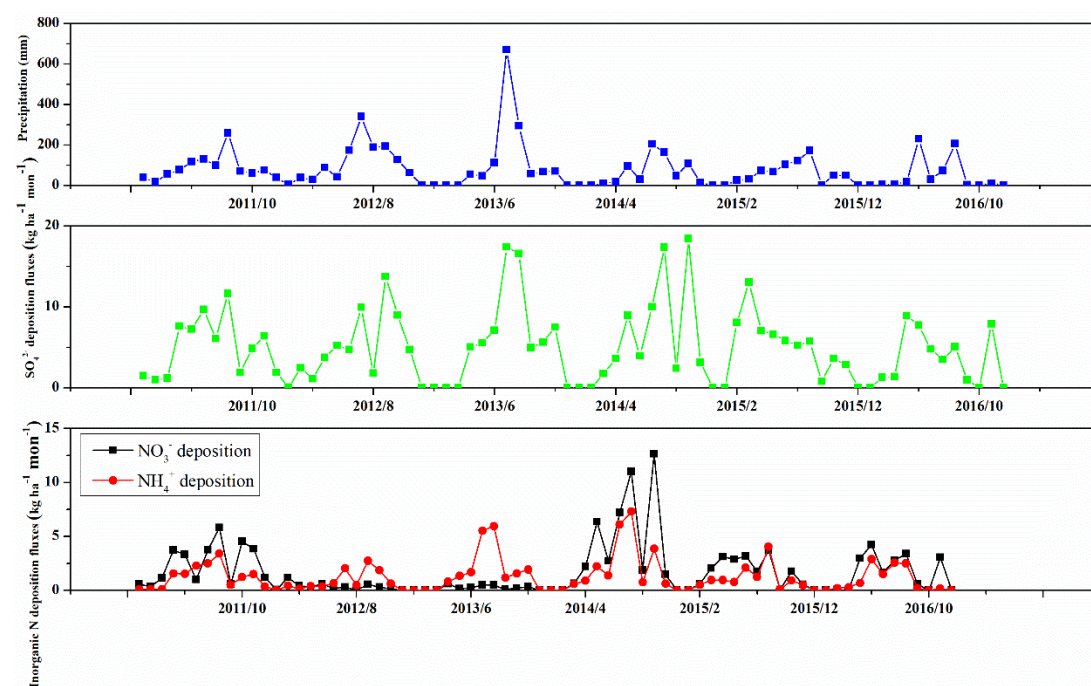



**Fig. S95** The precipitation and wet deposition fluxes of secondary ions in Altay

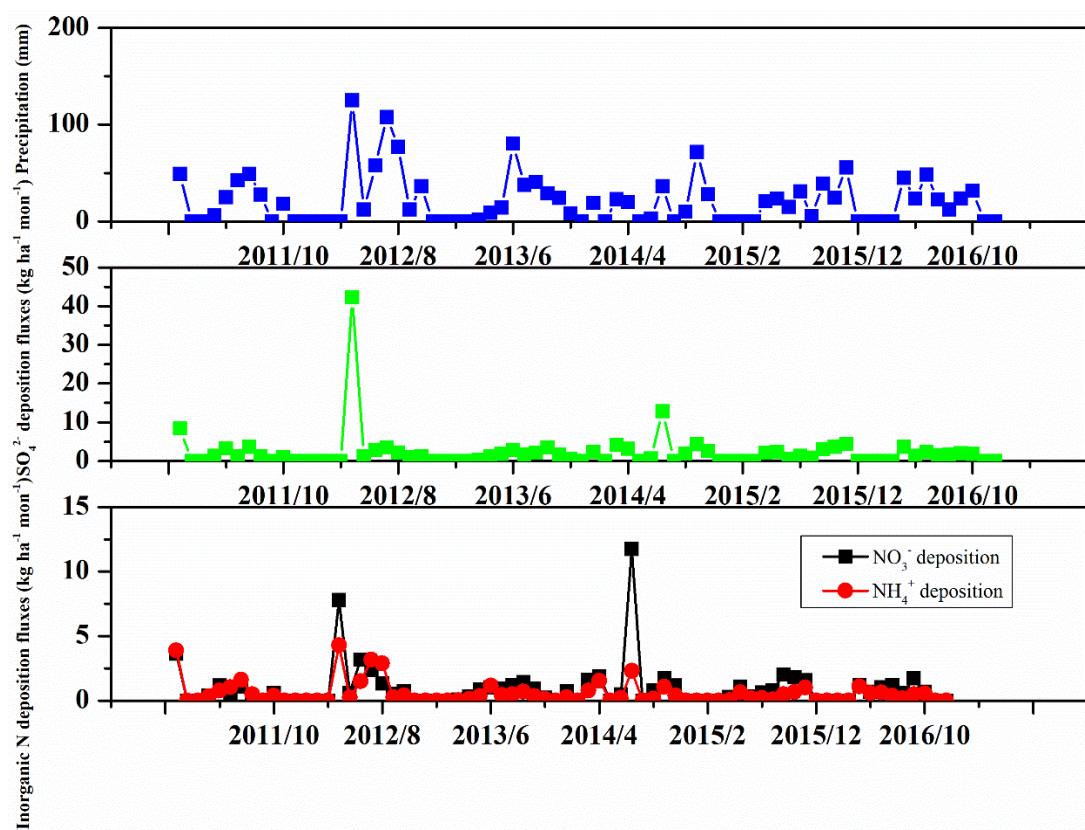

**Fig. S96** The precipitation and wet deposition fluxes of secondary ions in Anyang

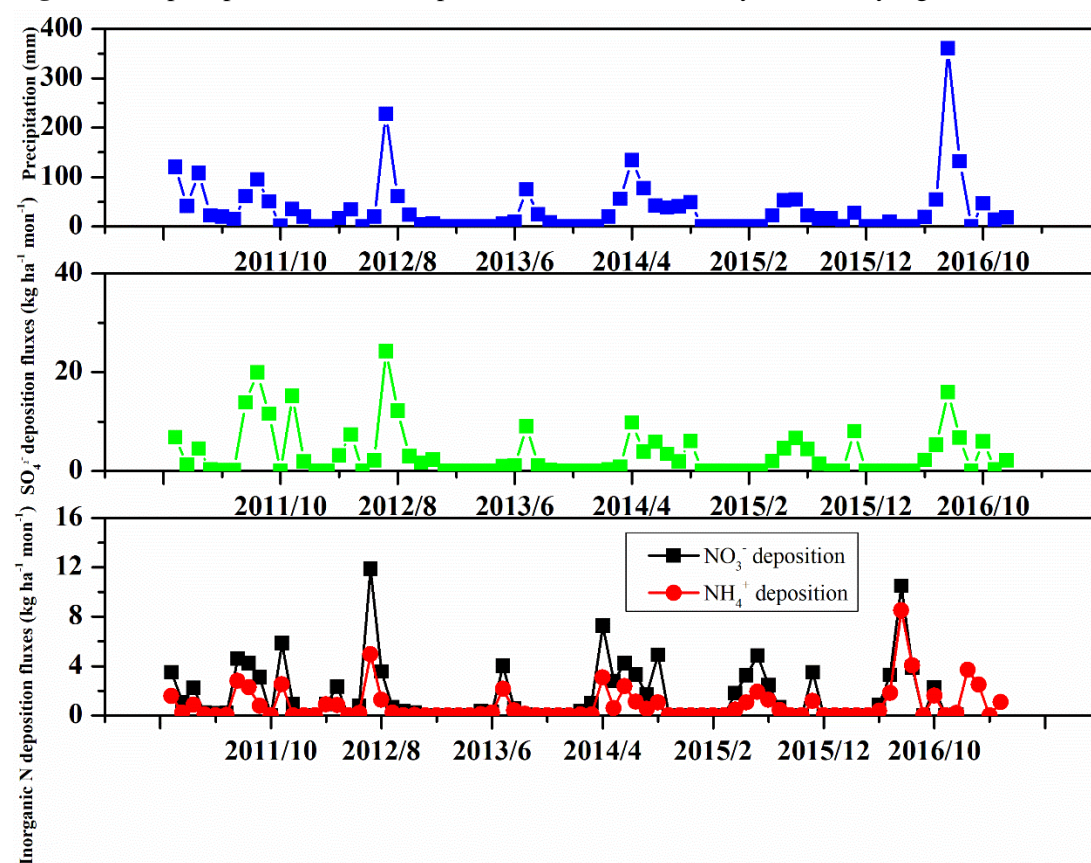

**Fig. S97** The precipitation and wet deposition fluxes of secondary ions in Baishan

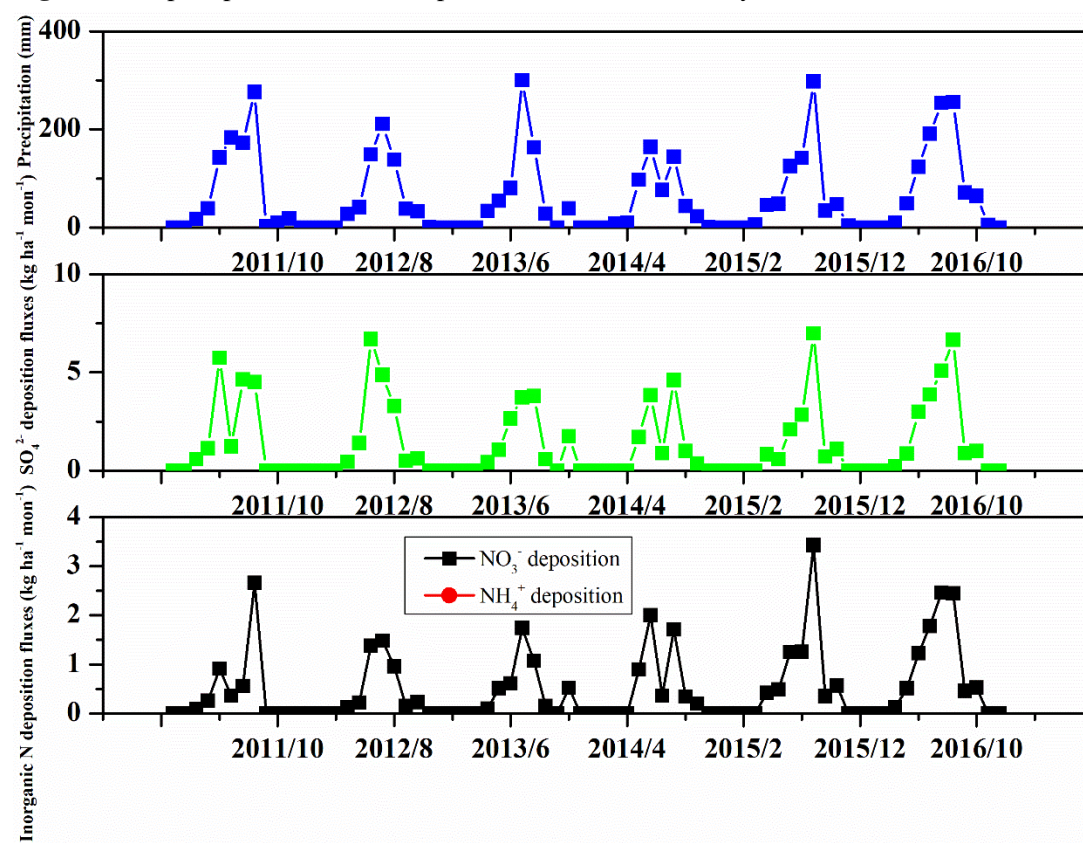

**Fig. S98** The precipitation and wet deposition fluxes of secondary ions in Baoshan

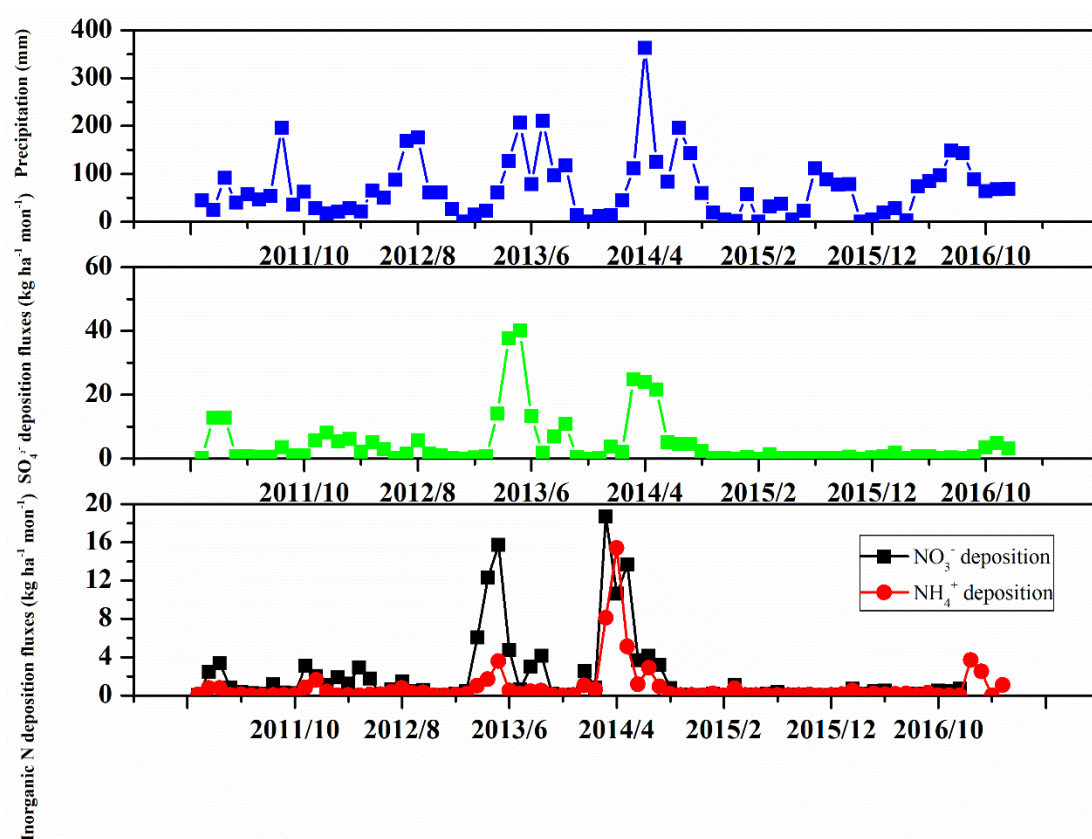



**Fig. S99** The precipitation and wet deposition fluxes of secondary ions in Dali

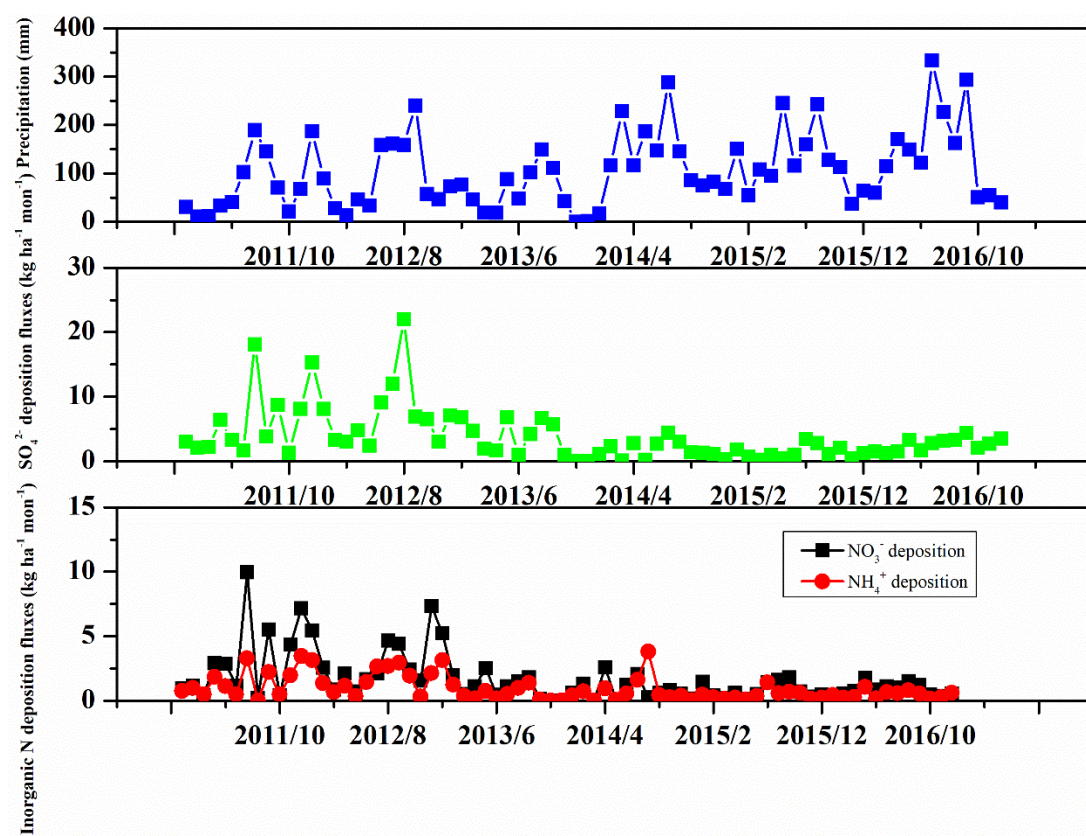

**Fig. S100** The precipitation and wet deposition fluxes of secondary ions in Dezhou

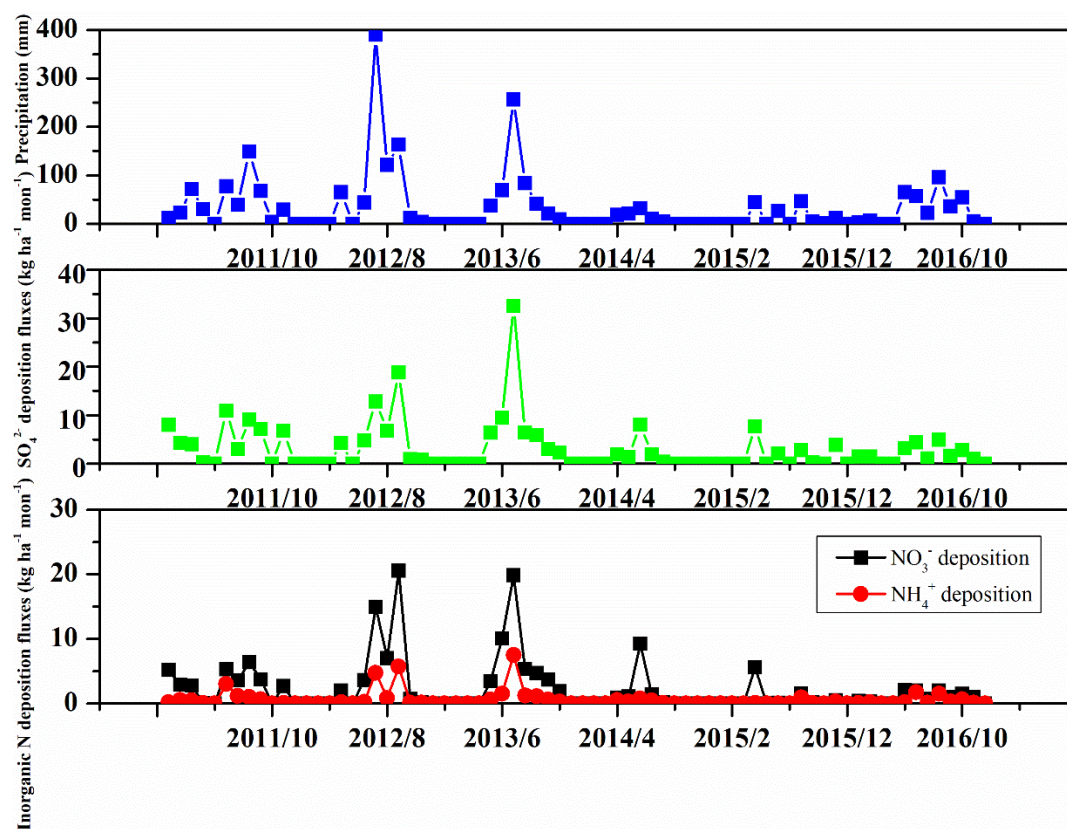



**Fig. S101** The precipitation and wet deposition fluxes of secondary ions in Dongying

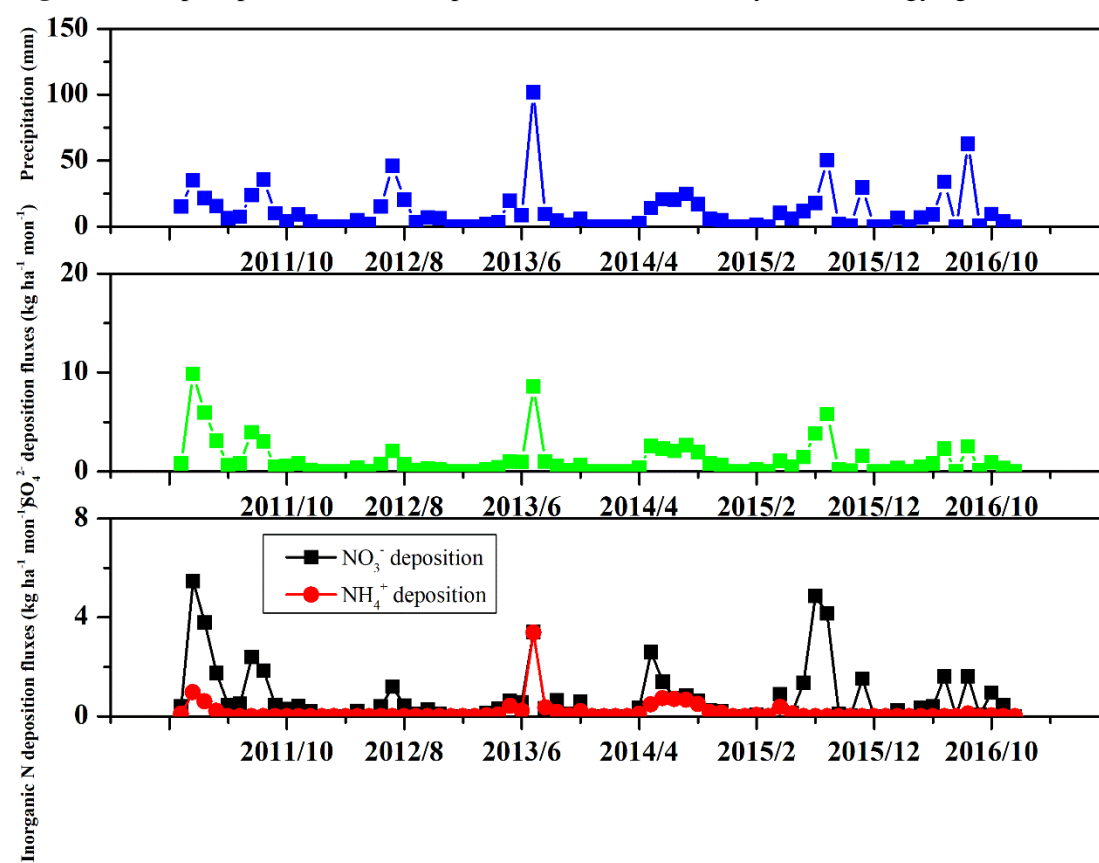

**Fig. S102** The precipitation and wet deposition fluxes of secondary ions in Guiyang

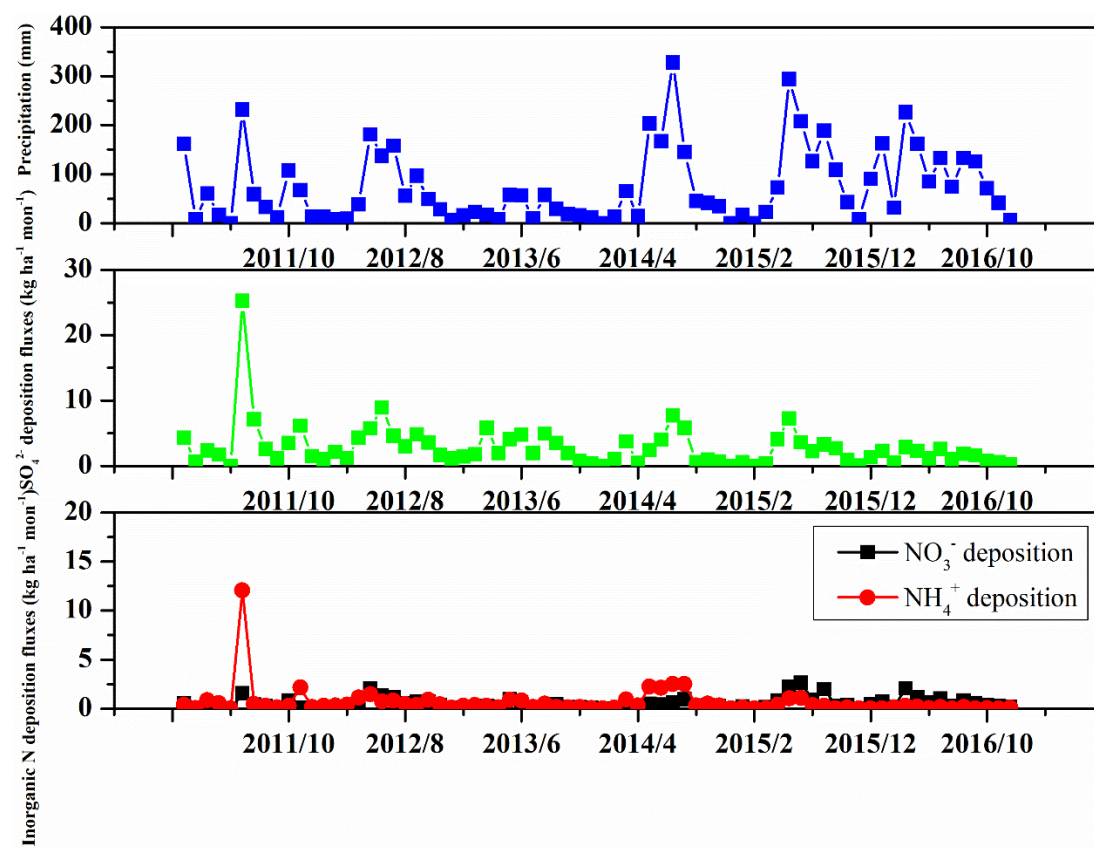

**Fig. S103** The precipitation and wet deposition fluxes of secondary ions in Honghe

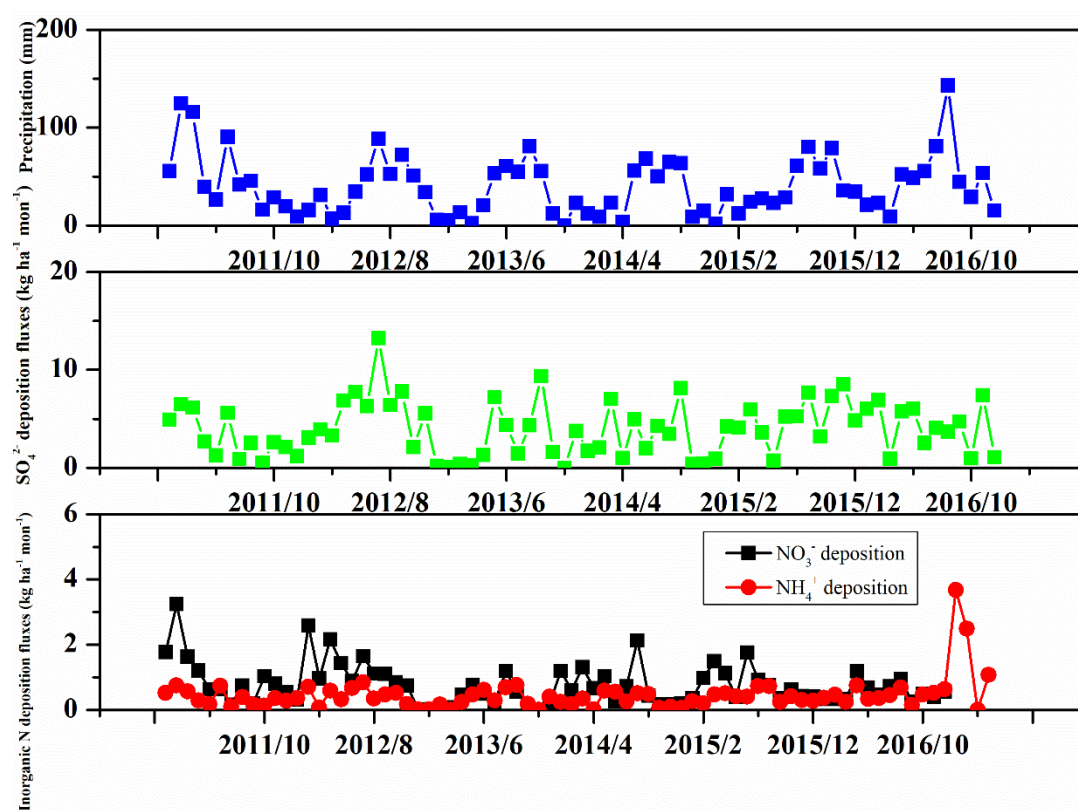

**Fig. S104** The precipitation and wet deposition fluxes of secondary ions in Jieyang

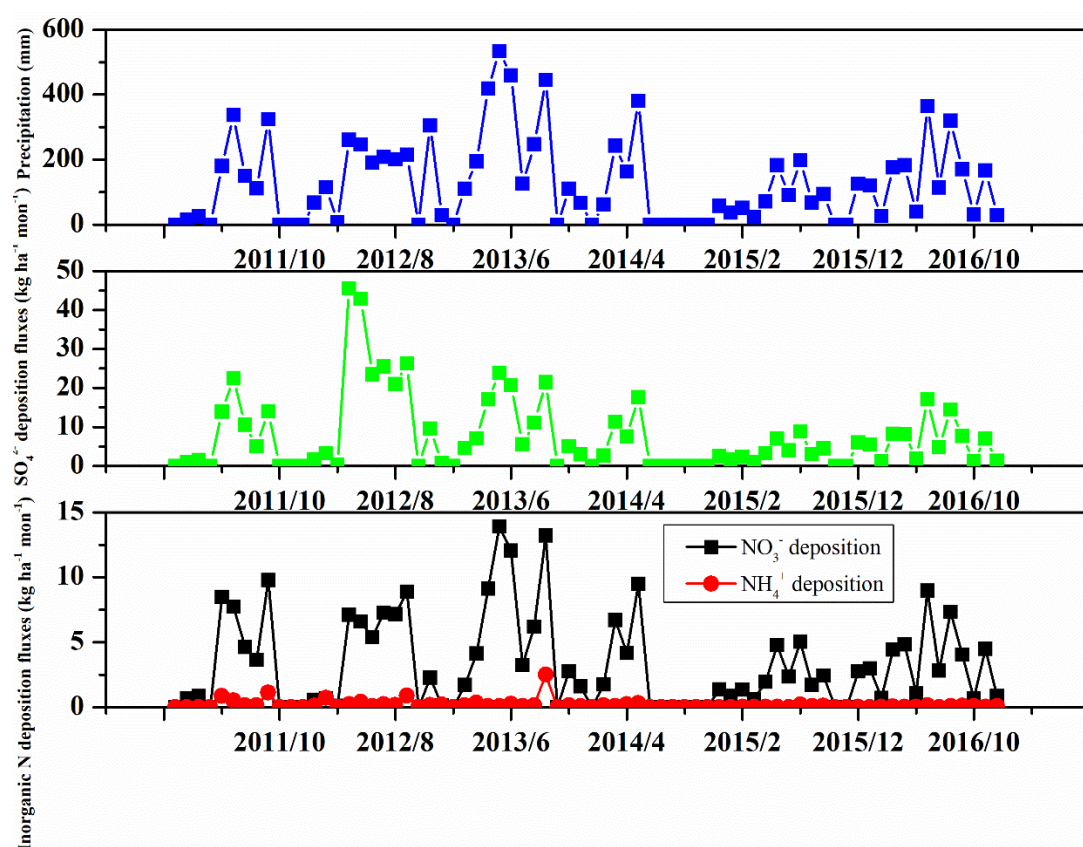

**Fig. S105** The precipitation and wet deposition fluxes of secondary ions in Jincheng

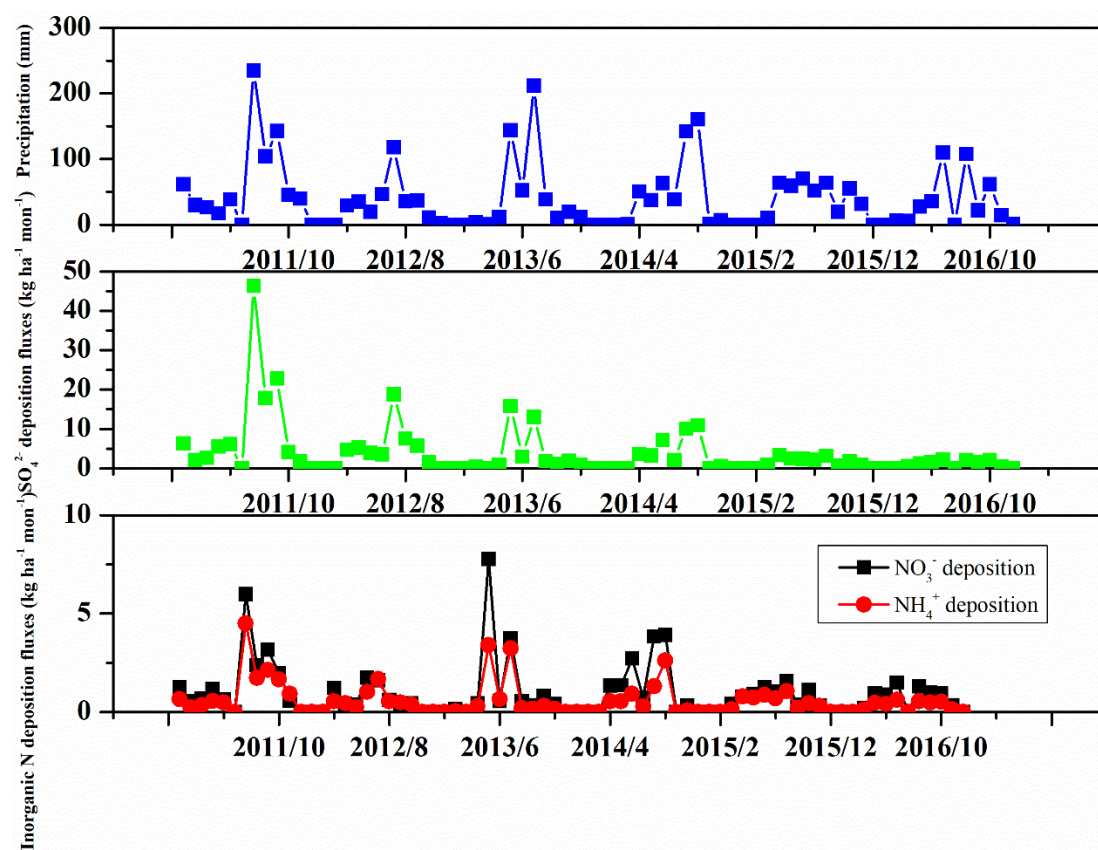

**Fig. S106** The precipitation and wet deposition fluxes of secondary ions in Liupanshui

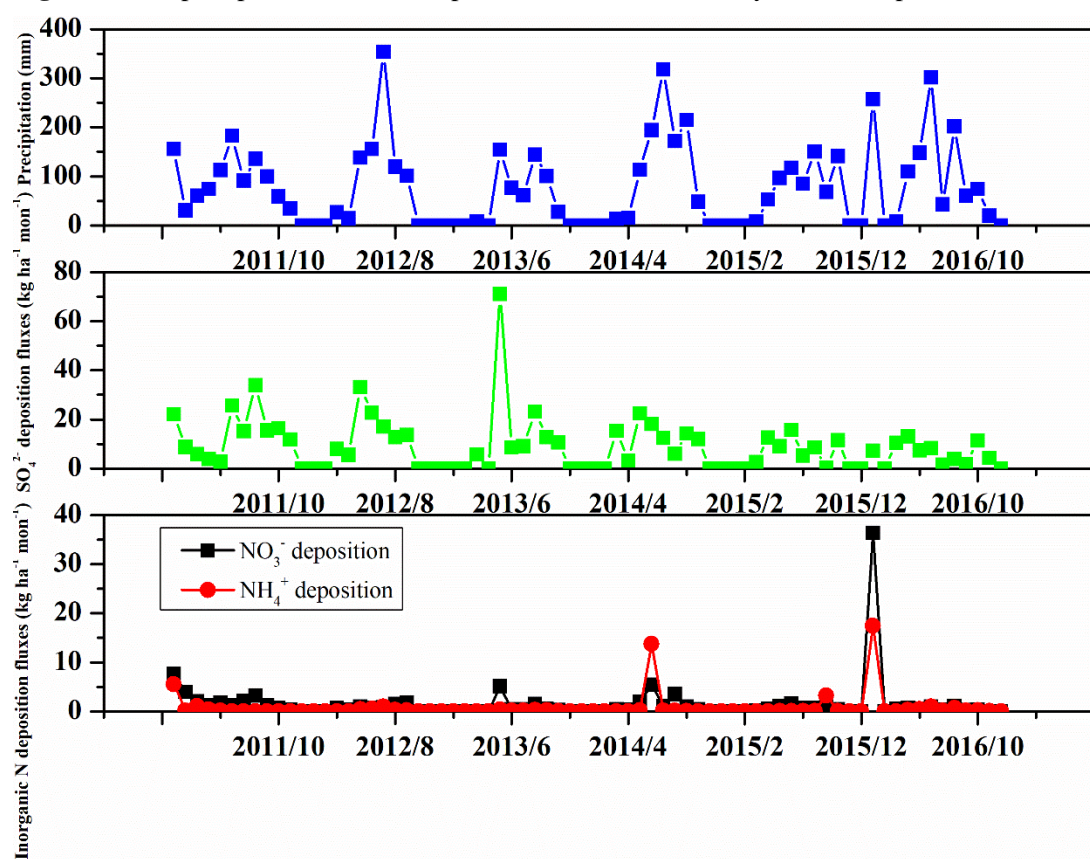



**Fig. S107** The precipitation and wet deposition fluxes of secondary ions in Luoyang

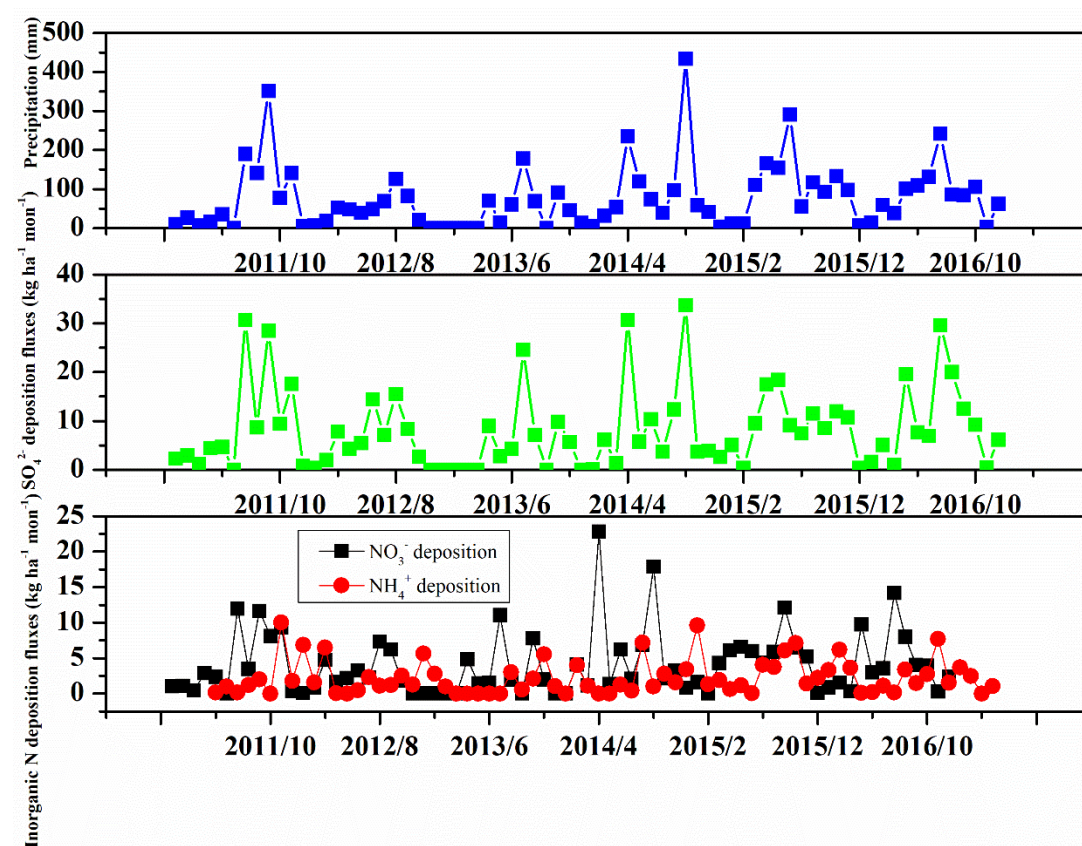

**Fig. S108** The precipitation and wet deposition fluxes of secondary ions in Maanshan

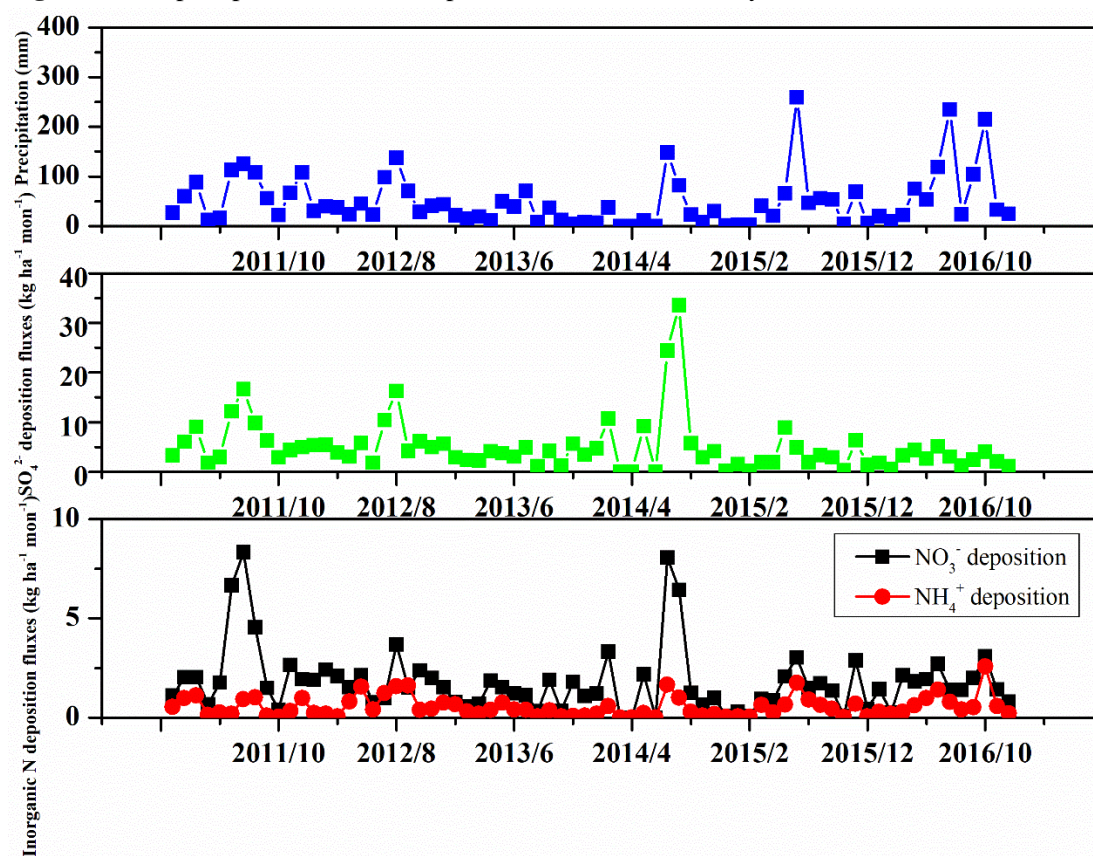

**Fig. S109** The precipitation and wet deposition fluxes of secondary ions in Maoming

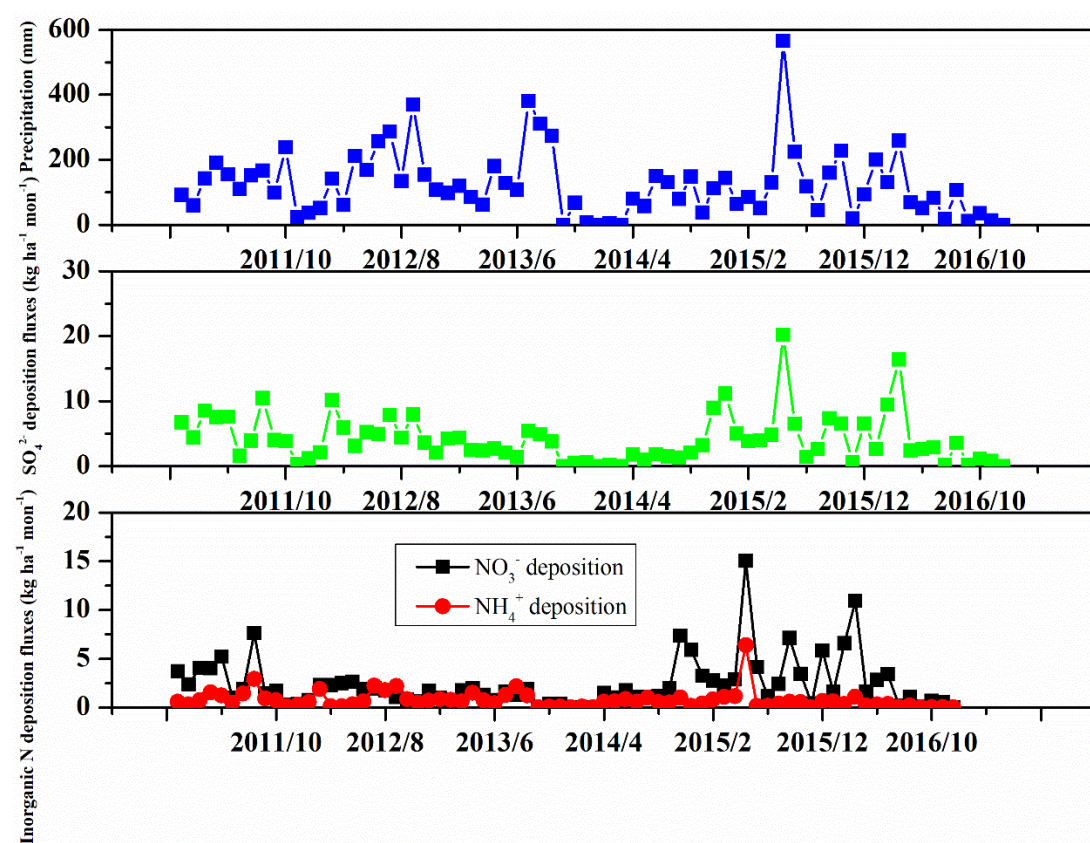

**Fig. S110** The precipitation and wet deposition fluxes of secondary ions in Mianyang

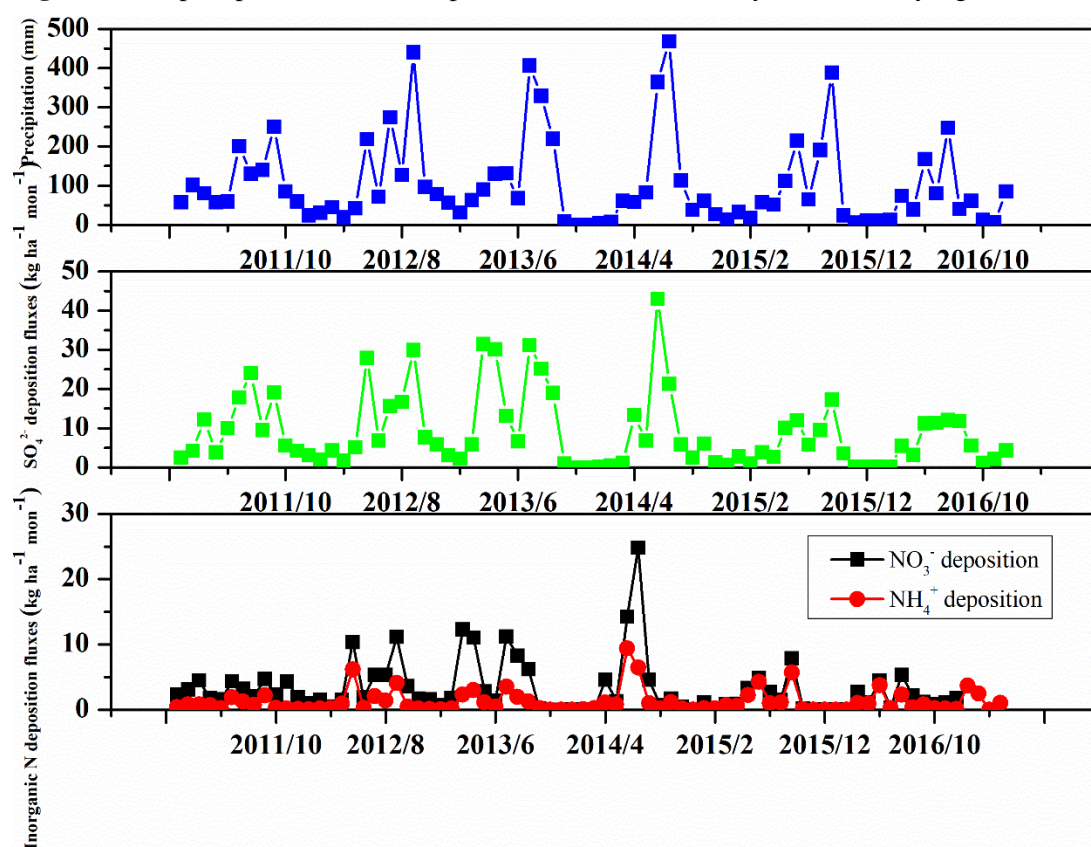

**Fig. S111** The precipitation and wet deposition fluxes of secondary ions in Sanmenxia

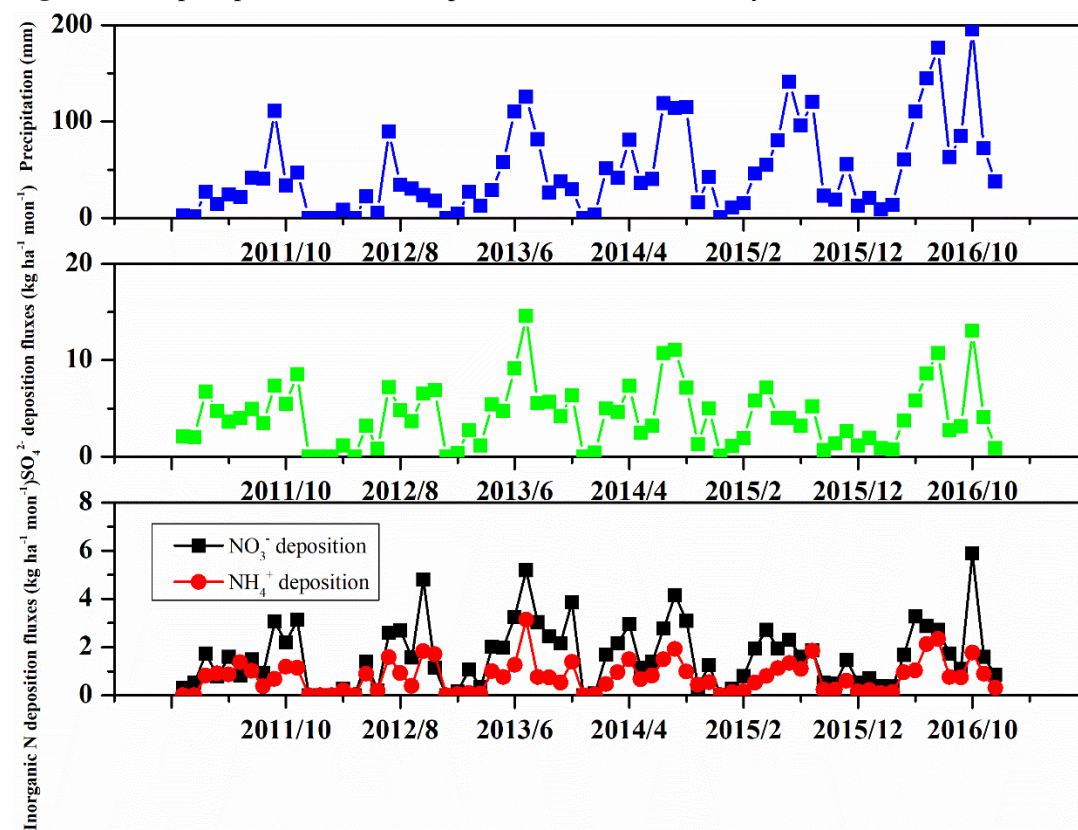



**Fig. S112** The precipitation and wet deposition fluxes of secondary ions in Shijiazhuang

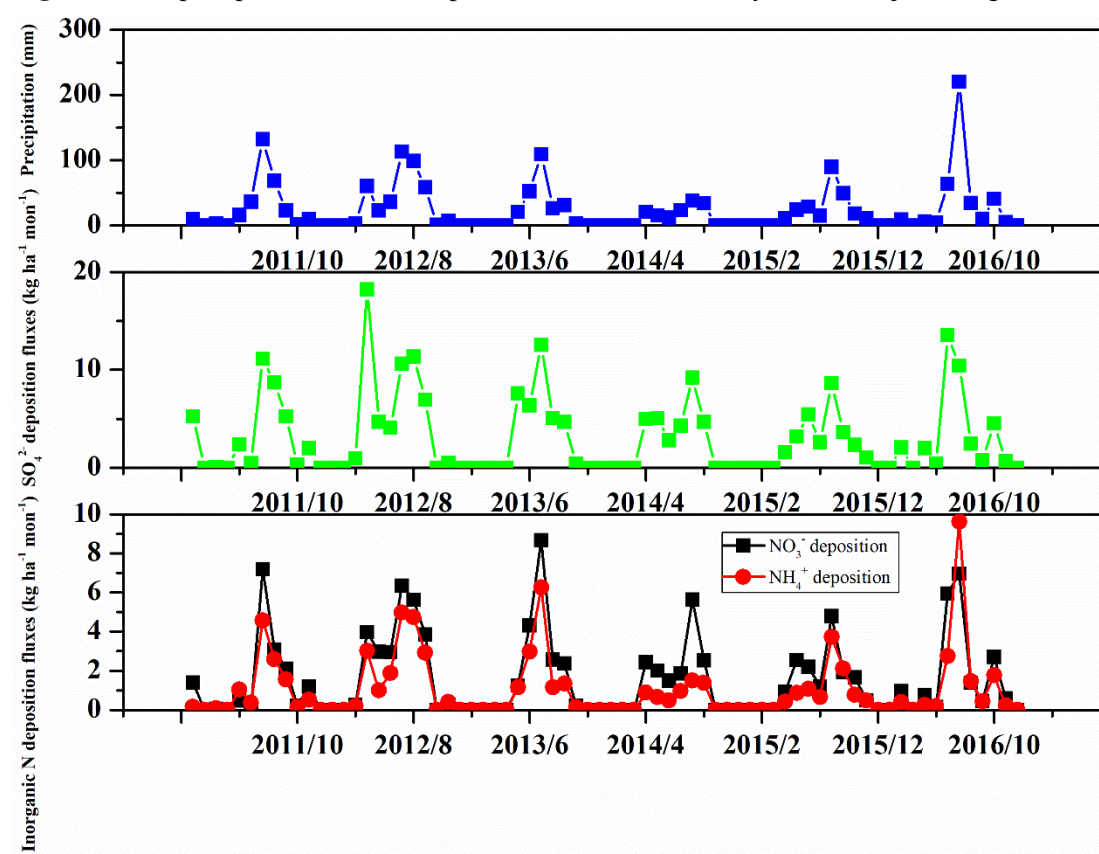



**Fig. S113** The precipitation and wet deposition fluxes of secondary ions in Suzhou

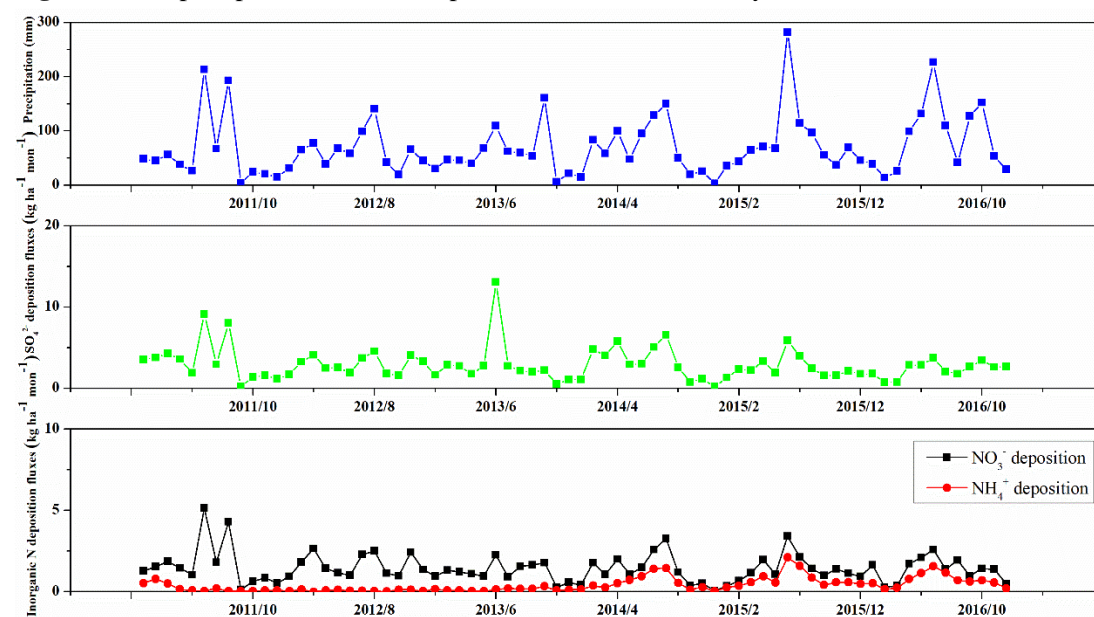

**Fig. S114** The precipitation and wet deposition fluxes of secondary ions in Tianjin

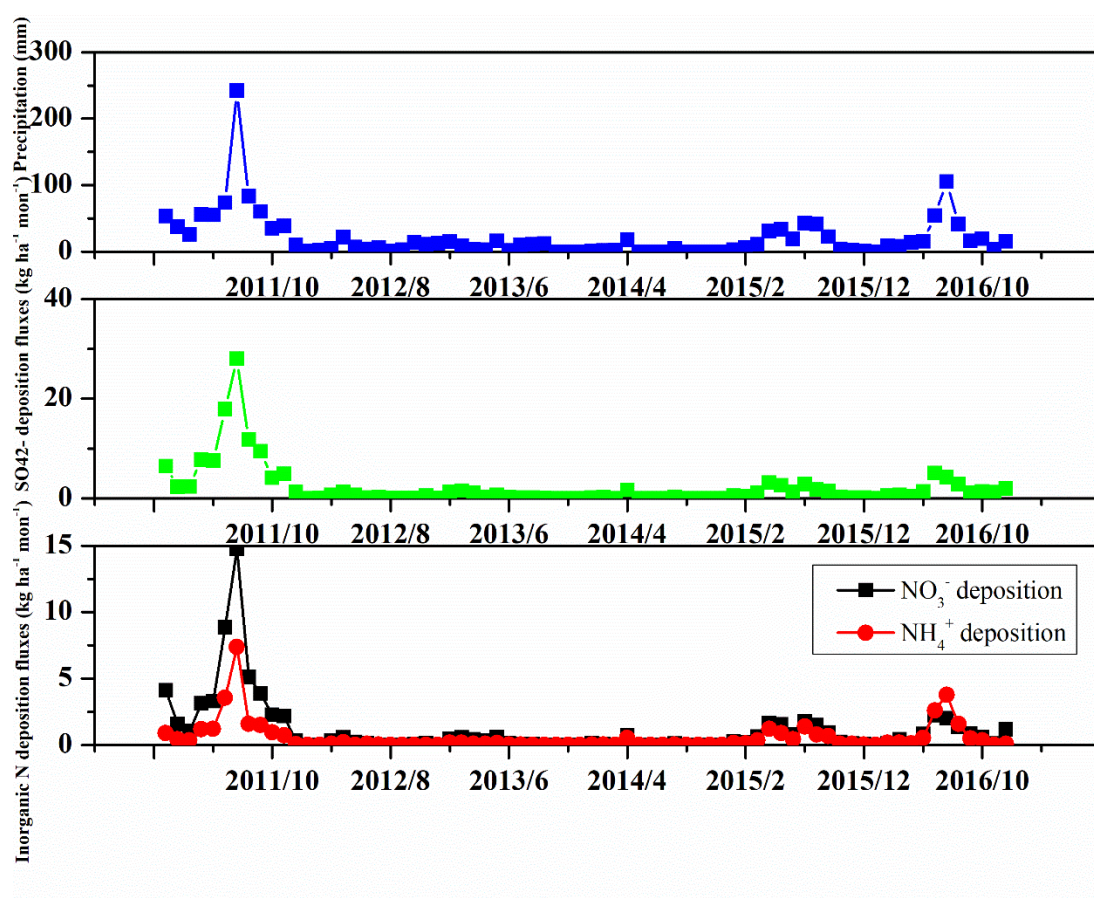

**Fig. S115** The precipitation and wet deposition fluxes of secondary ions in Tieling

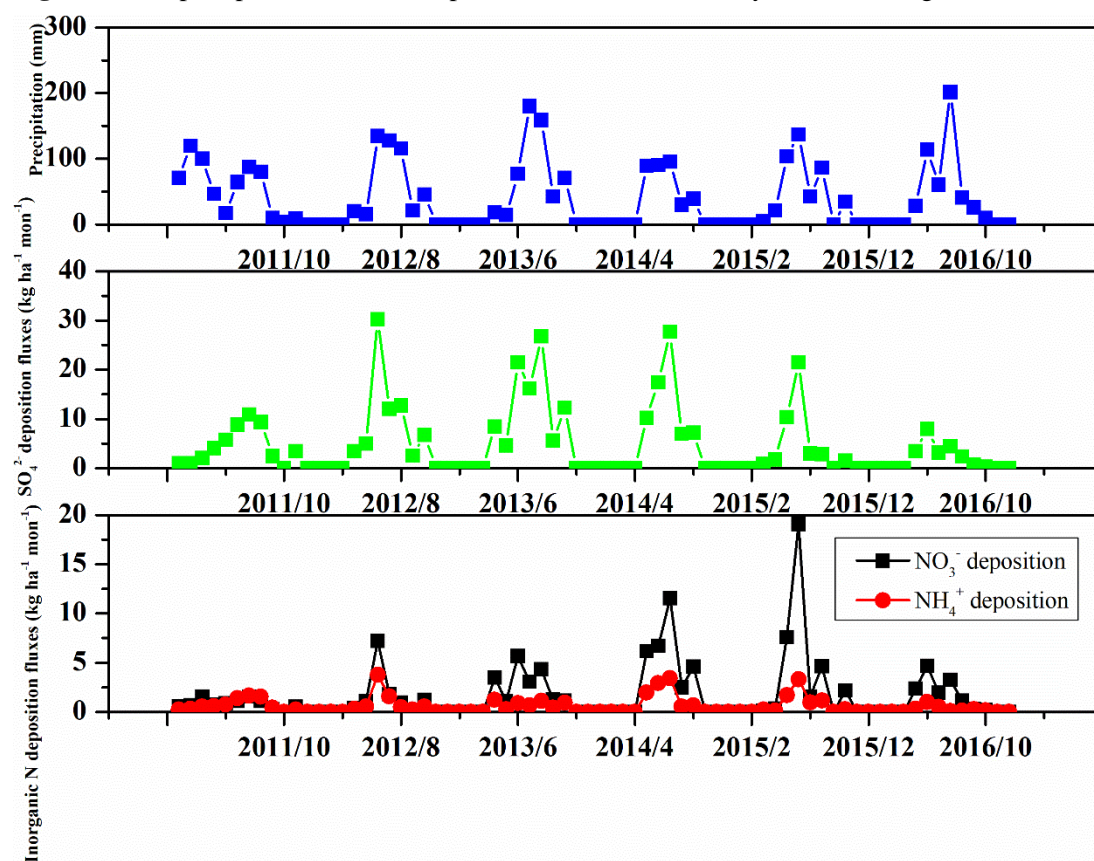

**Fig. S116** The precipitation and wet deposition fluxes of secondary ions in Urumqi

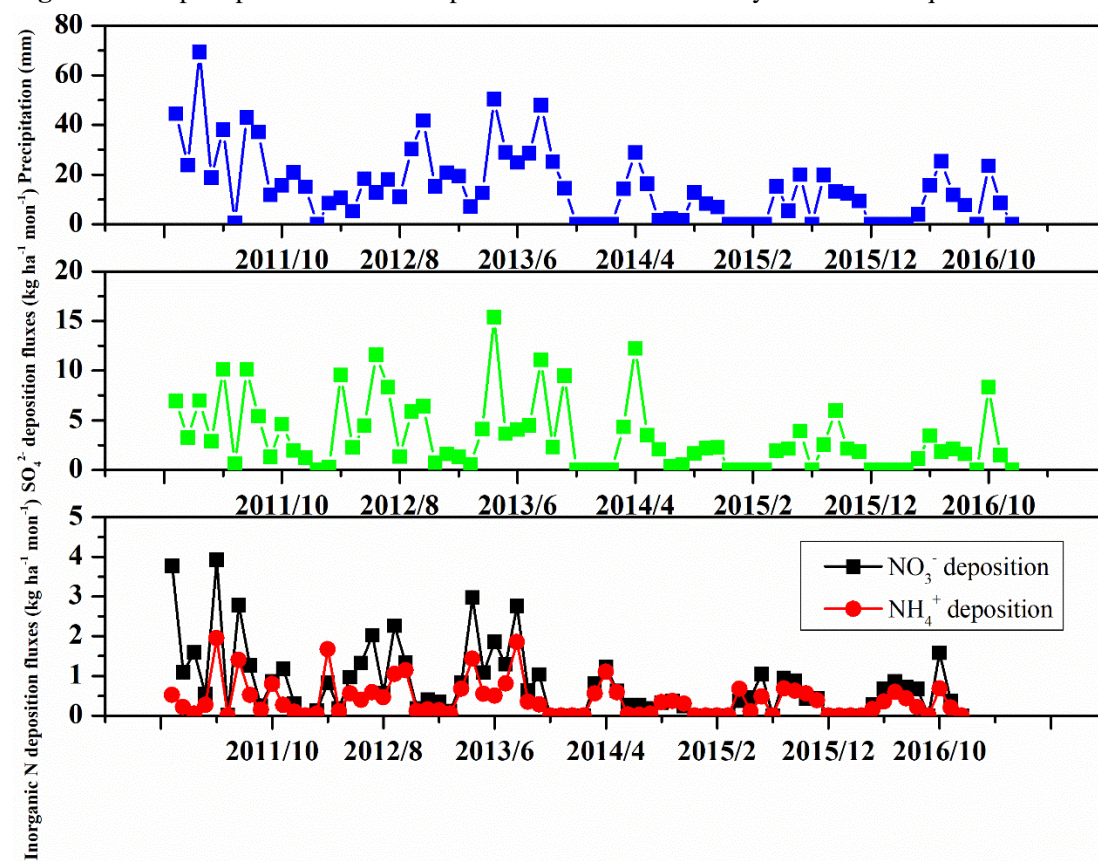

**Fig. S117** The precipitation and wet deposition fluxes of secondary ions in Wuxi

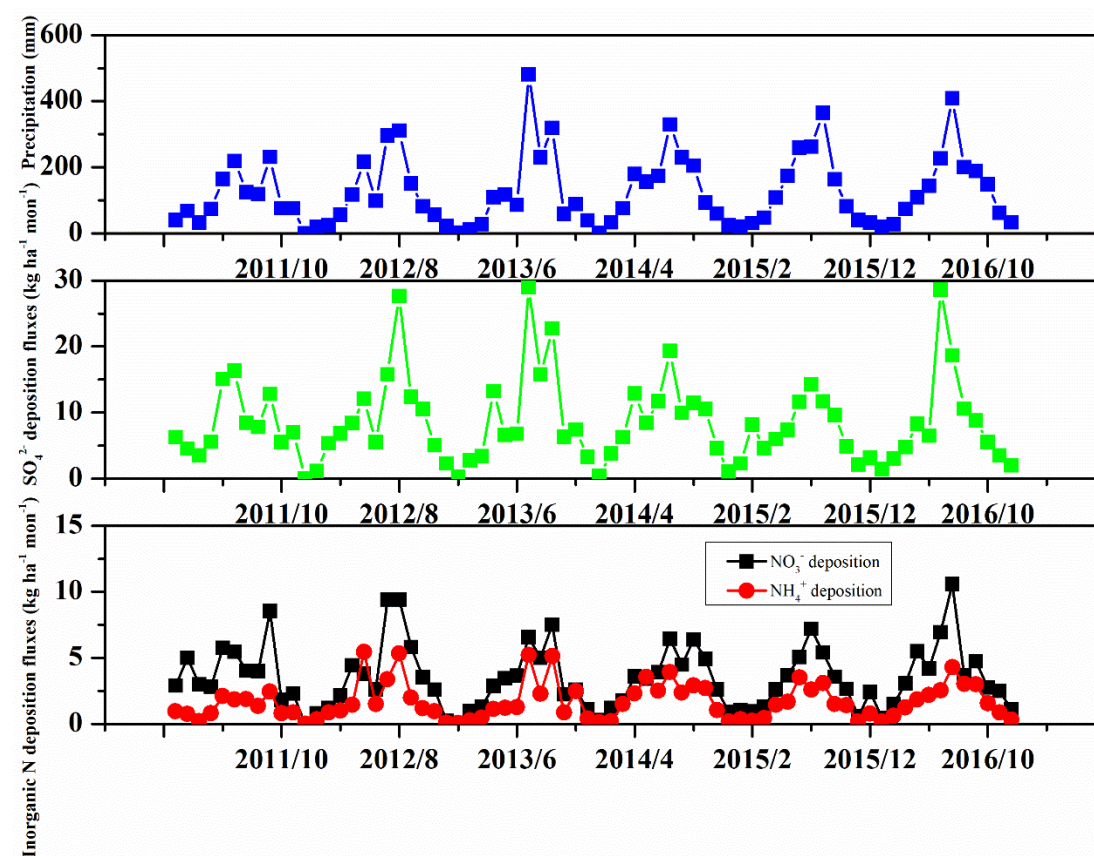



**Fig. S118** The precipitation and wet deposition fluxes of secondary ions in Xinyang

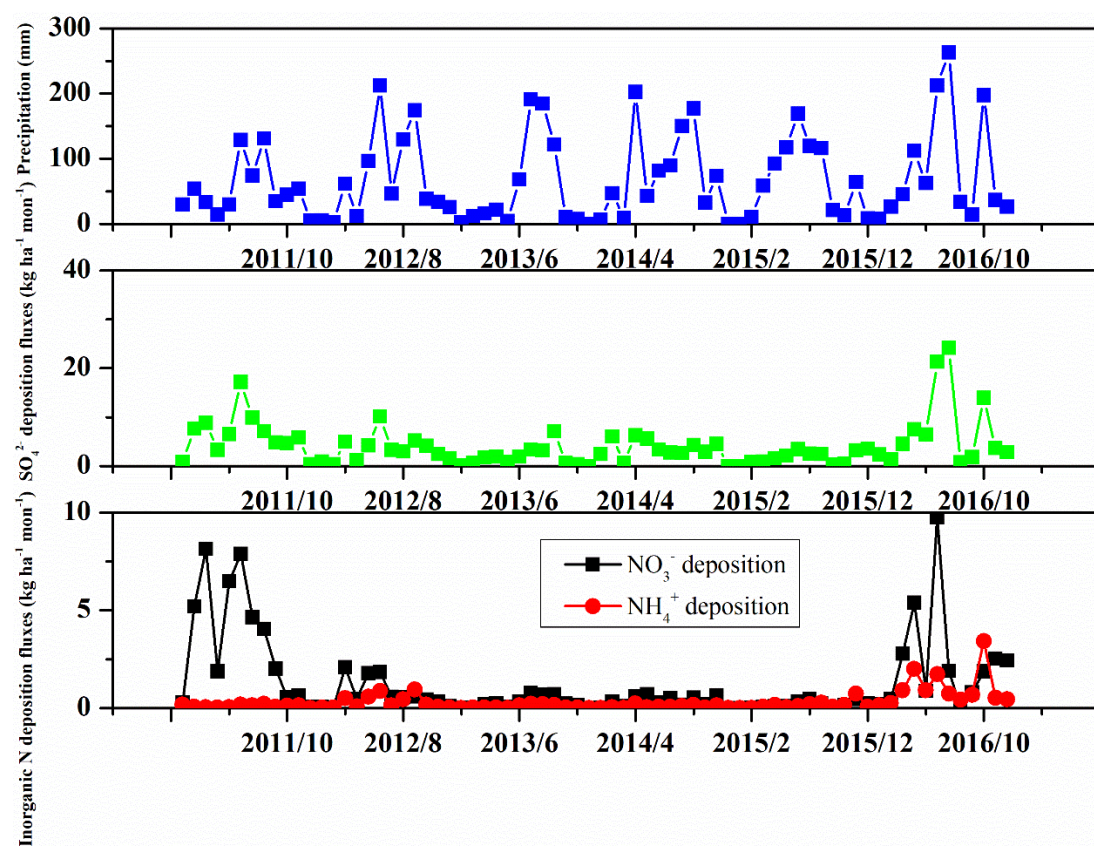



**Fig. S119** The precipitation and wet deposition fluxes of secondary ions in Xingtai

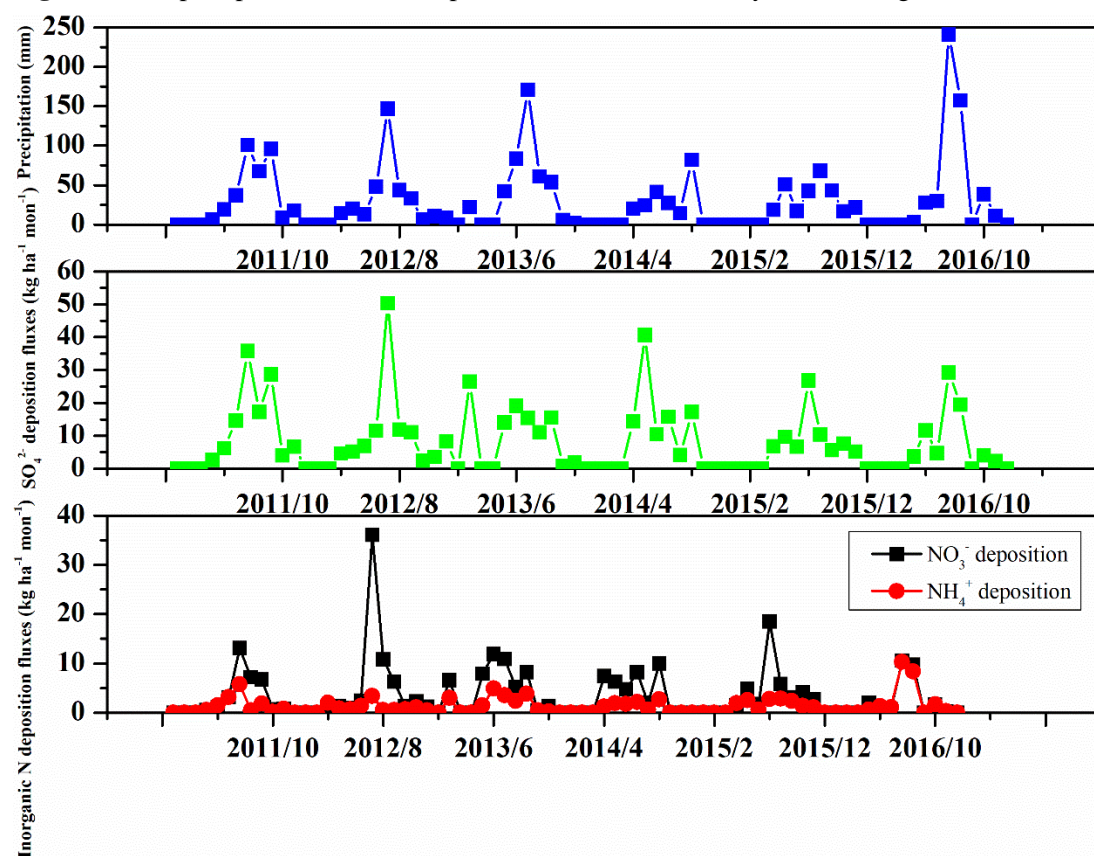

**Fig. S120** The precipitation and wet deposition fluxes of secondary ions in Xuzhou

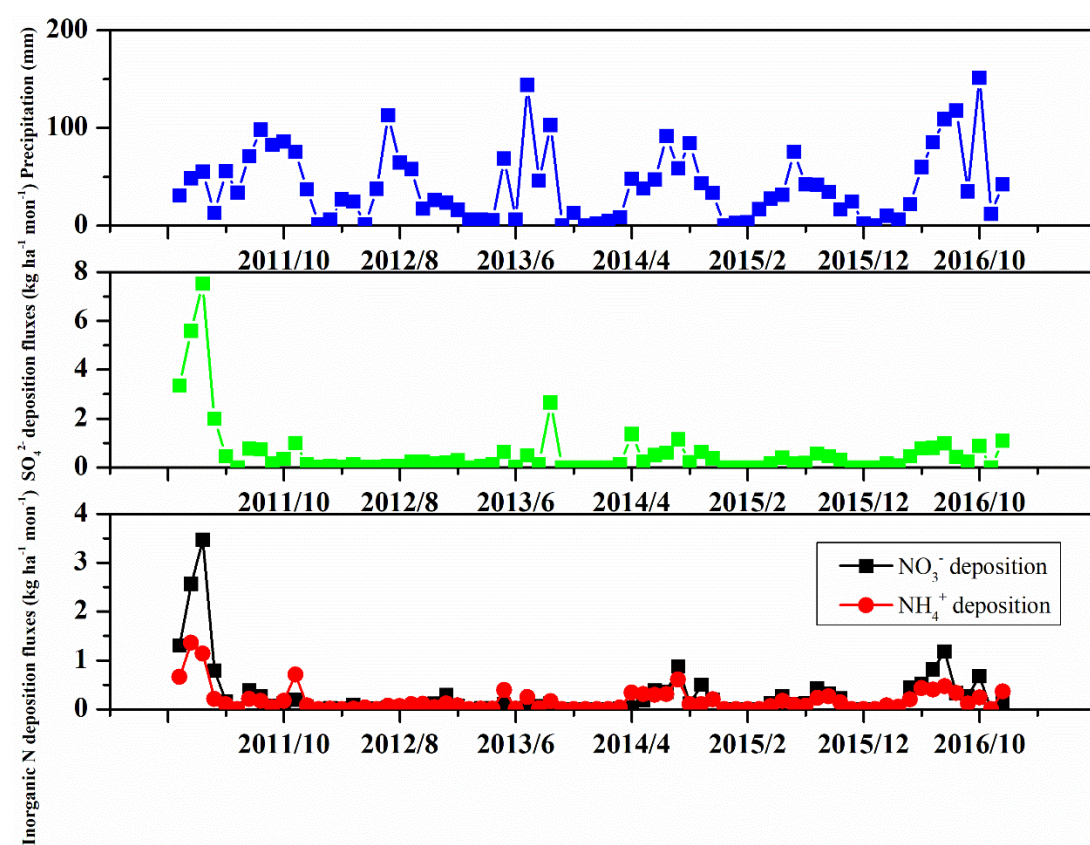

**Fig. S121** The precipitation and wet deposition fluxes of secondary ions in Xuancheng

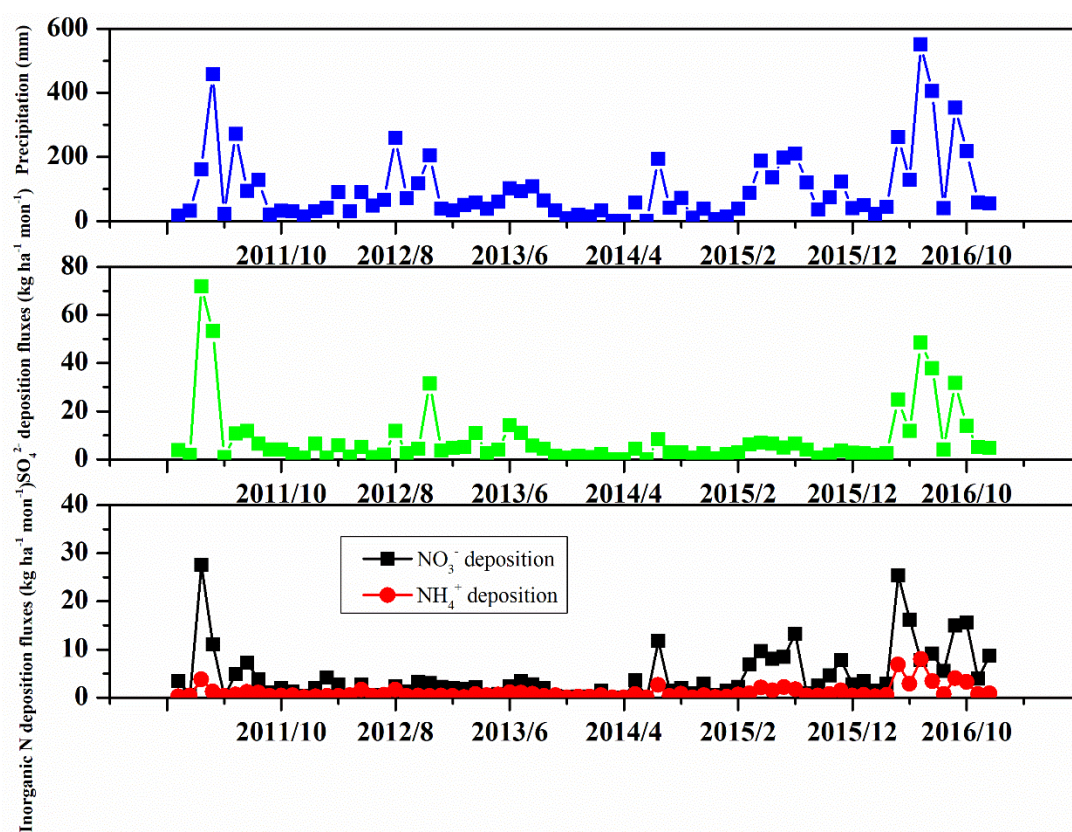

**Fig. S122** The precipitation and wet deposition fluxes of secondary ions in Ya'an

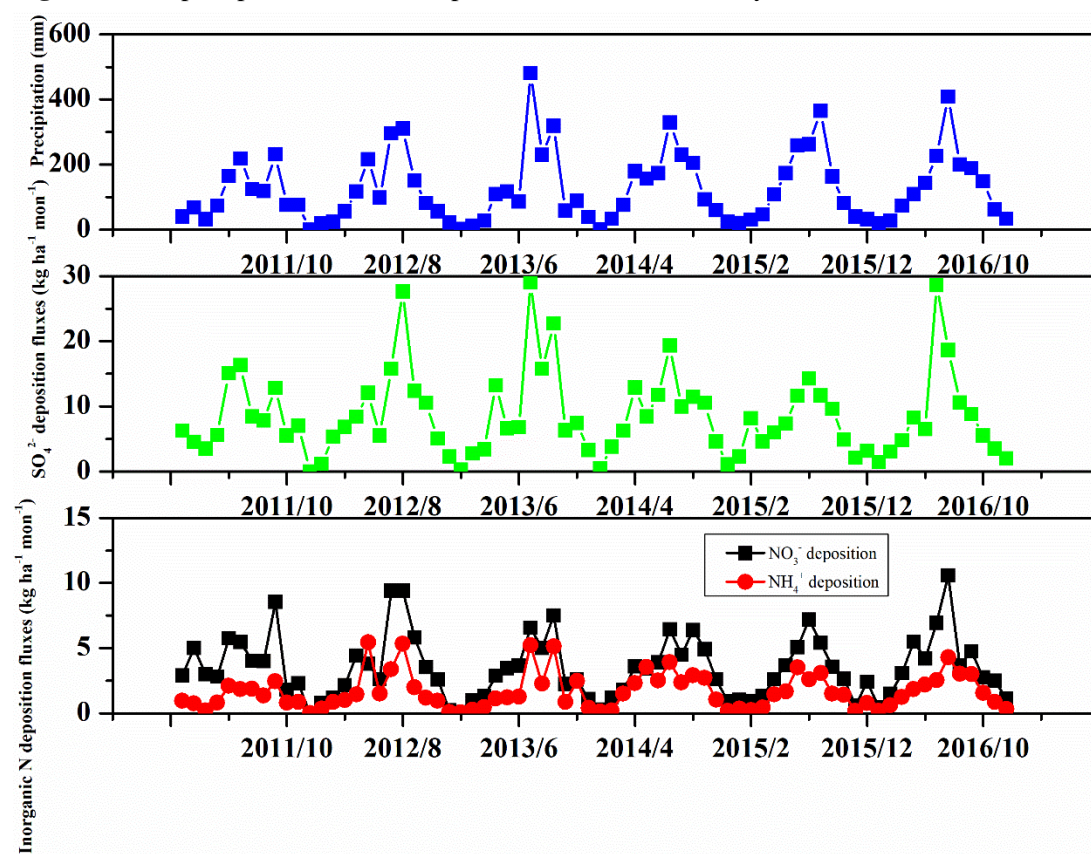

**Fig. S123** The precipitation and wet deposition fluxes of secondary ions in Yancheng

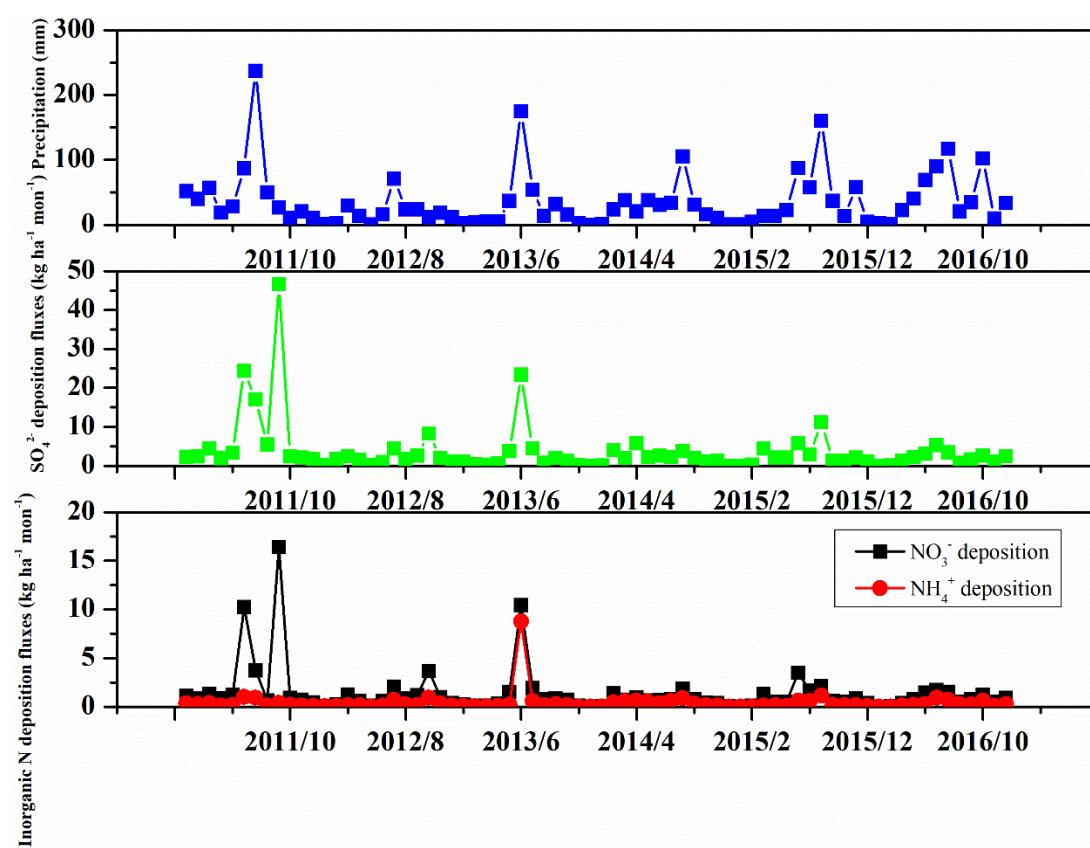



**Fig. S124** The precipitation and wet deposition fluxes of secondary ions in Yangzhou

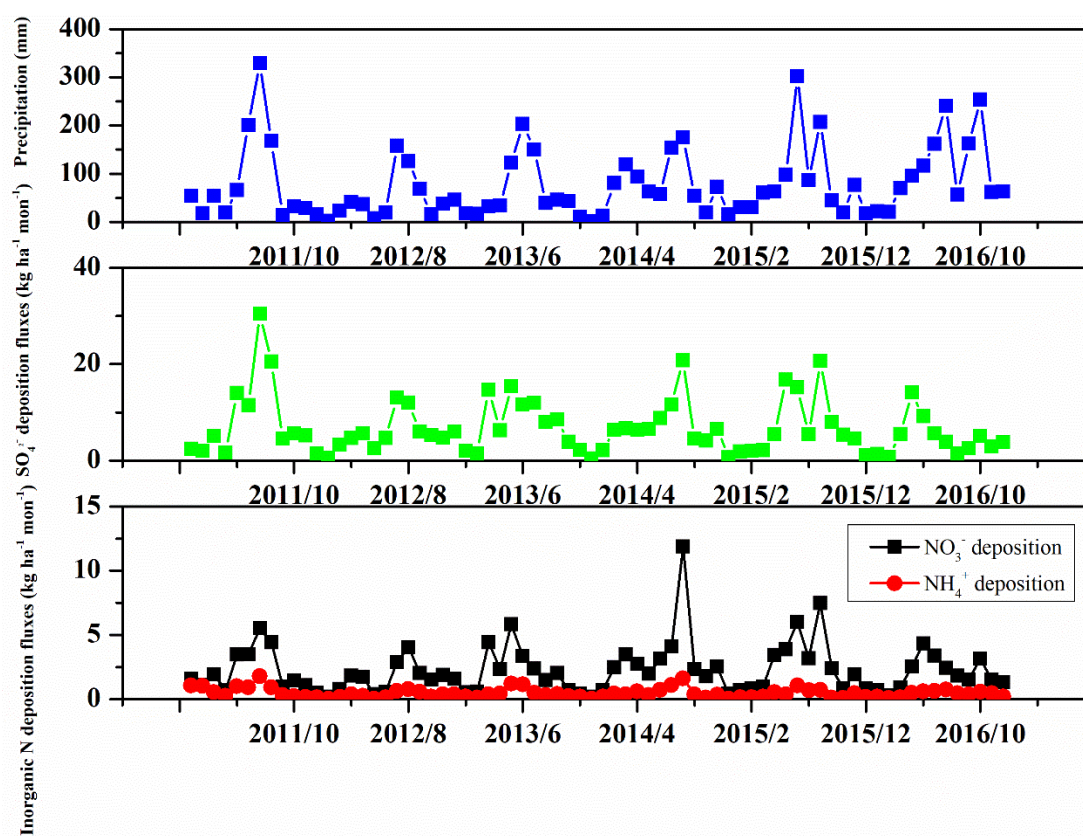



**Fig. S125** The precipitation and wet deposition fluxes of secondary ions in Yichun

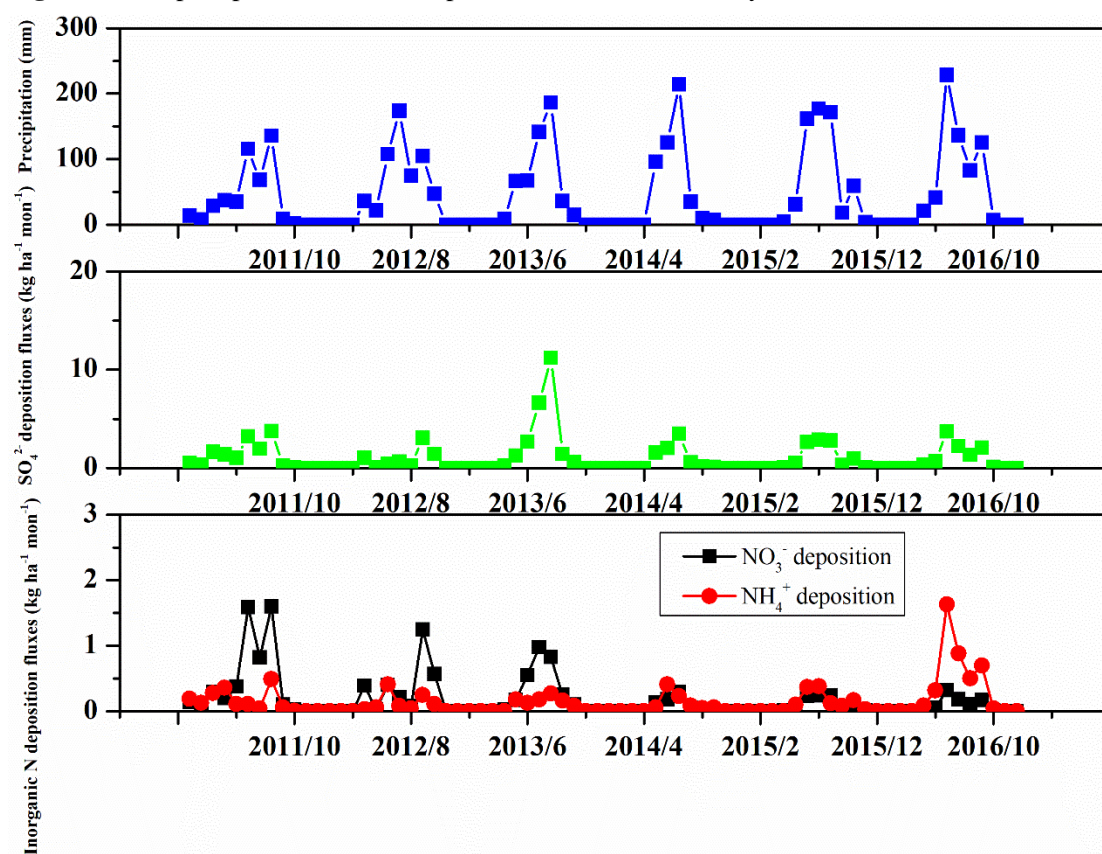

**Fig. S126** The precipitation and wet deposition fluxes of secondary ions in Yili

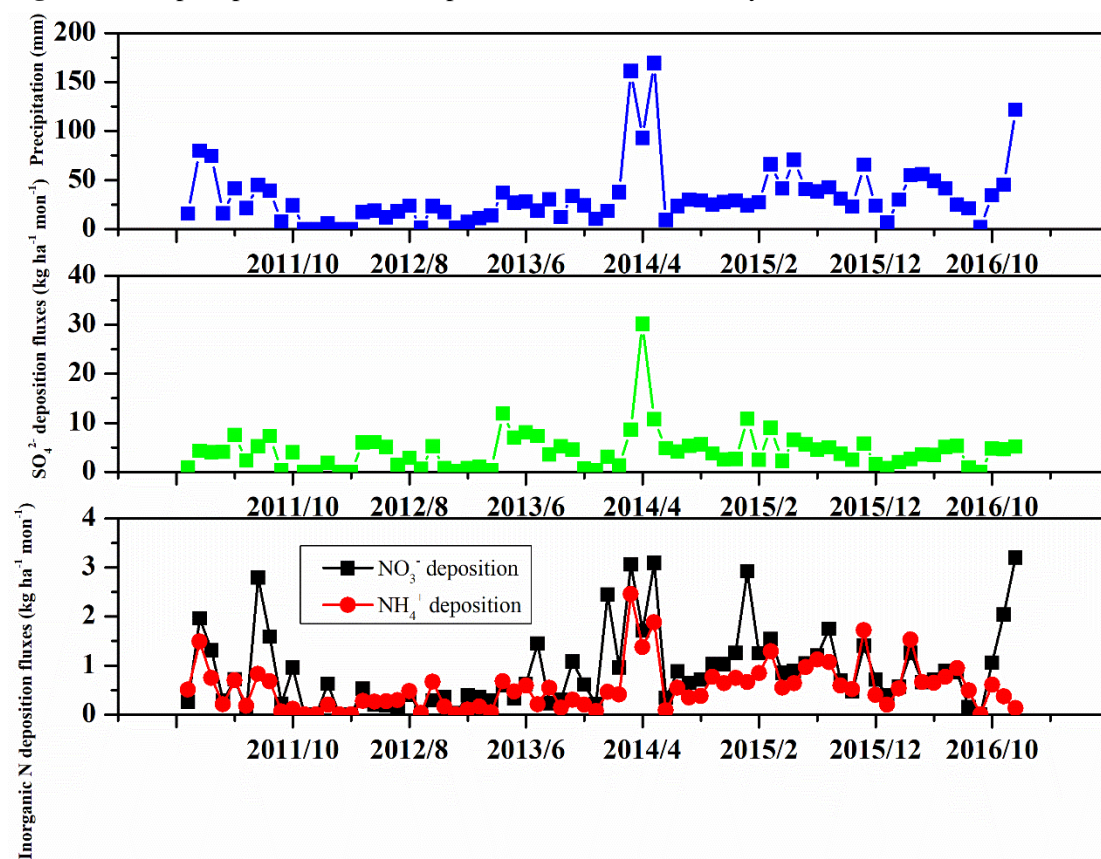

**Fig. S127** The precipitation and wet deposition fluxes of secondary ions in Yibin

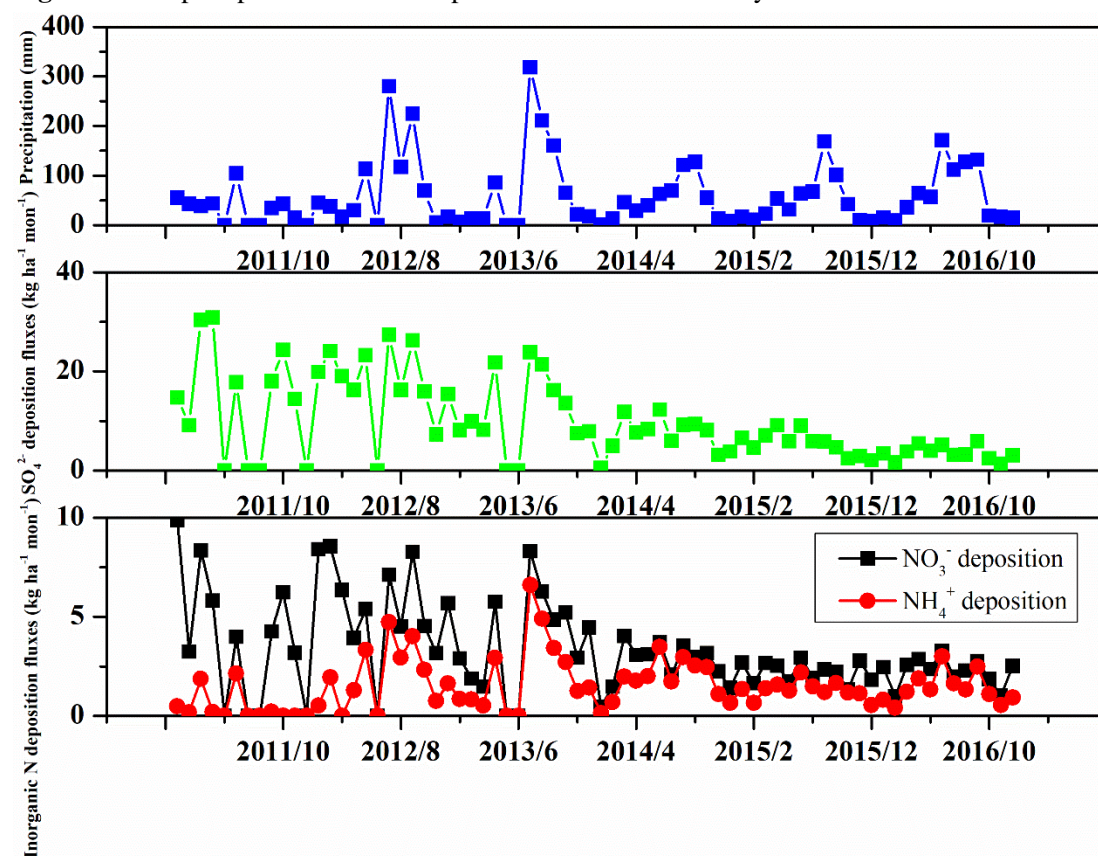

**Fig. S128** The precipitation and wet deposition fluxes of secondary ions in Yuncheng

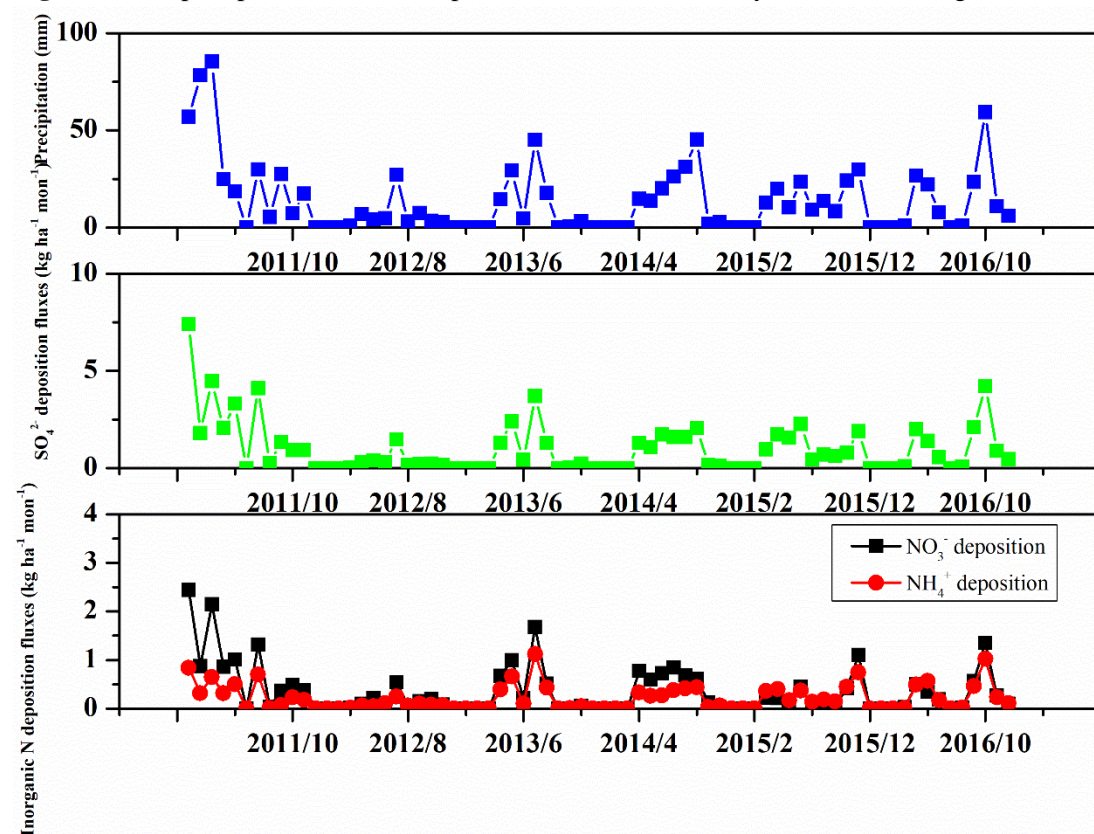

**Fig. S129** The precipitation and wet deposition fluxes of secondary ions in Zhangjiakou

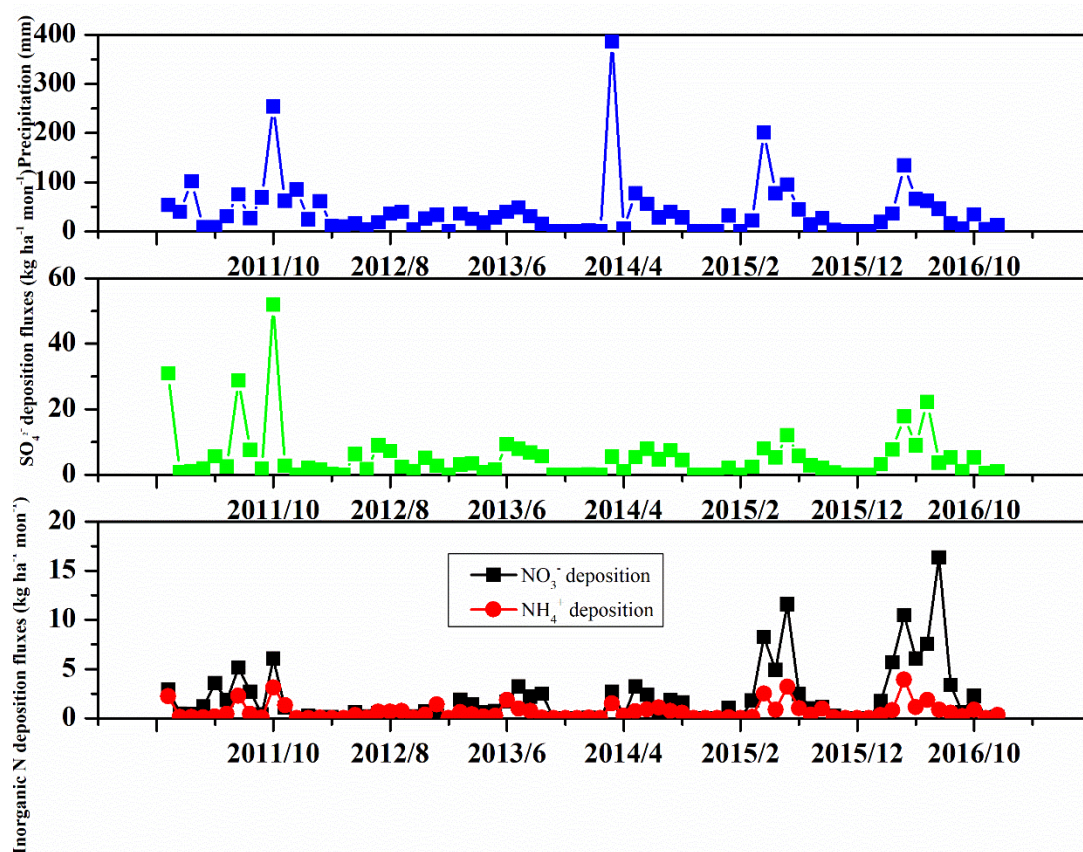



**Fig. S130** The precipitation and wet deposition fluxes of secondary ions in Changzhi

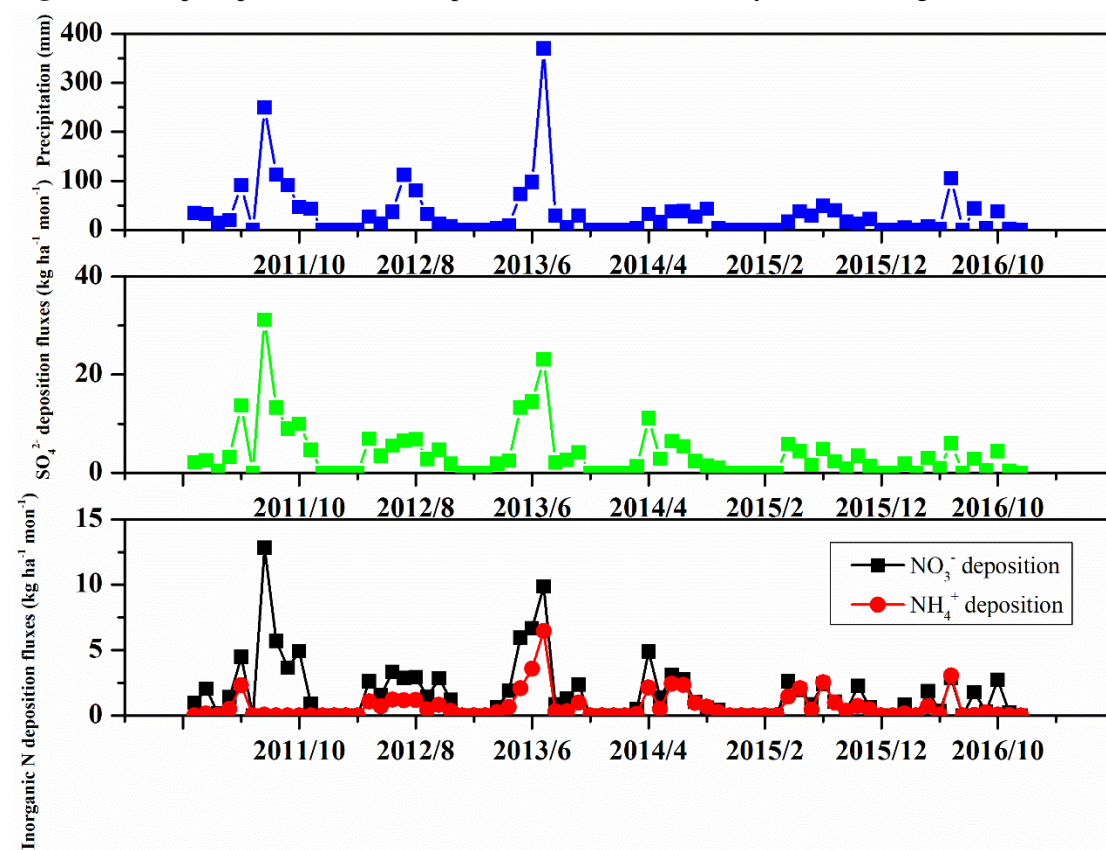



**Fig. S131** The precipitation and wet deposition fluxes of secondary ions in Zhengzhou

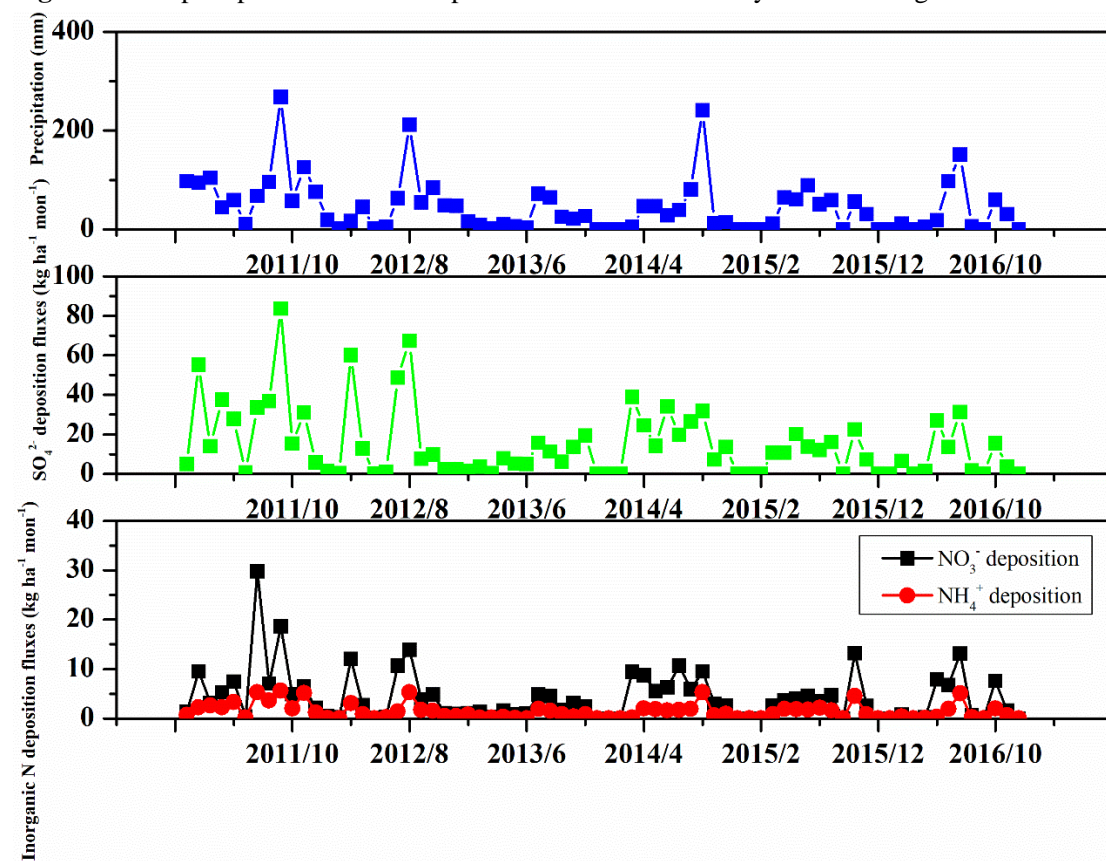

**Fig. S132** The precipitation and wet deposition fluxes of secondary ions in Zhumadian

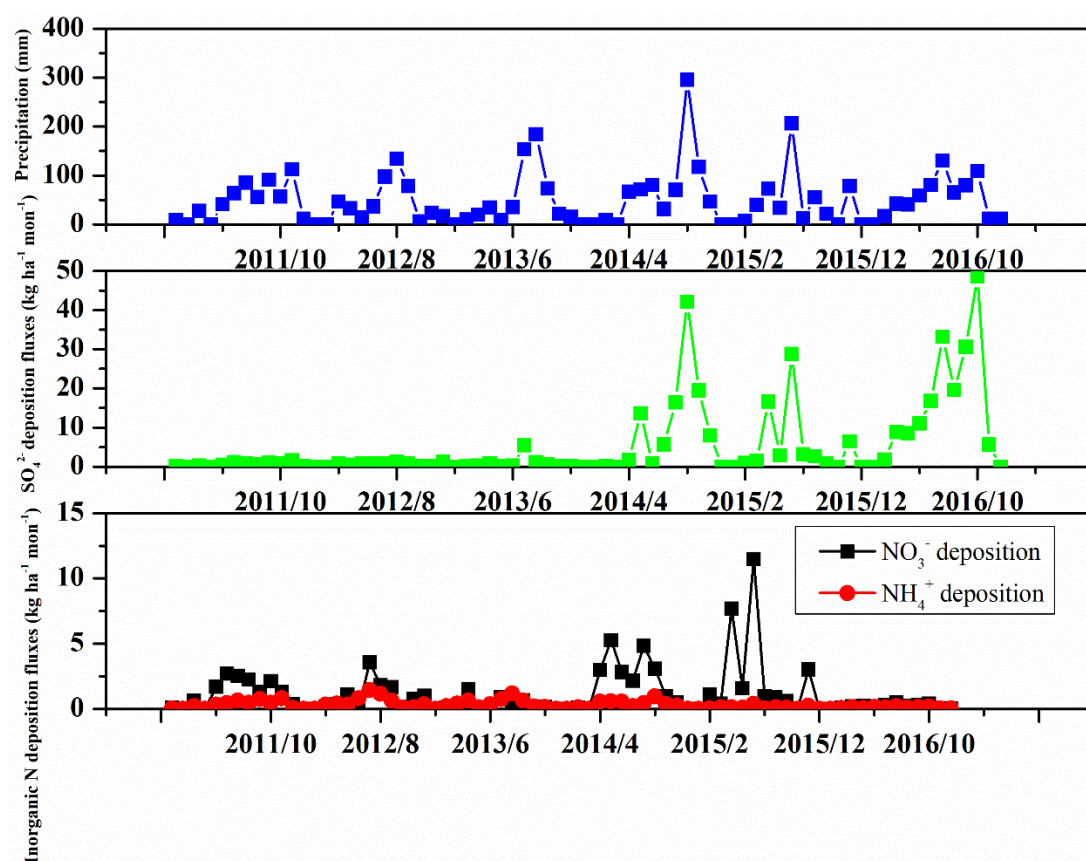

**Fig. S133** The precipitation and wet deposition fluxes of secondary ions in Zunyi

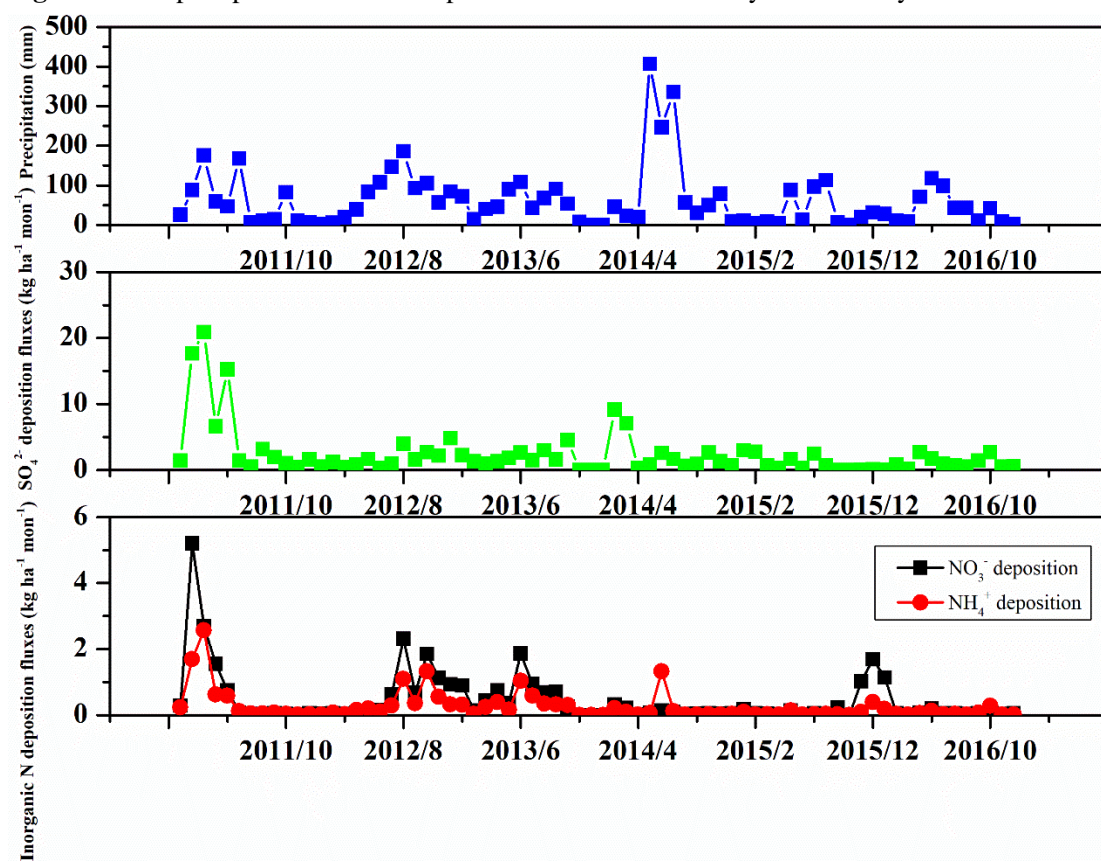

**Fig. S134** The precipitation and wet deposition fluxes of secondary ions in Taizhou

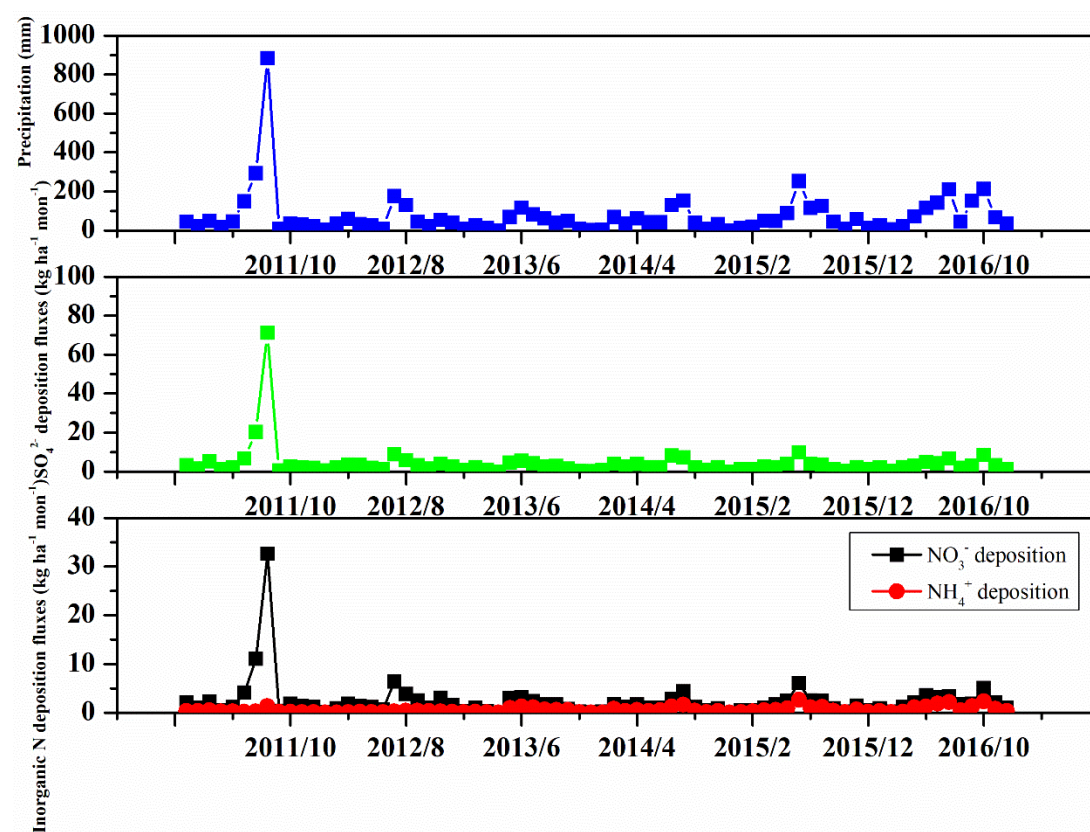

**Fig. S135** The precipitation and wet deposition fluxes of secondary ions in Taian

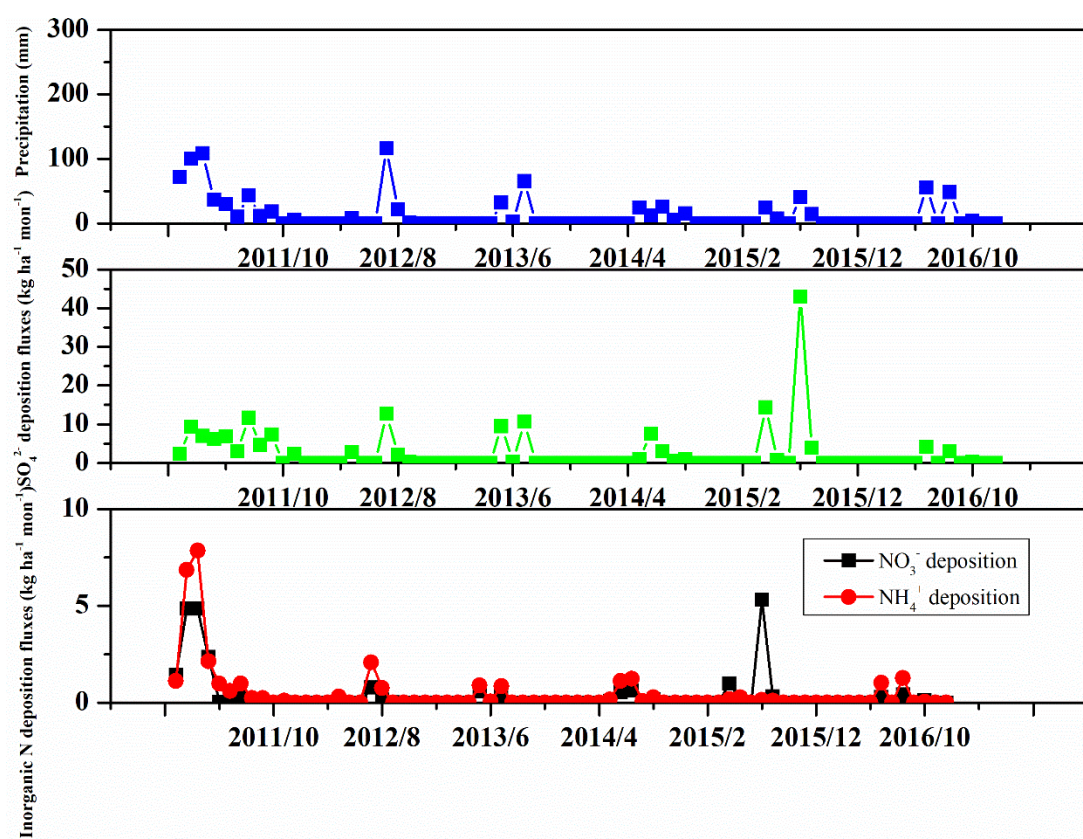



**Fig. S136** The precipitation and wet deposition fluxes of secondary ions in Xilinguole

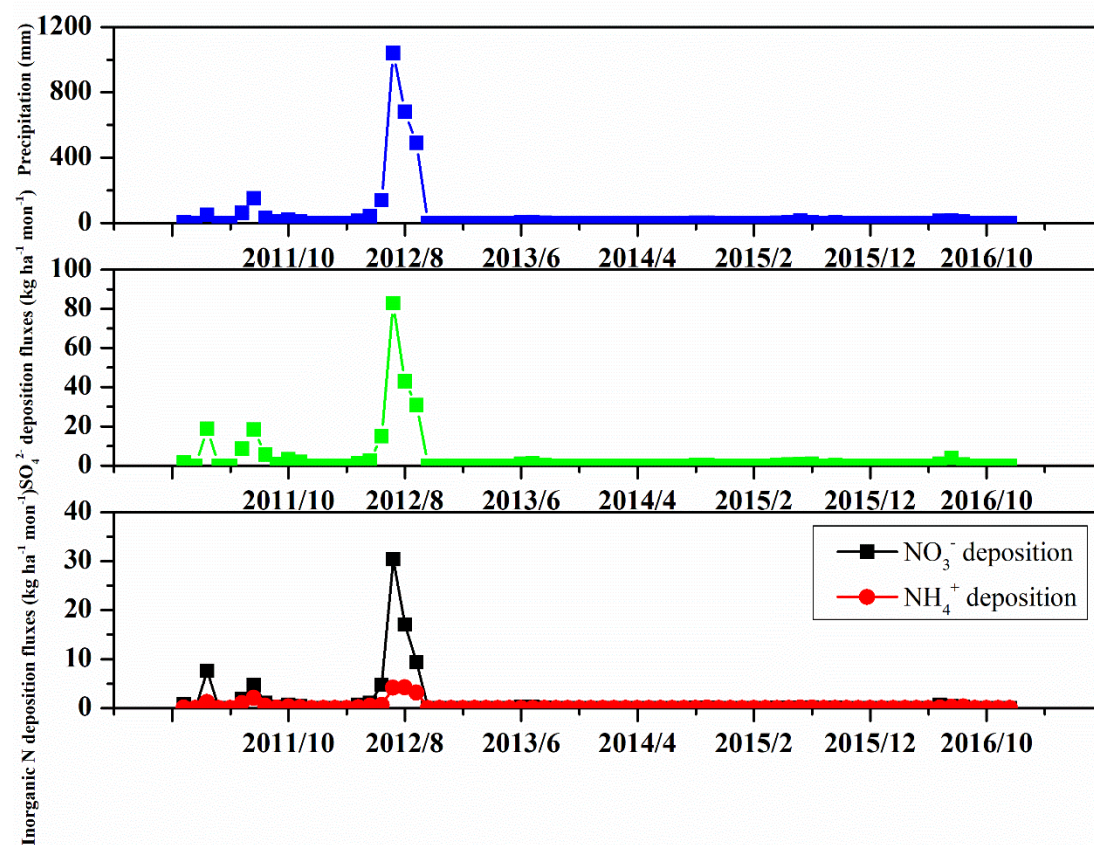

**Fig. S137** The precipitation and wet deposition fluxes of secondary ions in Qinhuangdao

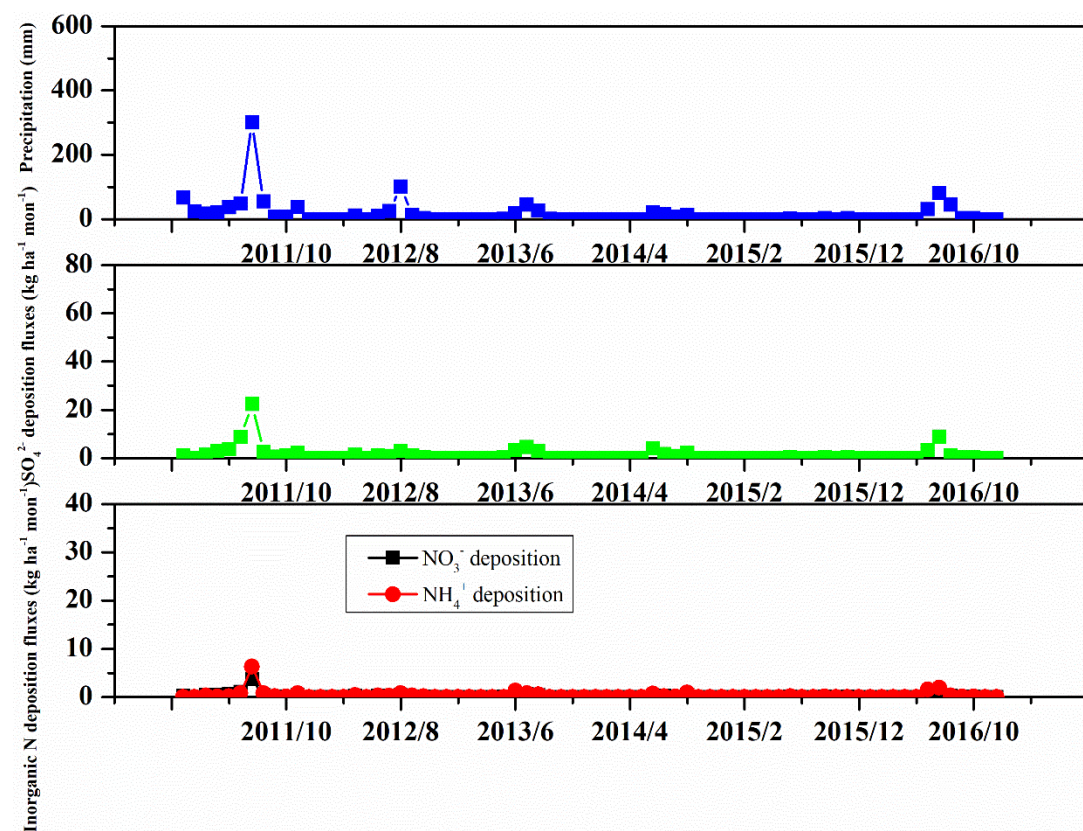

**Fig. S138** The precipitation and wet deposition fluxes of secondary ions in Baotou

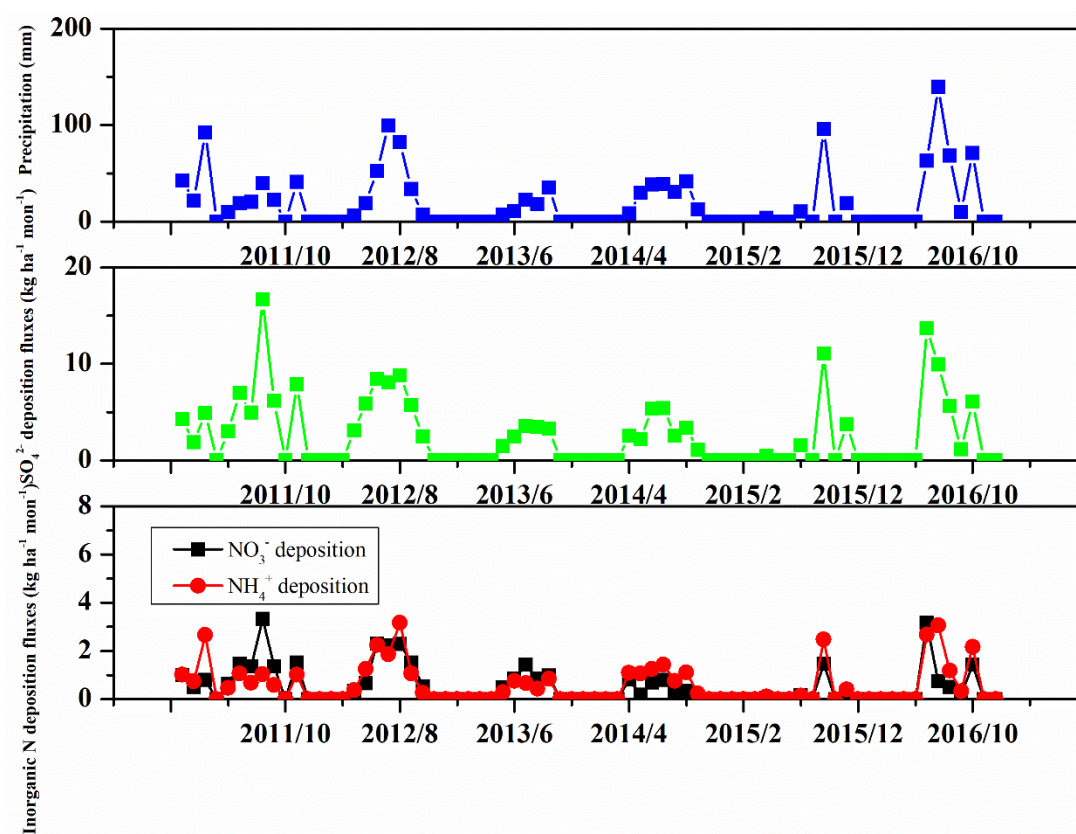

**Fig. S139** The precipitation and wet deposition fluxes of secondary ions in Qingdao

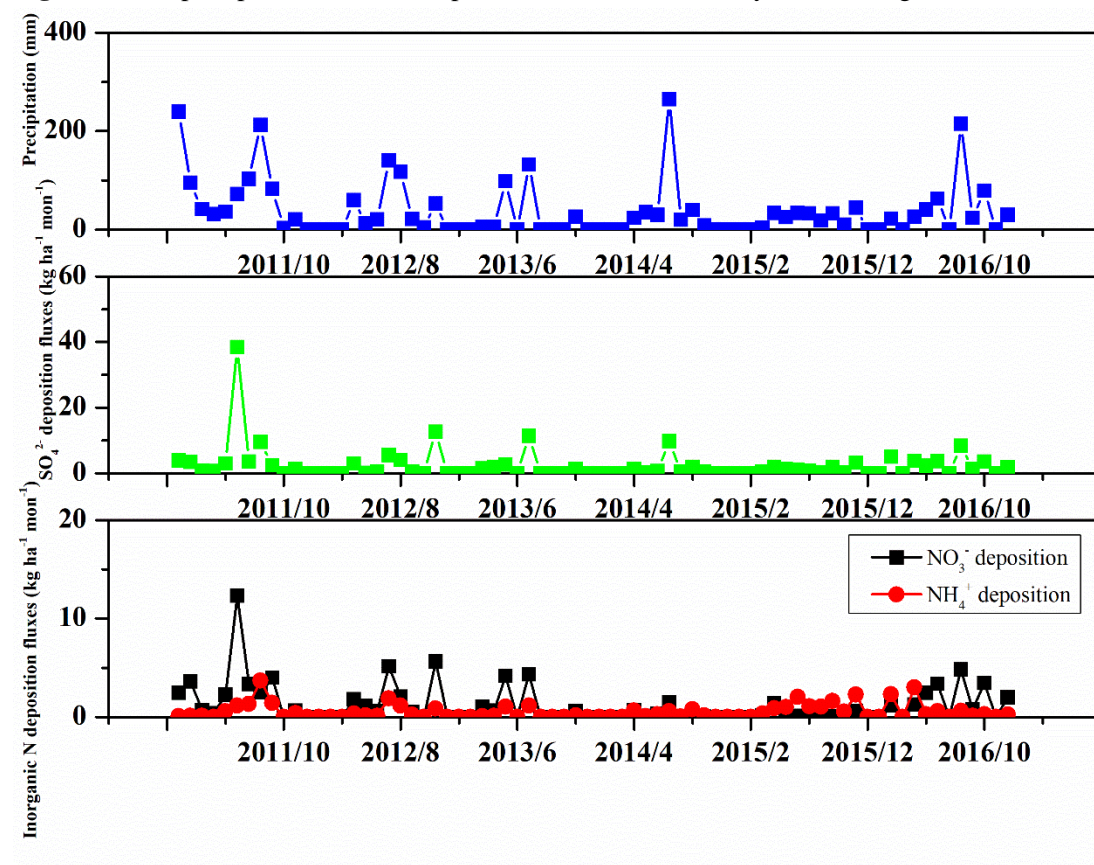

**Fig. S140** The precipitation and wet deposition fluxes of secondary ions in Ziyang

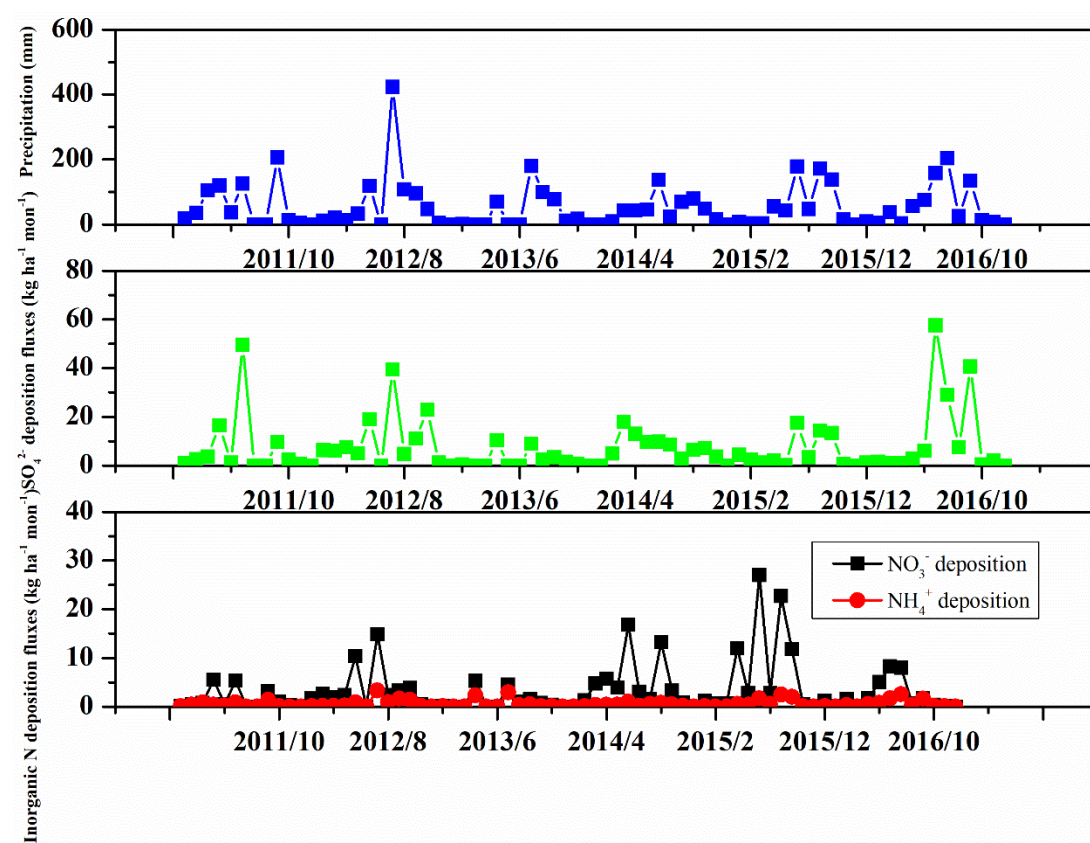



**Fig. S141** The precipitation and wet deposition fluxes of secondary ions in Lincang

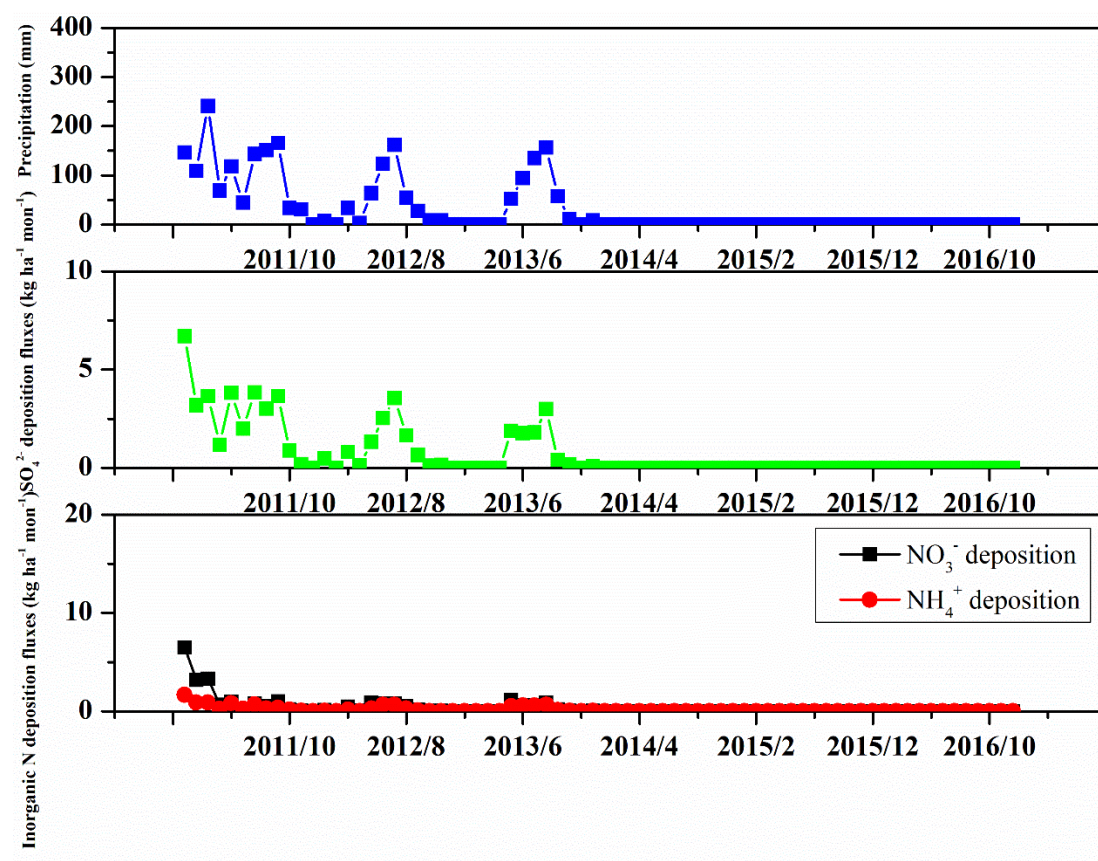

**Fig. S142** The precipitation and wet deposition fluxes of secondary ions in Guangan

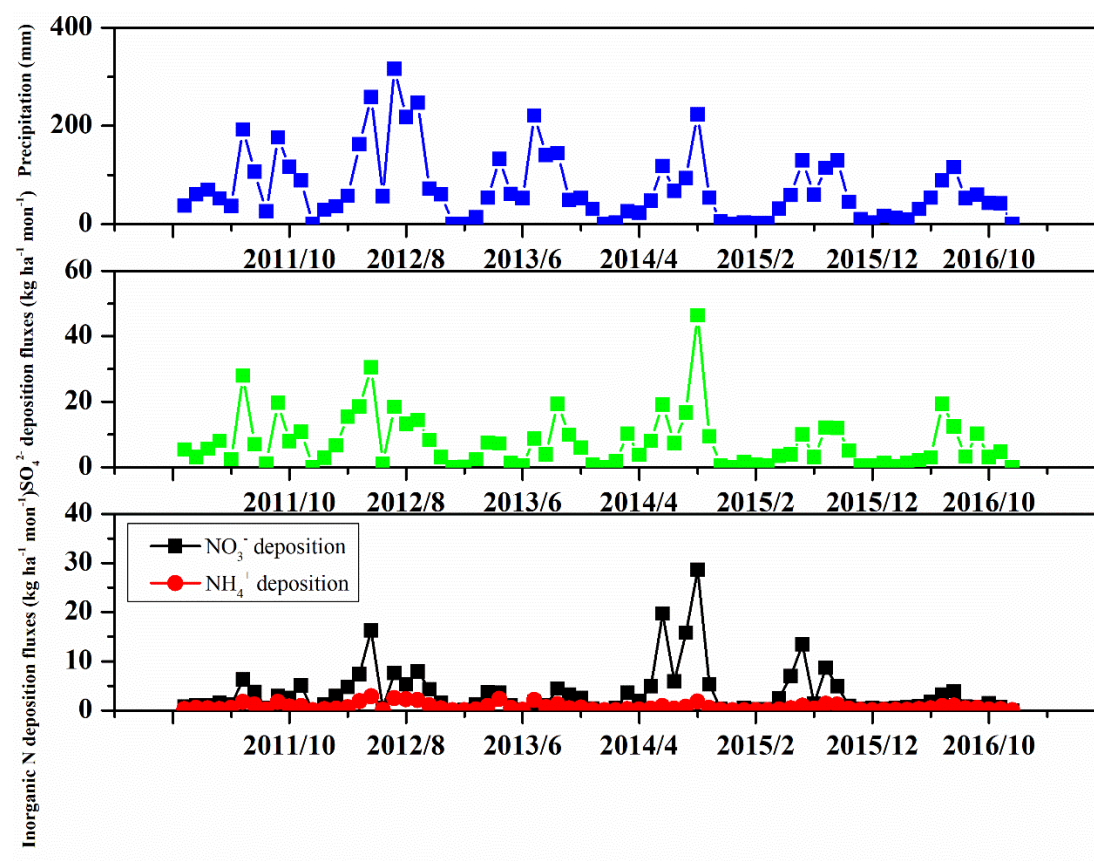

**Fig. S143** The precipitation and wet deposition fluxes of secondary ions in Huludao

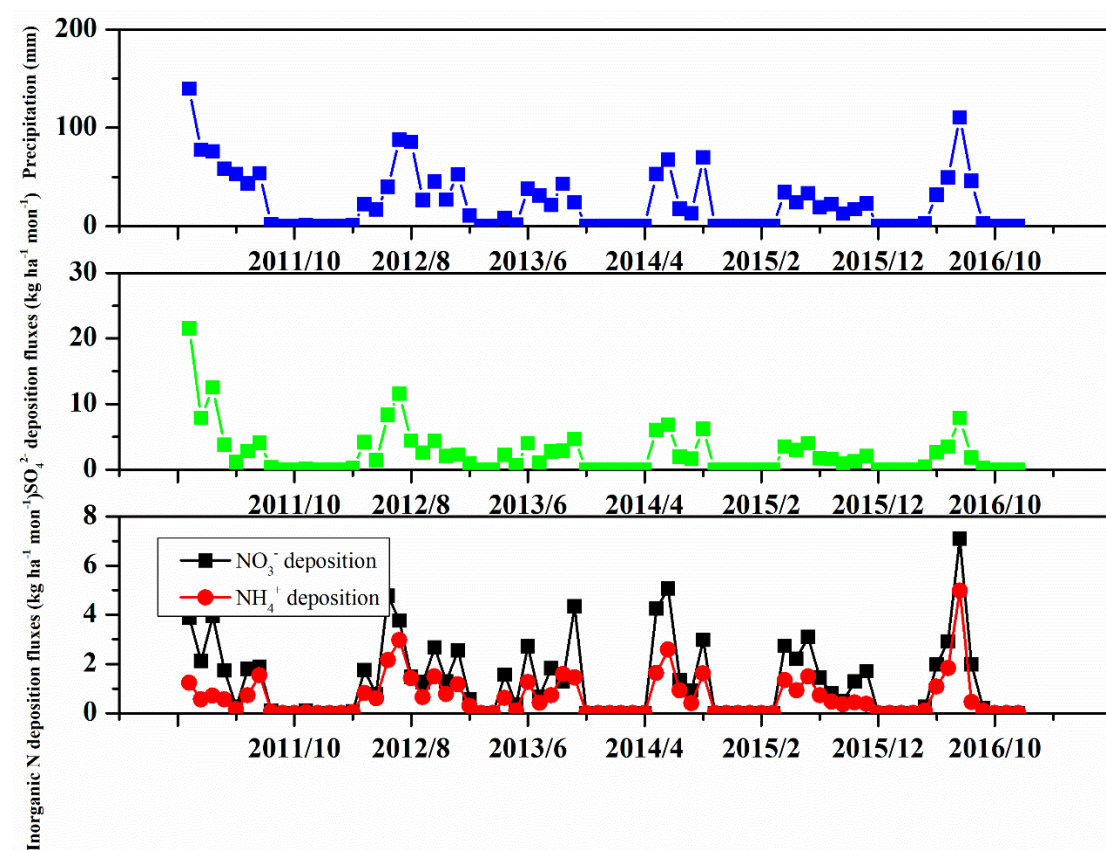

**Fig. S144** The precipitation and wet deposition fluxes of secondary ions in Panjin

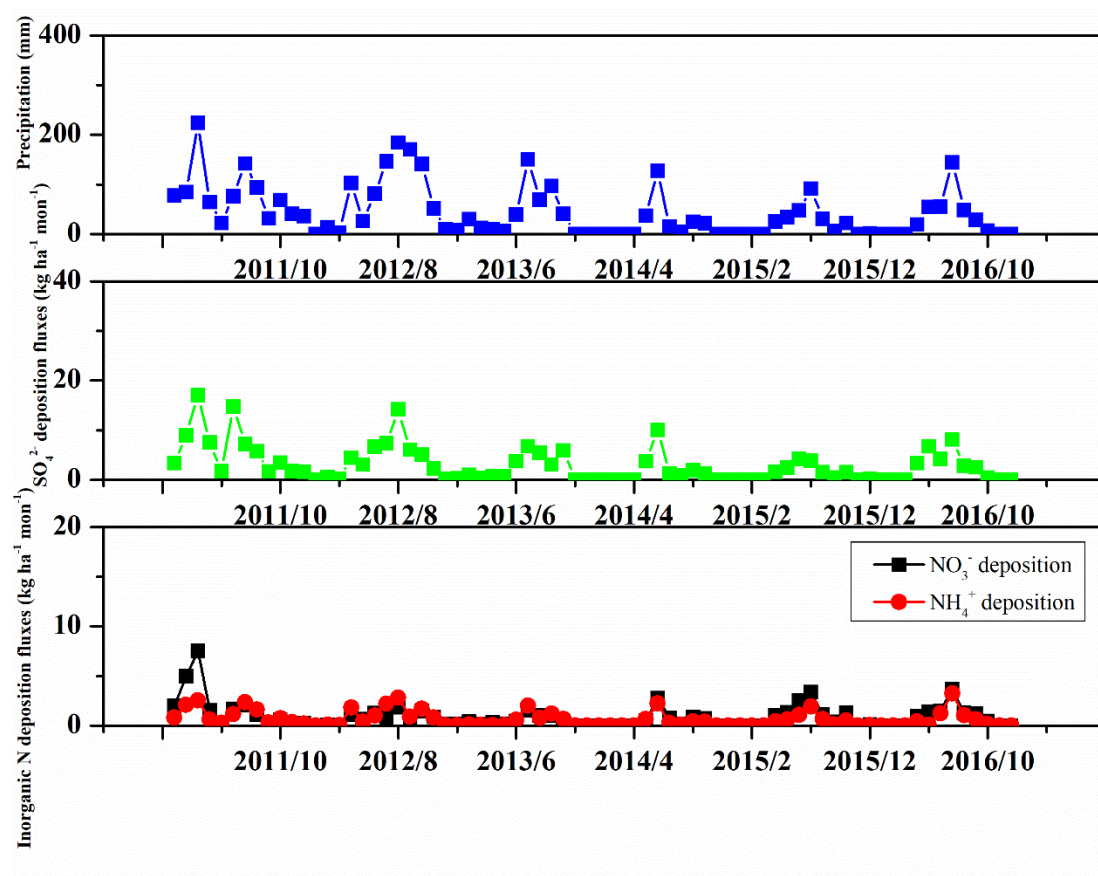

**Fig. S145** The precipitation and wet deposition fluxes of secondary ions in Luohe

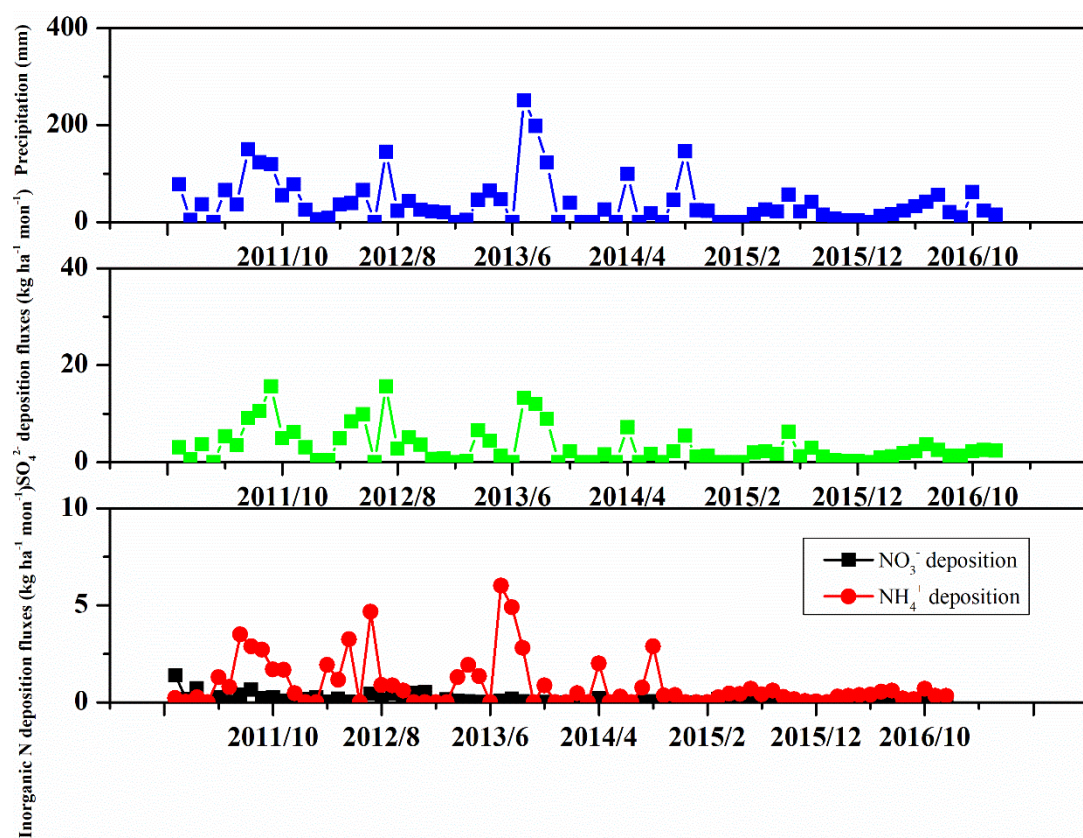



**Fig. S146** The precipitation and wet deposition fluxes of secondary ions in Huainan

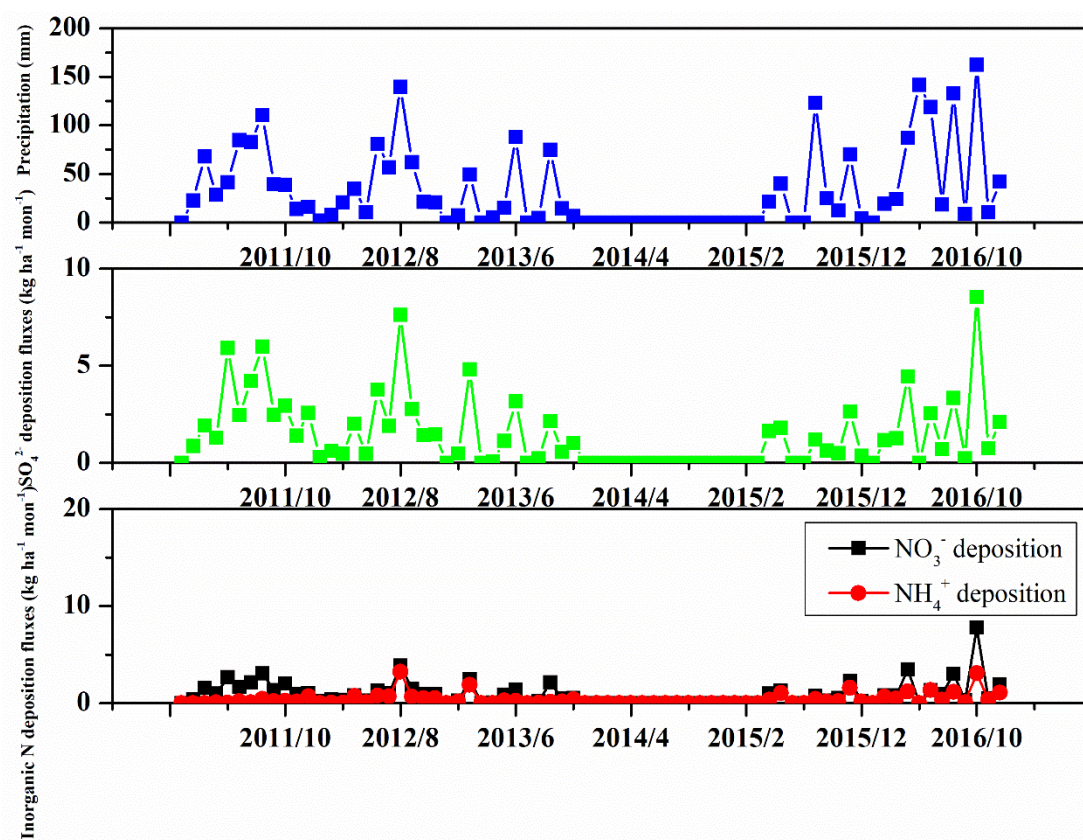

**Fig. S147** The precipitation and wet deposition fluxes of secondary ions in Baoding

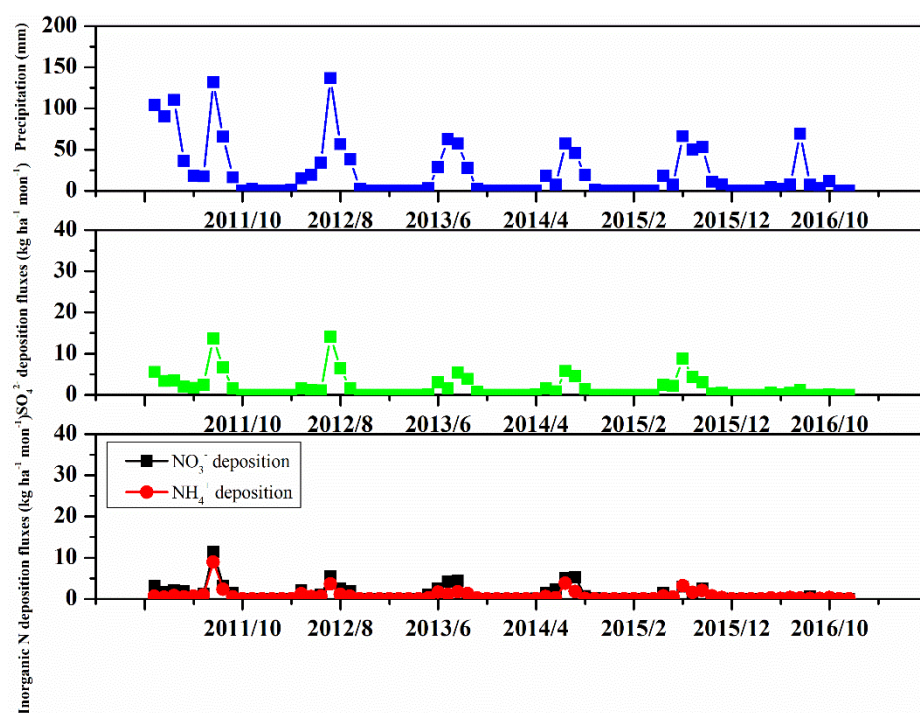

**Fig. S148** The precipitation and wet deposition fluxes of secondary ions in Nanping

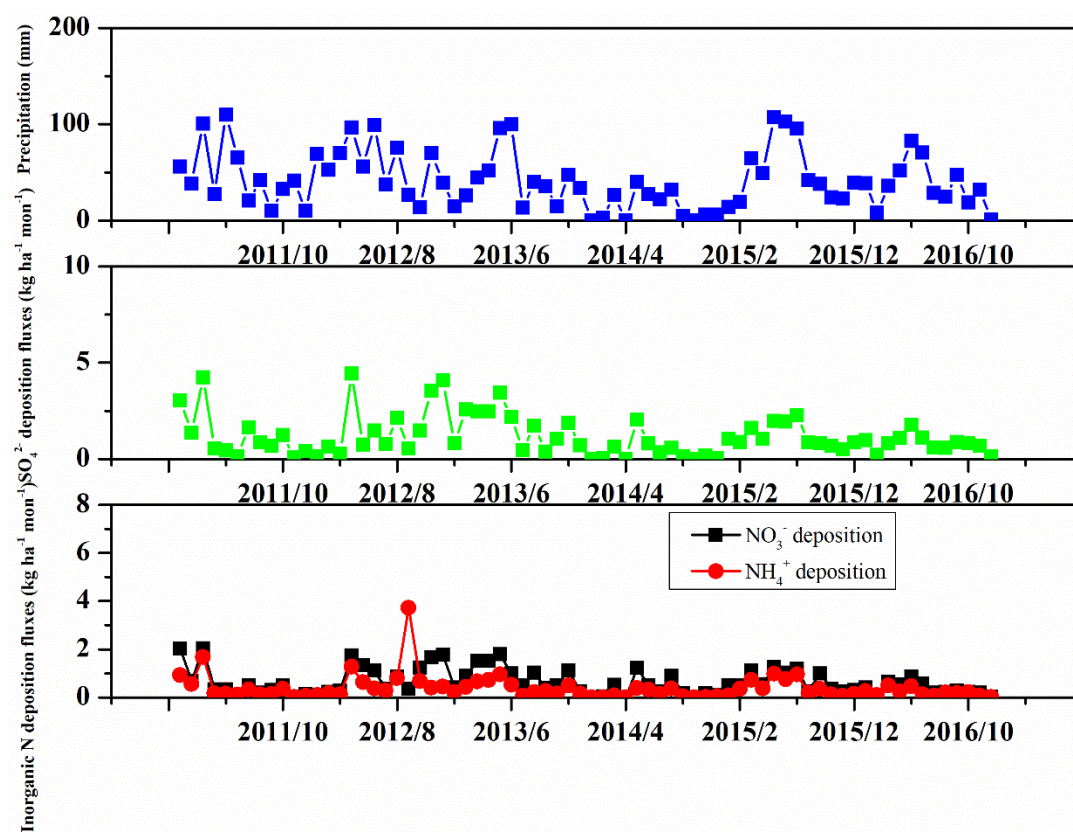

**Fig. S149** The precipitation and wet deposition fluxes of secondary ions in Bazhong

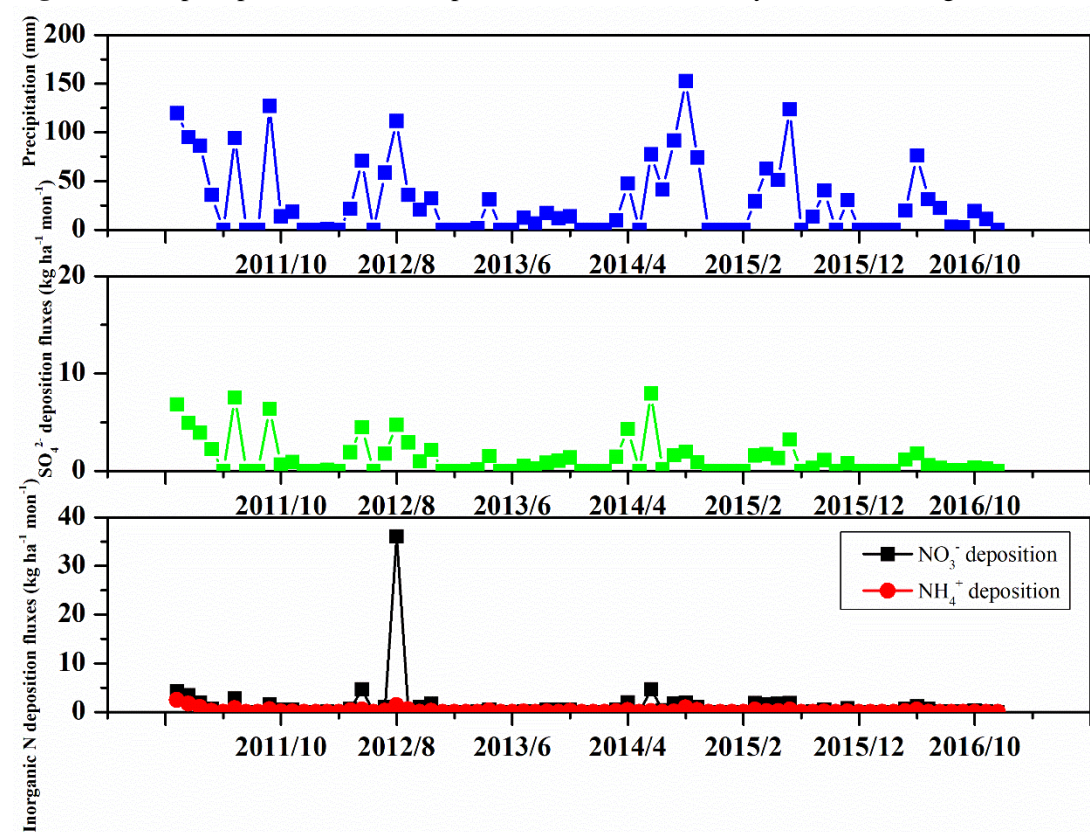

**Fig. S150** The precipitation and wet deposition fluxes of secondary ions in Ningde

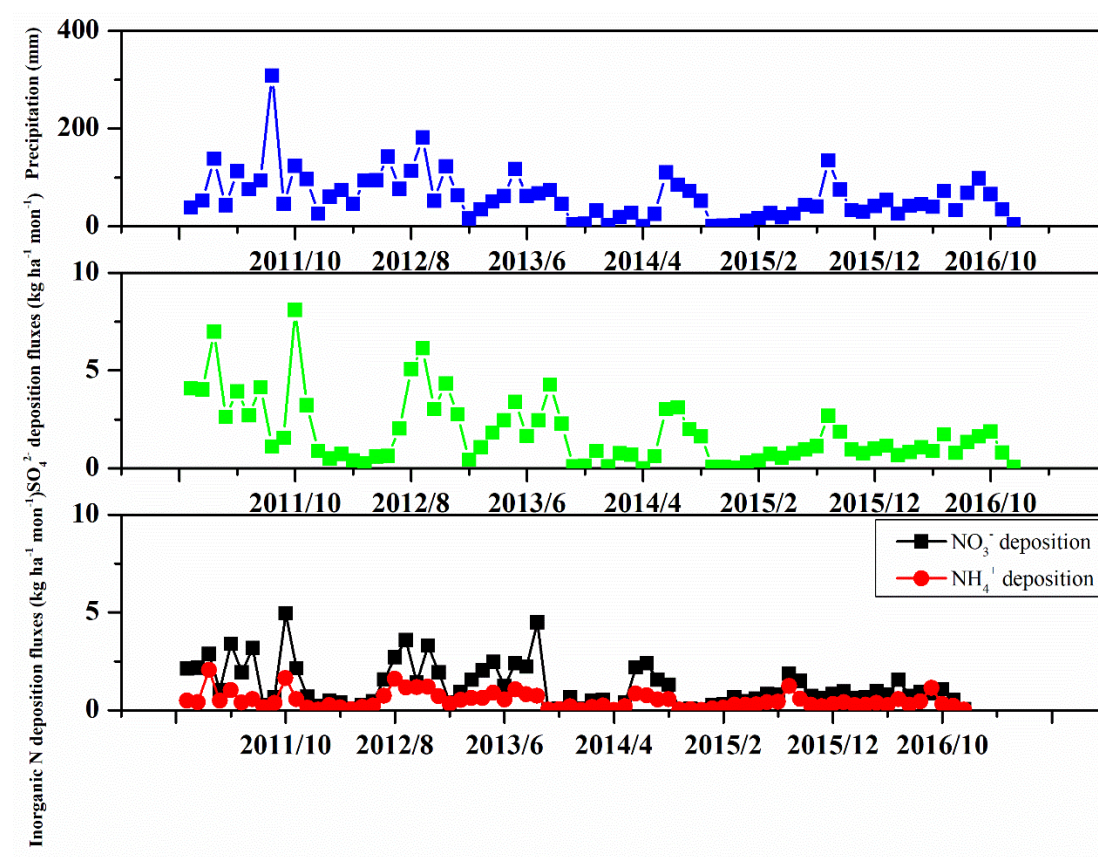



**Fig. S151** The precipitation and wet deposition fluxes of secondary ions in Putian

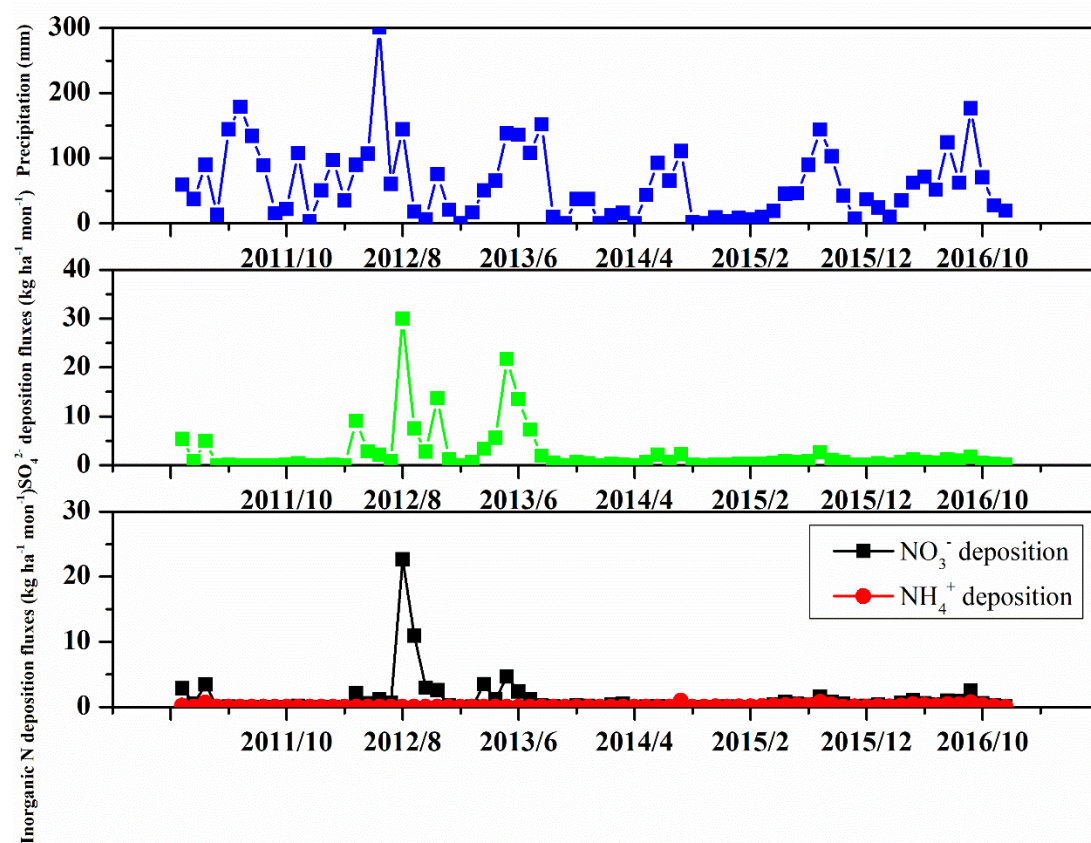

**Fig. S152** The precipitation and wet deposition fluxes of secondary ions in Puer

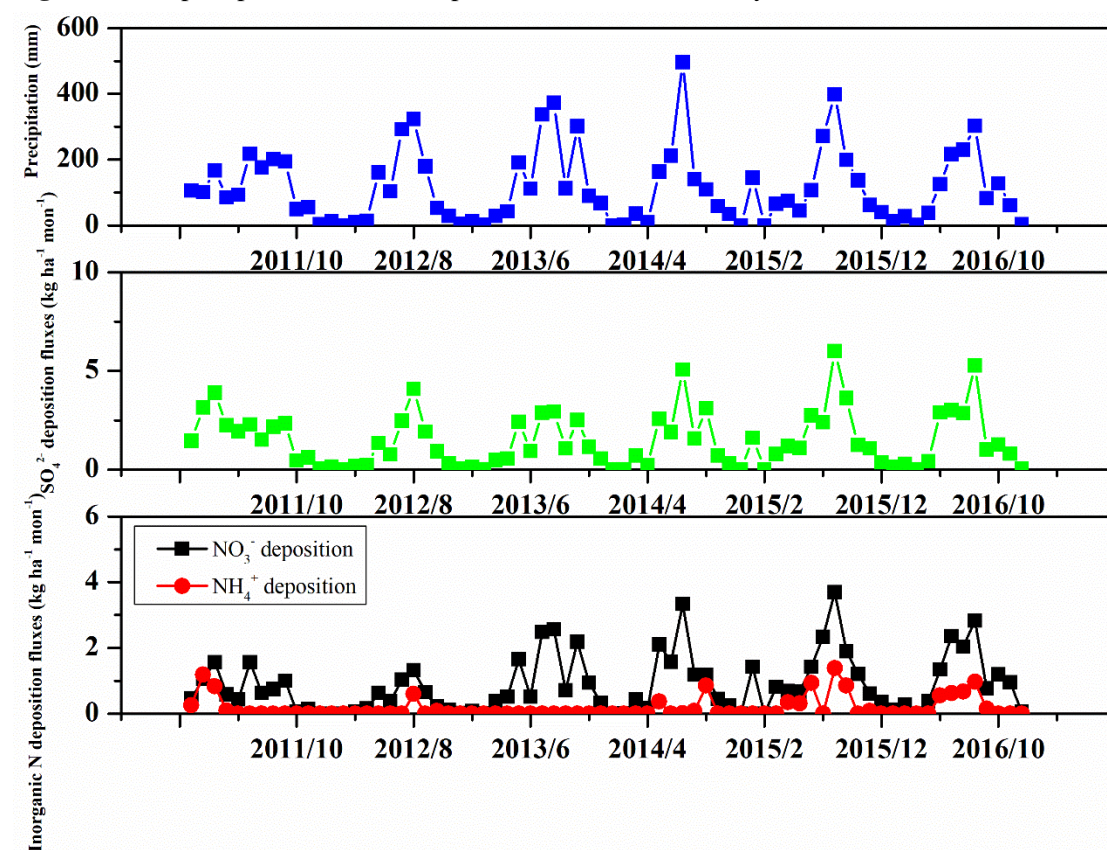

**Fig. S153** The precipitation and wet deposition fluxes of secondary ions in Hebi

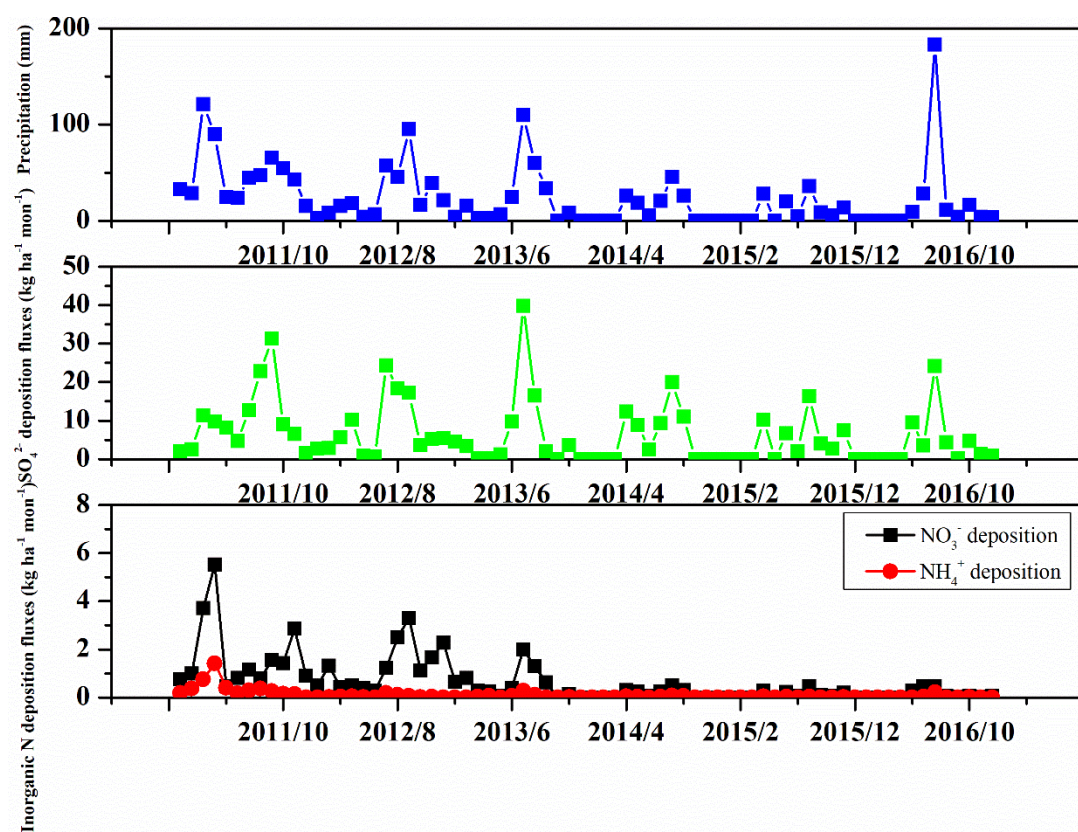

**Fig. S154** The precipitation and wet deposition fluxes of secondary ions in Karamay

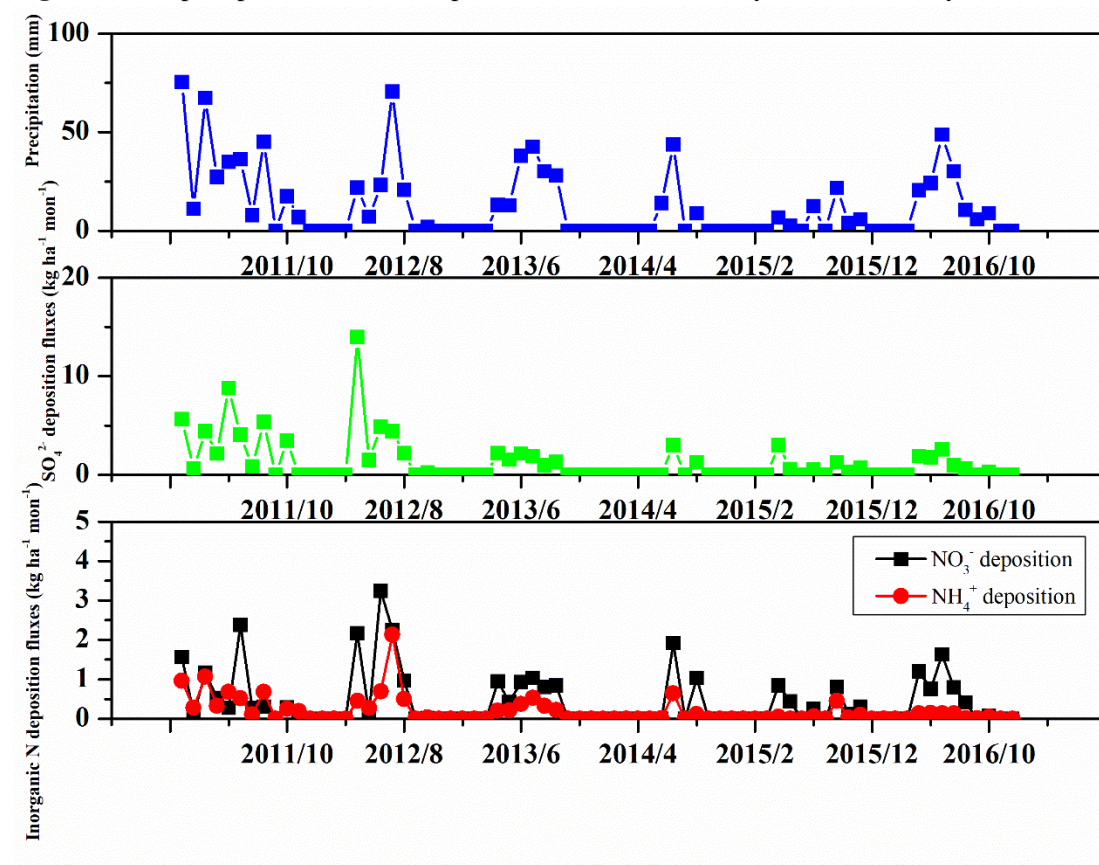



**Fig. S155** The precipitation and wet deposition fluxes of secondary ions in Hami

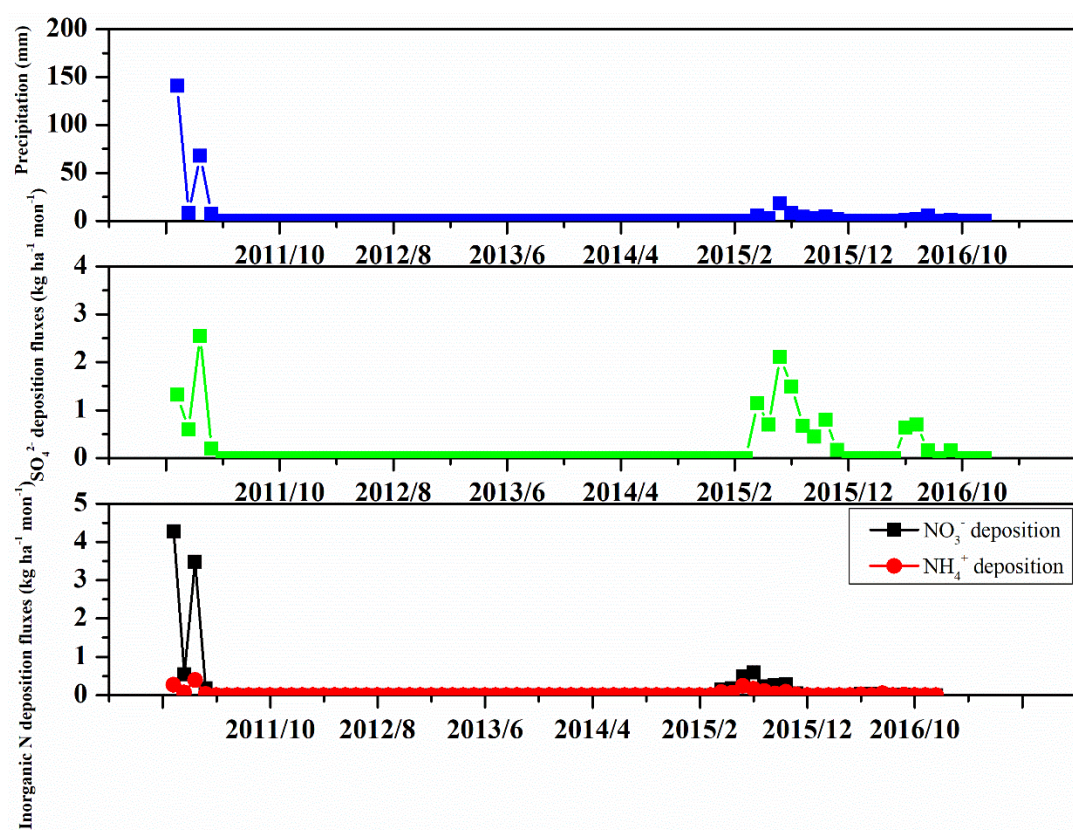



**Fig. S156** The precipitation and wet deposition fluxes of secondary ions in Weihai

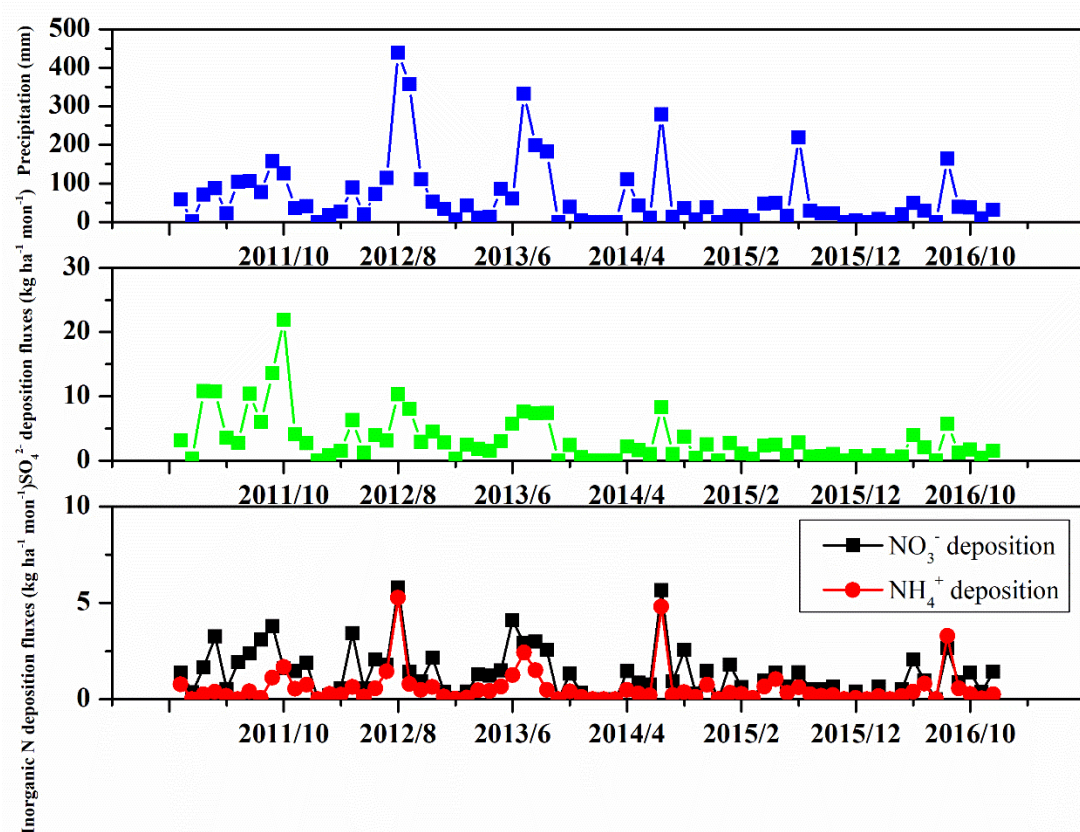

**Fig. S157** The precipitation and wet deposition fluxes of secondary ions in Lhasa

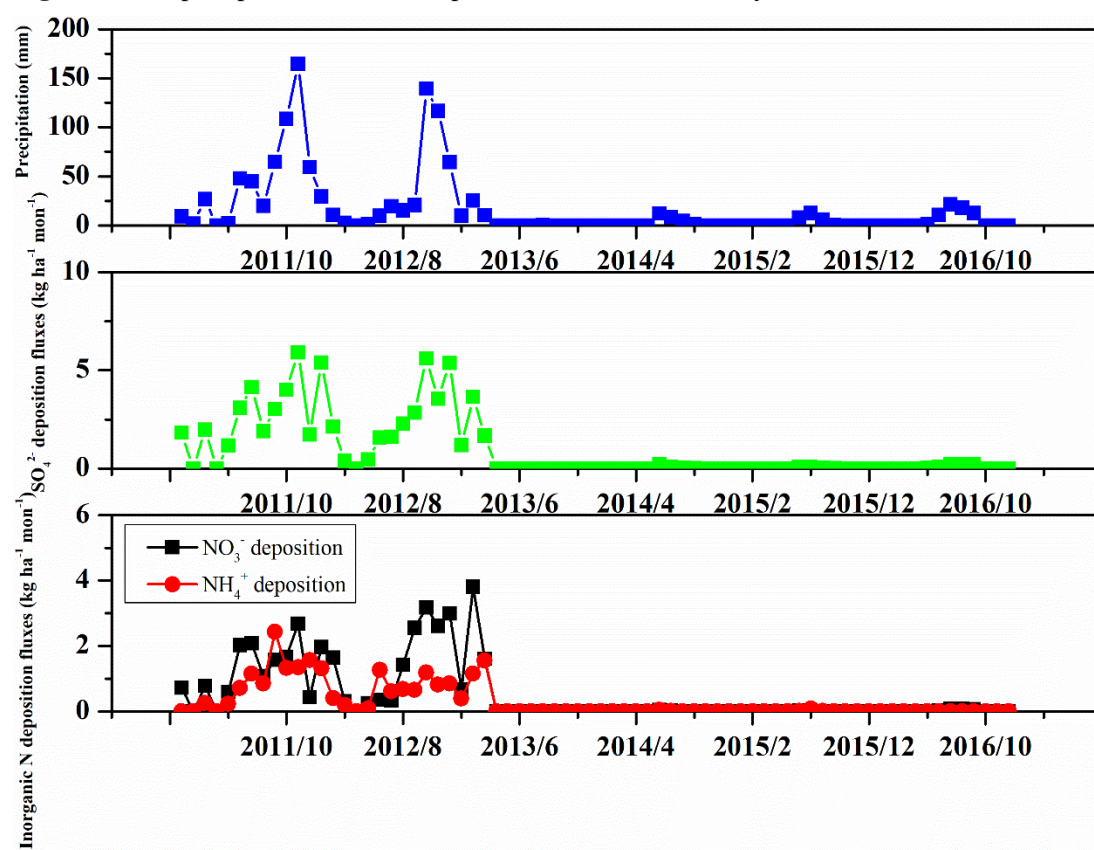

**Fig. S158** The precipitation and wet deposition fluxes of secondary ions in Qujing

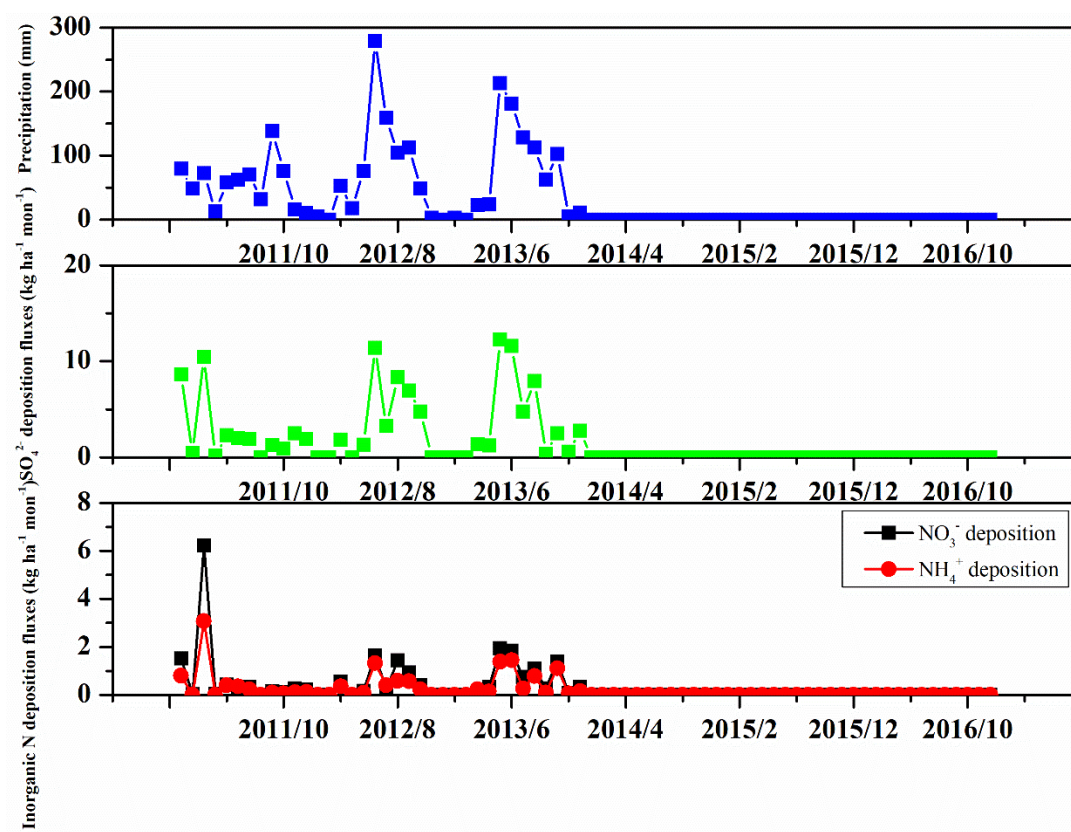

**Fig. S159** The precipitation and wet deposition fluxes of secondary ions in Sanming

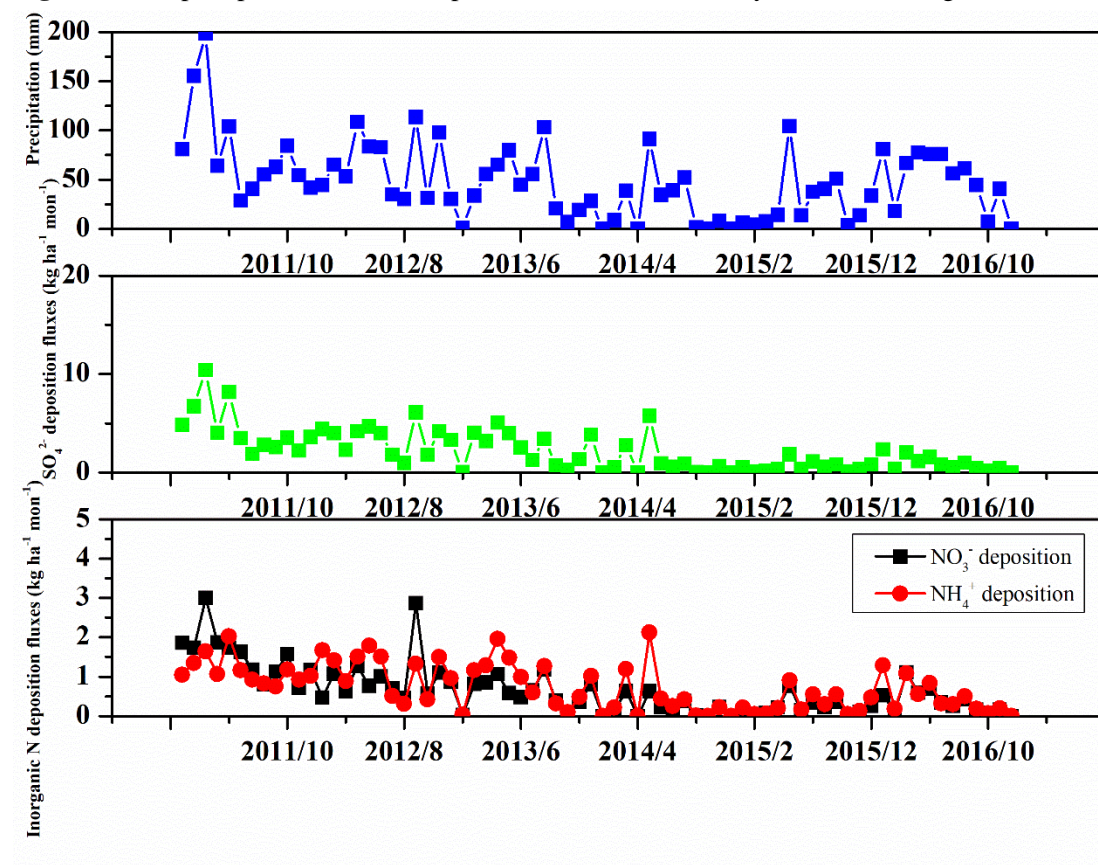

**Fig. S160** The precipitation and wet deposition fluxes of secondary ions in Yichun

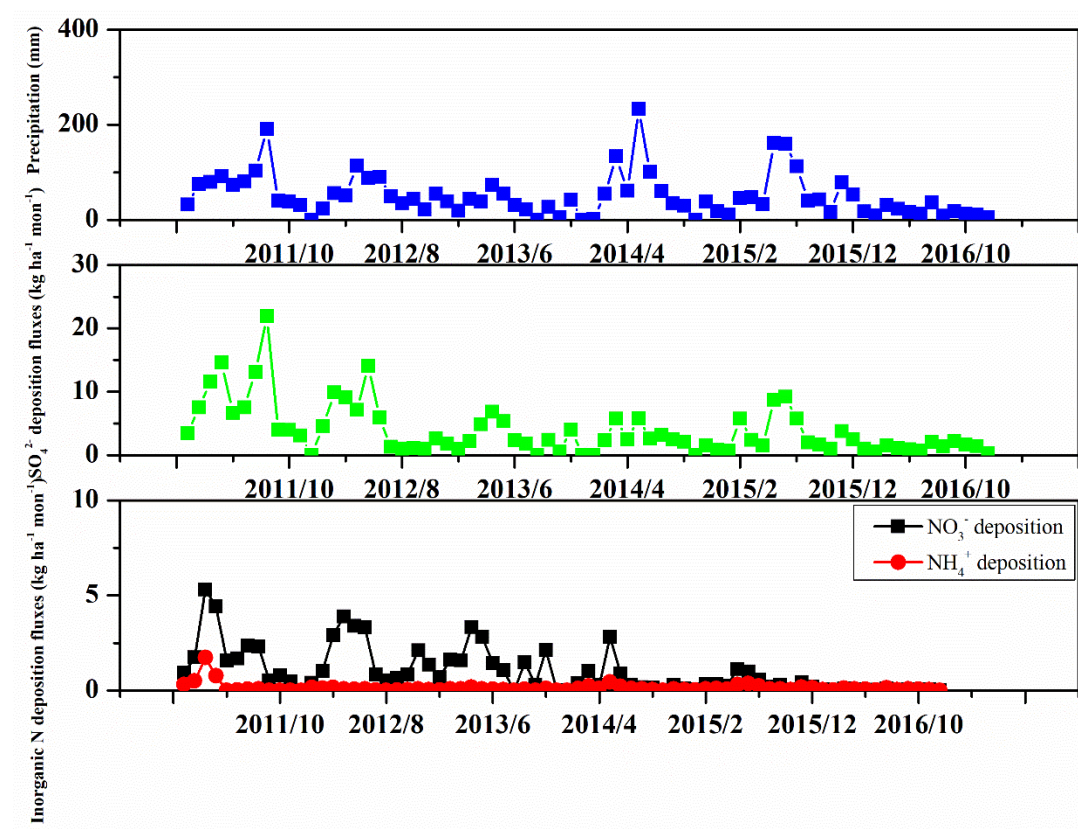



**Fig. S161** The precipitation and wet deposition fluxes of secondary ions in Xiamen

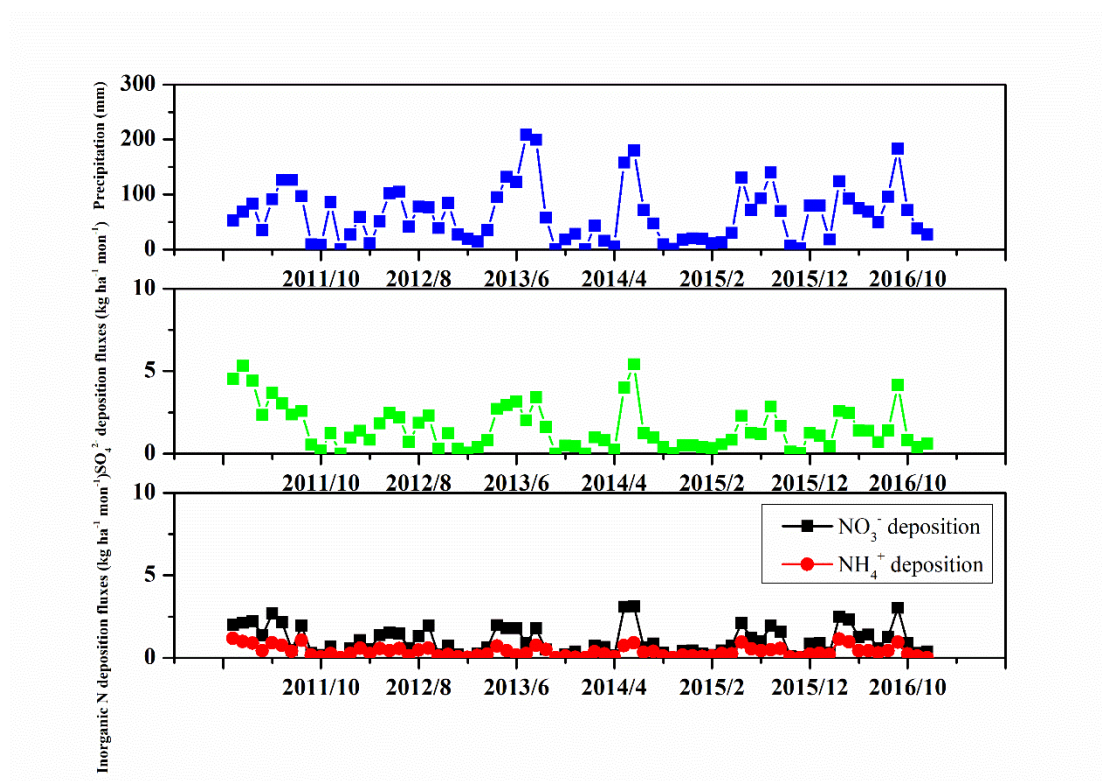

**Fig. S162** The precipitation and wet deposition fluxes of secondary ions in Shenyang

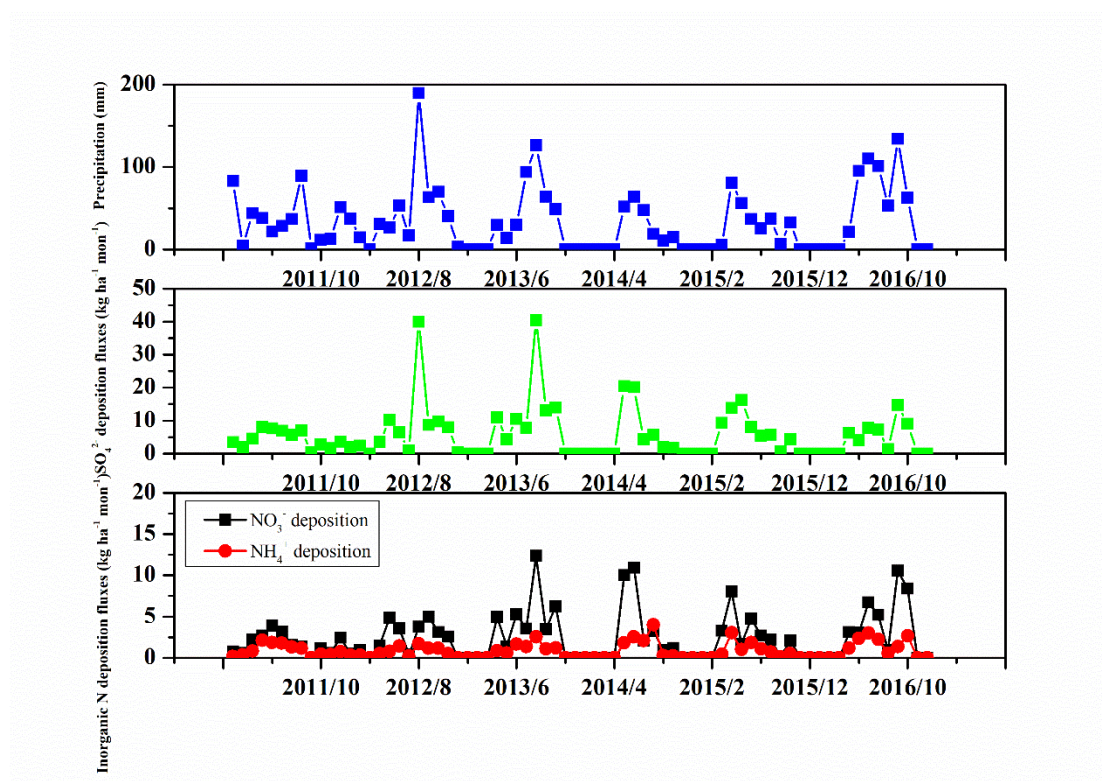

**Fig. S163** The precipitation and wet deposition fluxes of secondary ions in Deyang

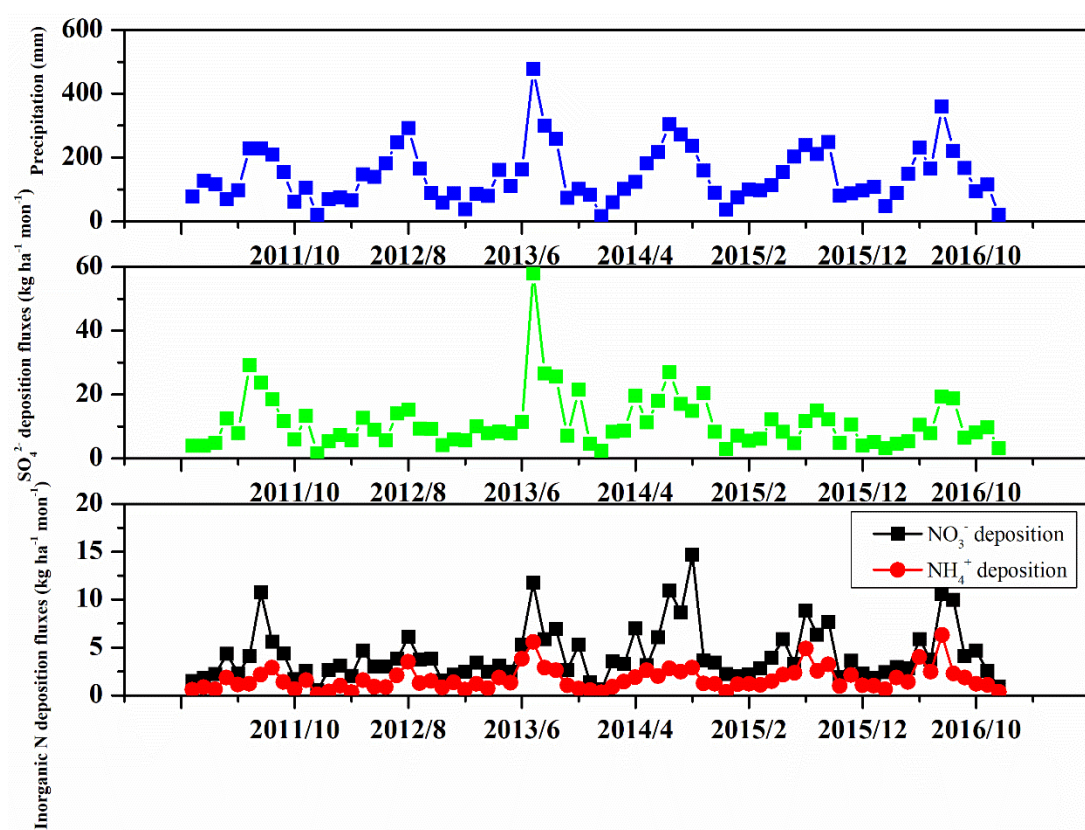

**Fig. S164** The precipitation and wet deposition fluxes of secondary ions in Jinan

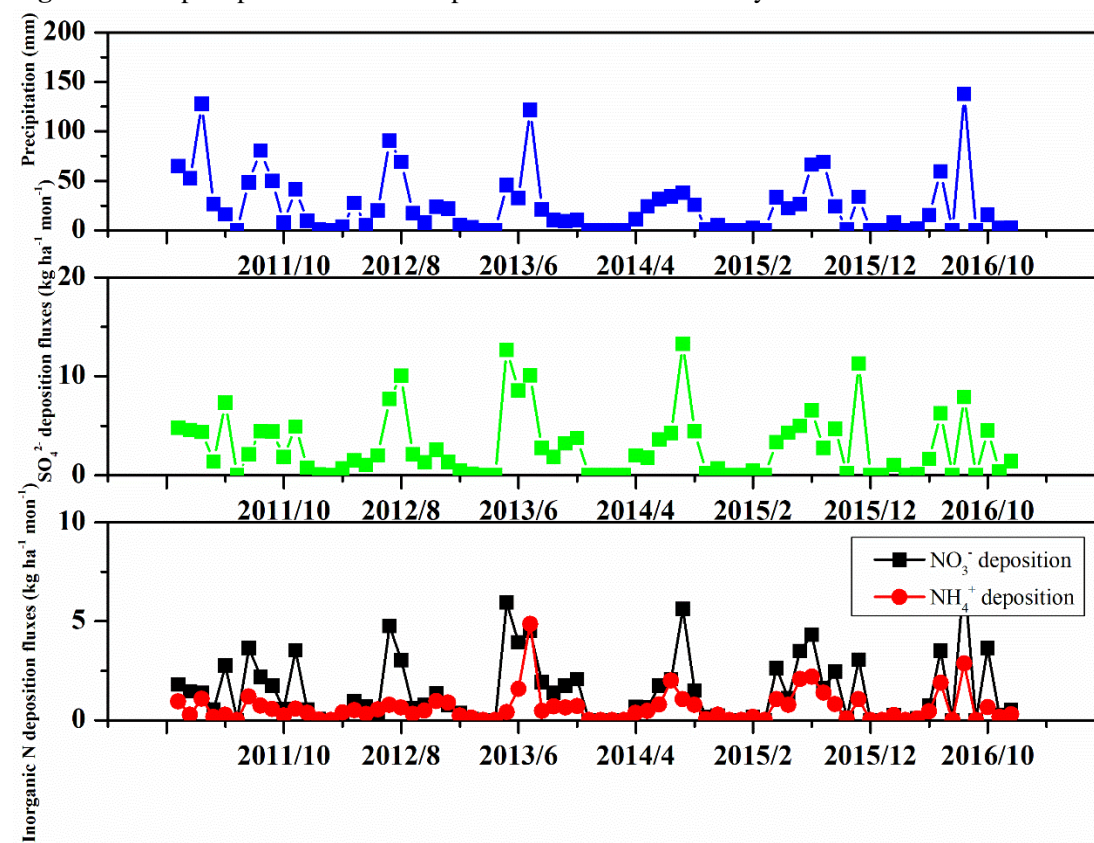

**Fig. S165** The precipitation and wet deposition fluxes of secondary ions in Zhoukou

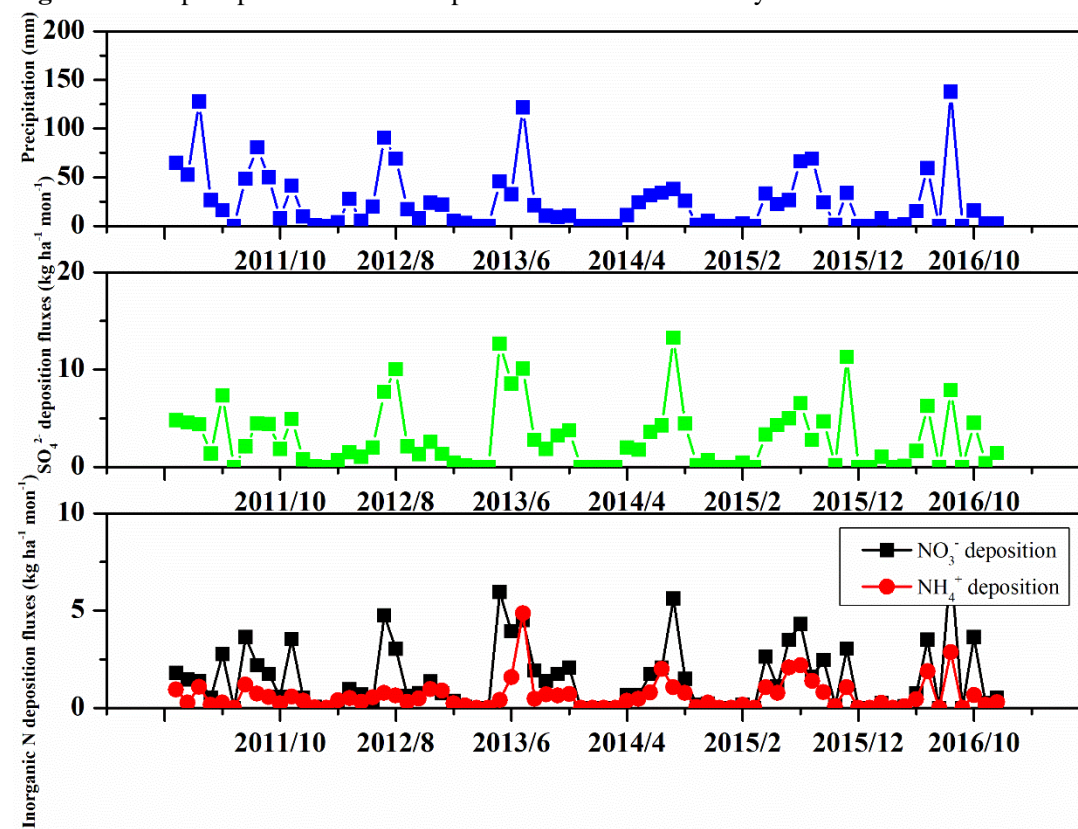



**Fig. S166** The precipitation and wet deposition fluxes of secondary ions in Zaozhuang

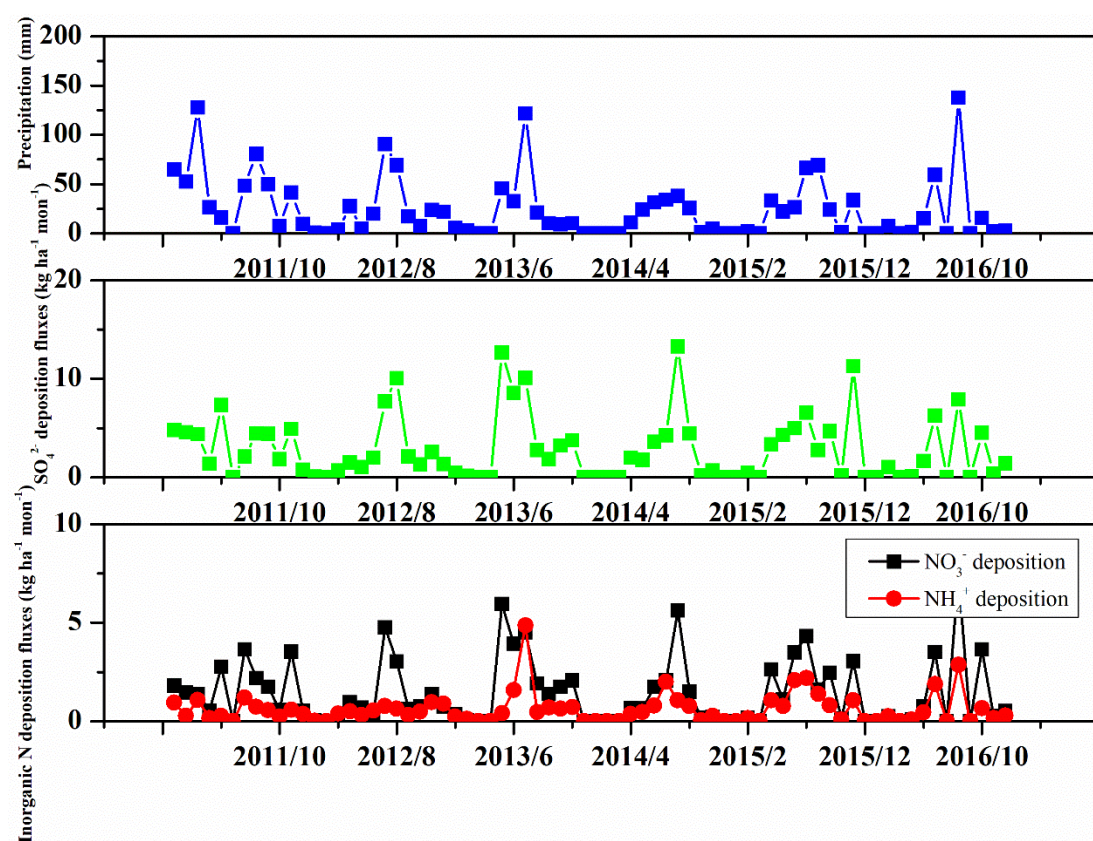

Supplement: Supplementary file 2 [file acp-19-11043-2019-supplement.zip]
