# Supplementary material for: Wet deposition of inorganic ions in 320 cities across China: spatio-temporal variation, source apportionment, and dominant factors
Source: Copernicus journal article supplement (doi:10.5194/acp-19-11043-2019), 2019-09-02
Supplement: Supplementary file 3 [file acp-19-11043-2019-supplement.zip]

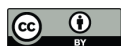

## *Supplement of*

# **Wet deposition of inorganic ions in 320 cities across China: spatio-temporal variation, source apportionment, and dominant factors**

**Rui Li et al.**

*Correspondence to:* Hongbo Fu (fuhb@fudan.edu.cn)

- [acp-19-11043-2019-supplement-title-page.pdf](#)
- [Appendix.pdf](#)
- [Response.pdf](#)
- [SI.pdf](#)
- [manuscript.pdf](#)

The copyright of individual parts of the supplement might differ from the CC BY 4.0 License.
