# Supplementary material for: Wet deposition of inorganic ions in 320 cities across China: spatio-temporal variation, source apportionment, and dominant factors
Source: Copernicus journal article supplement (doi:10.5194/acp-19-11043-2019), 2019-09-02
Supplement: Supplementary file 5 [file acp-19-11043-2019-supplement.zip]

Archive with 5 entries (5 files):
- acp-19-11043-2019-supplement-title-page.pdf
- Appendix.pdf
- Response.pdf
- manuscript.pdf
- SI.pdf
